# Supplementary material for: Synthesis of 1,5-Substituted Pyrrolidin-2-ones from Donor–Acceptor Cyclopropanes and Anilines/Benzylamines
Source: MDPI journal article supplement (doi:10.3390/molecules27238468), 2022-12-02
Supplement: s1 [file s1]

# Synthesis of 1,5-Substituted Pyrrolidin-2-ones from Donor-Acceptor Cyclopropanes and Anilines/Benzylamines

Maksim A. Boichenko <sup>1</sup>, Andrey Yu. Plodukhin <sup>1</sup>, Vitaly V. Shorokhov <sup>1</sup>, Danyla S. Lebedev <sup>1</sup>, Anastasya V. Filippova <sup>1</sup>, Sergey S. Zhokhov <sup>1</sup>, Elena A. Tarasenko <sup>1</sup>, Victor B. Rybakov <sup>1</sup>, Igor V. Trushkov <sup>2,\*</sup>, and Olga A. Ivanova<sup>1,\*</sup>

<sup>1</sup> Department of Chemistry, M. V. Lomonosov Moscow State University, Leninskie gory 1-3, Moscow 119991, Russia

<sup>2</sup> N. D. Zelinsky Institute of Organic Chemistry, Leninsky pr. 47, Moscow 119334, Russia

\*Correspondence: [iv@kinet.chem.msu.ru](mailto:iv@kinet.chem.msu.ru) (O.A.I.); [trush@ioc.ac.ru](mailto:trush@ioc.ac.ru) (I.V.T.); Tel.: +7-916-645-9951 (I.V.T.)

## SUPPORTING INFORMATION

### Table of Contents

|                                                                                       |     |
|---------------------------------------------------------------------------------------|-----|
| <sup>1</sup> H and <sup>13</sup> C NMR spectra                                        | S2  |
| HPLC determination of enantiomeric purity of pyrrolidin-2-one ( <i>R</i> )- <b>2d</b> | S65 |

**5-(3,5-Dimethoxyphenyl)-1-phenylpyrrolidin-2-one (2a)**

$^1\text{H}$  NMR ( $\text{CDCl}_3$ , 600 MHz)

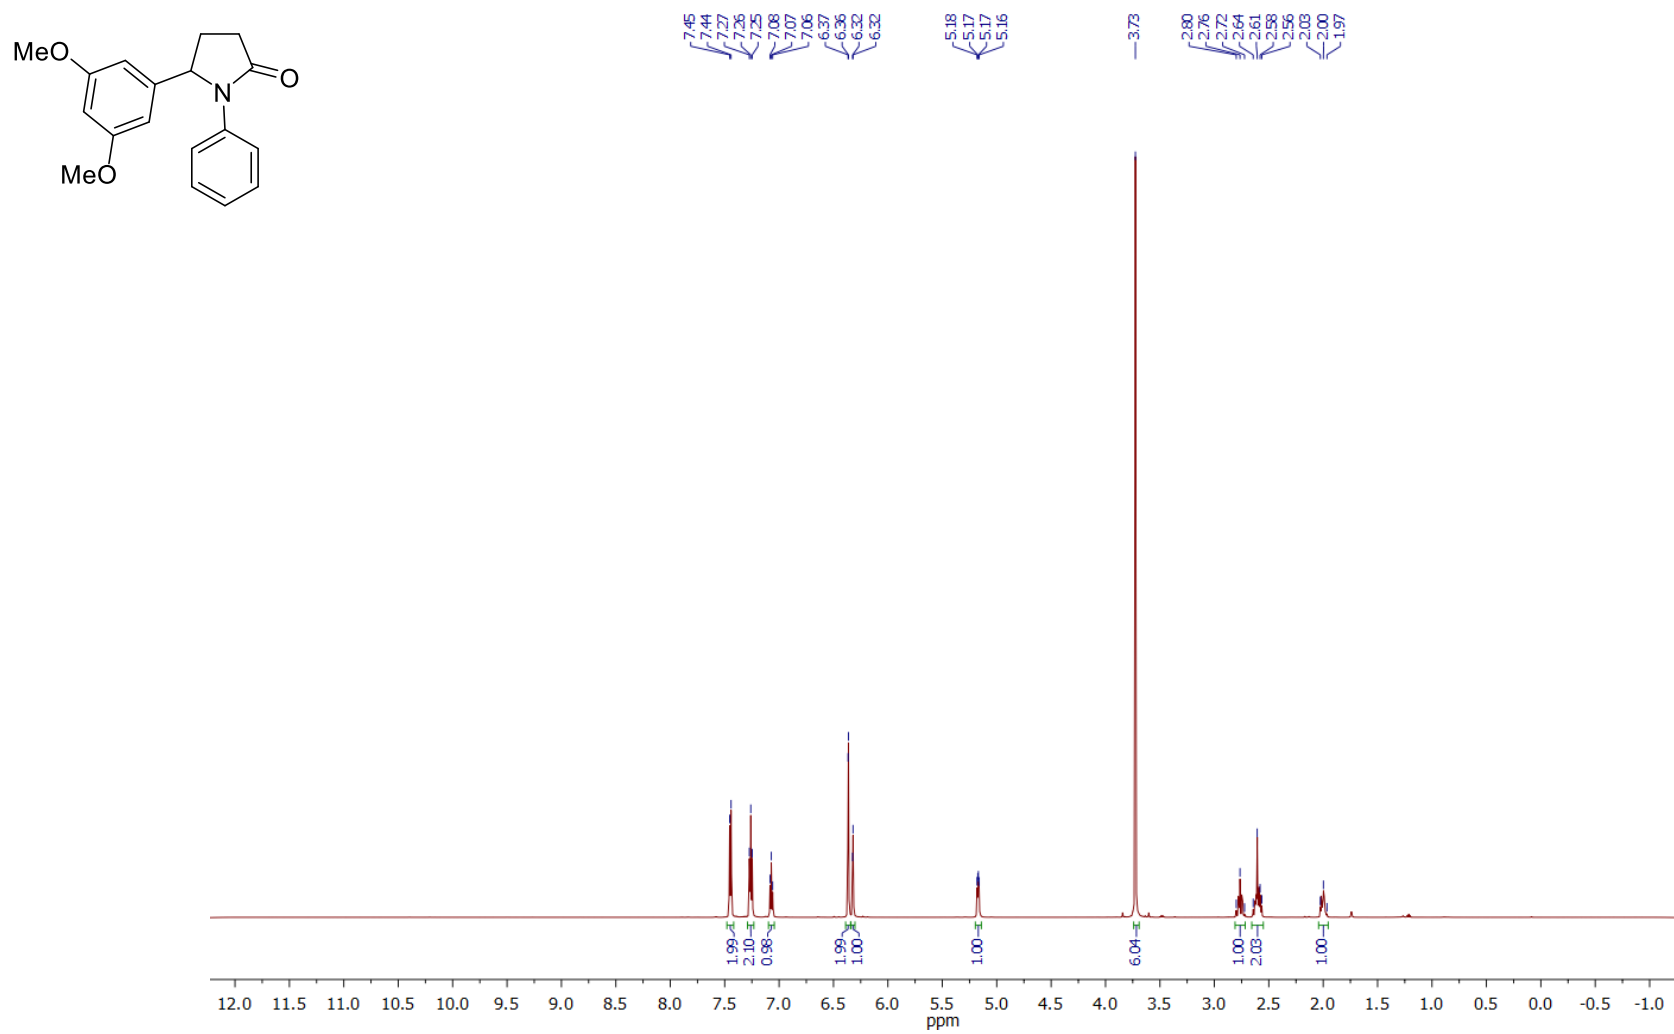

**5-(3,5-Dimethoxyphenyl)-1-phenylpyrrolidin-2-one (2a)**

$^{13}\text{C}$  NMR ( $\text{CDCl}_3$ , 150 MHz)

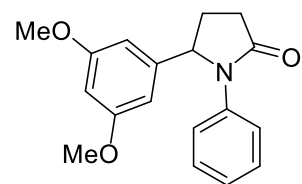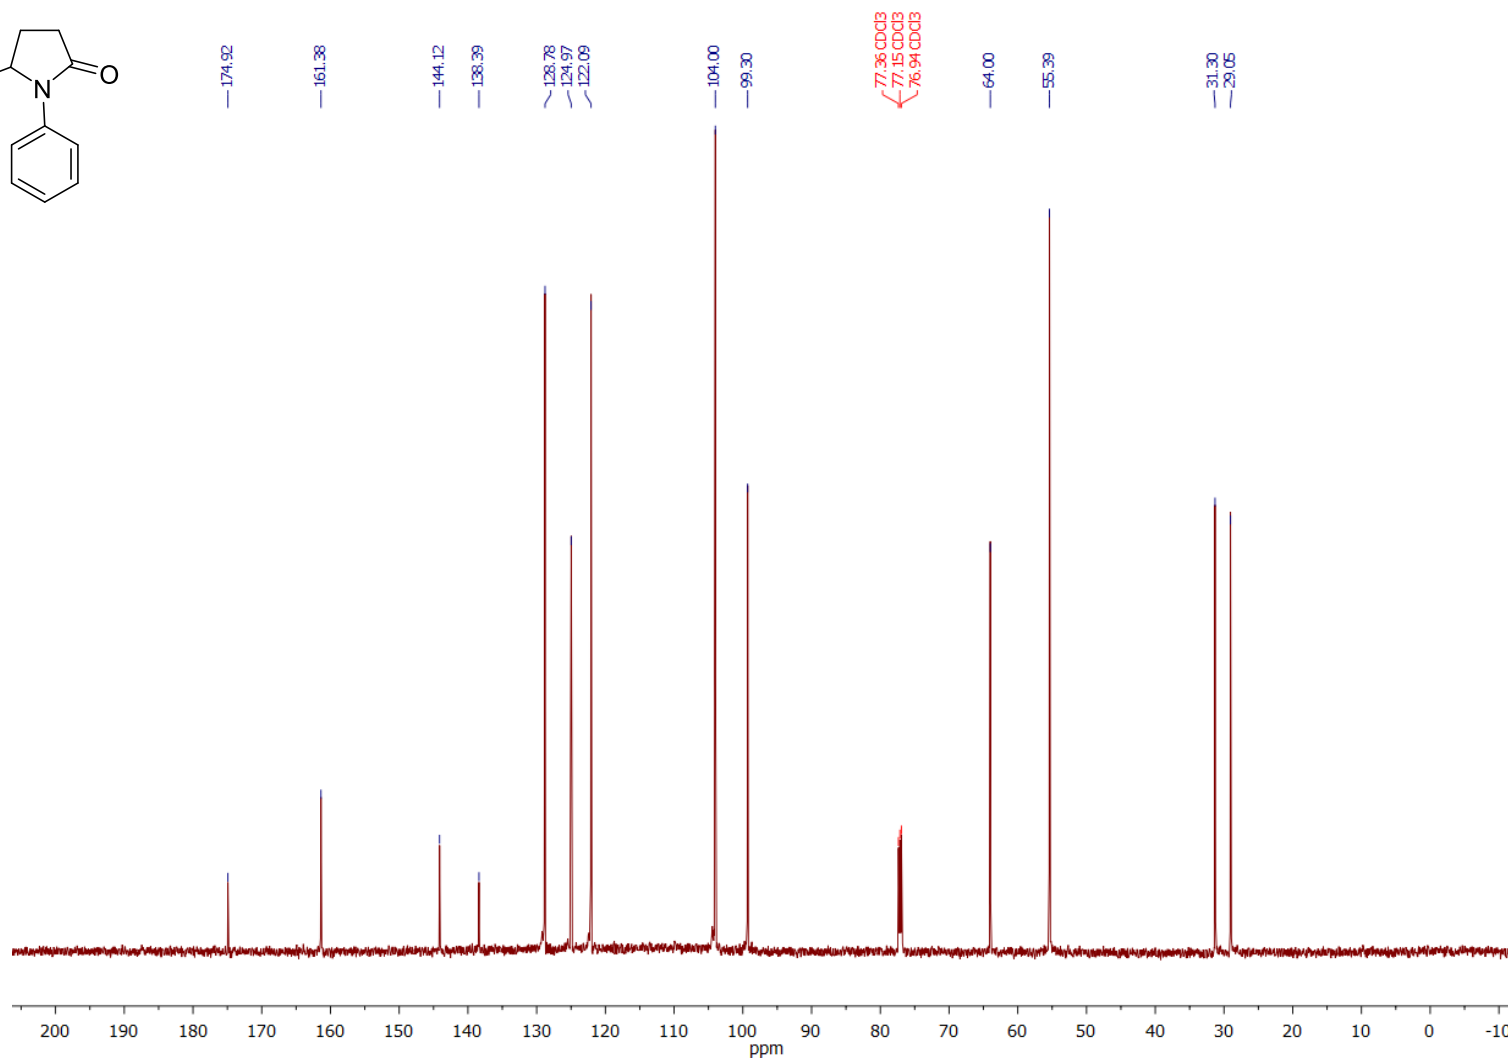

**5-(3,4,5-Trimethoxyphenyl)-1-(2-fluorophenyl)pyrrolidin-2-one (2b)**

$^1\text{H}$  NMR ( $\text{CDCl}_3$ , 400 MHz)

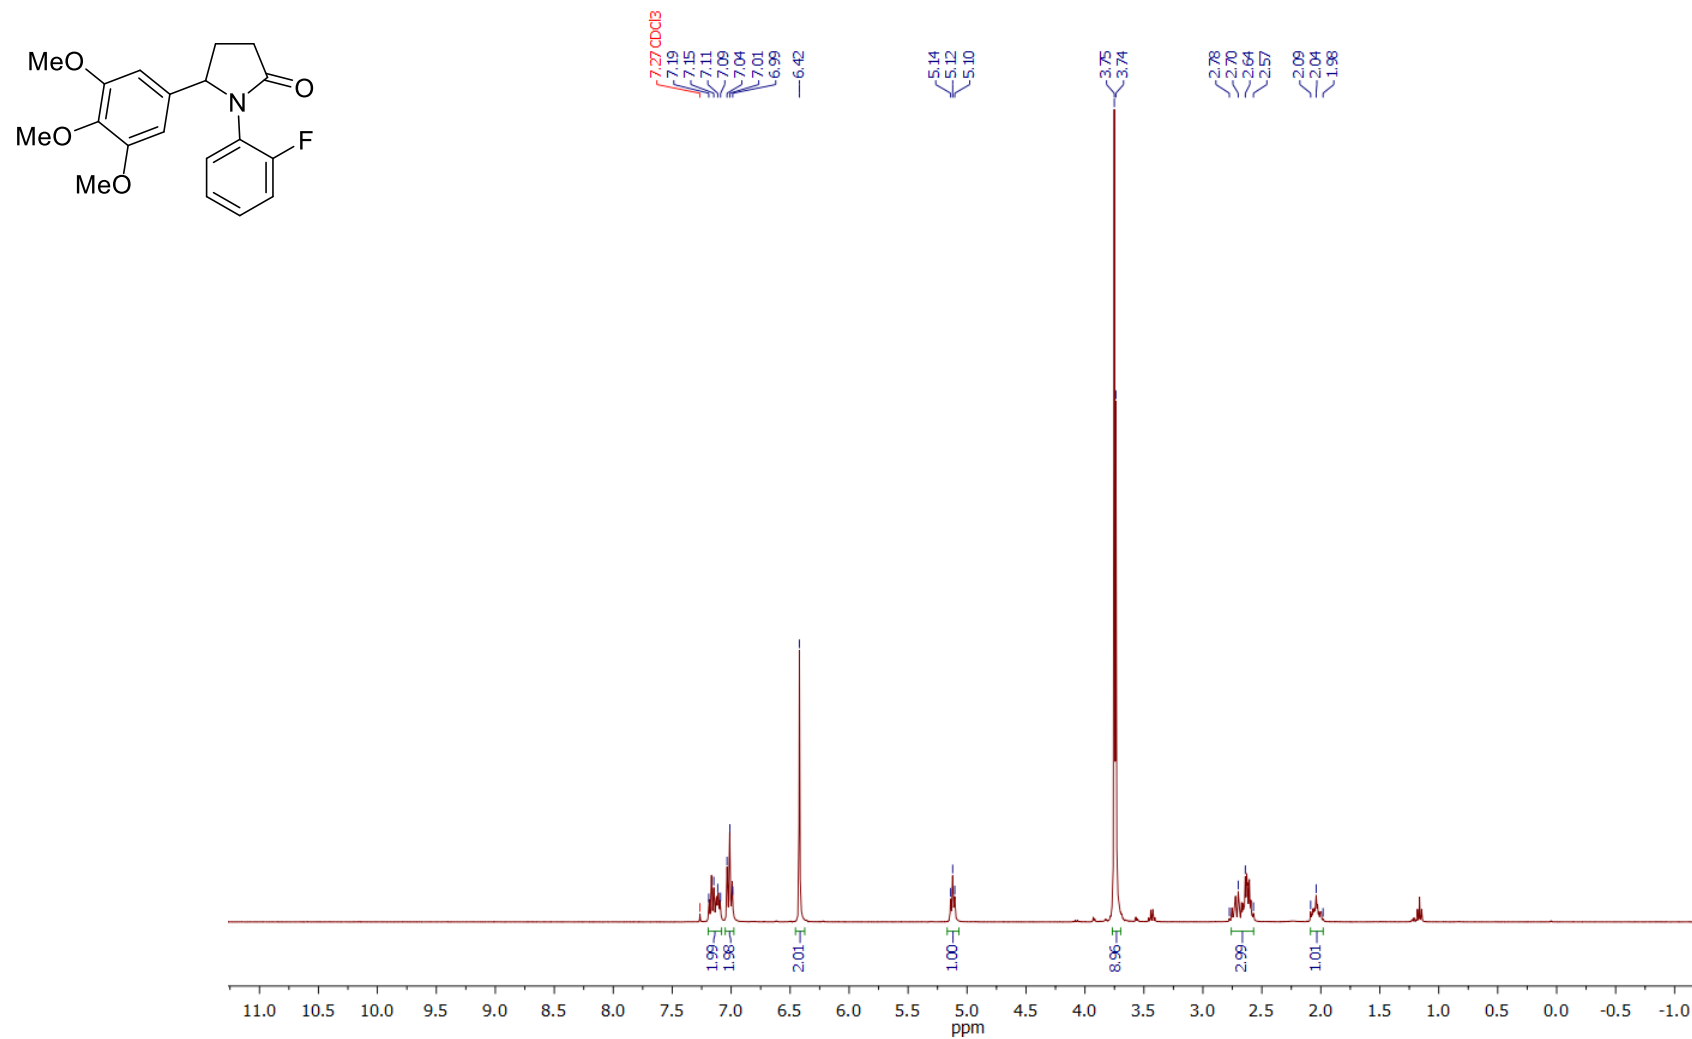

**5-(3,4,5-Trimethoxyphenyl)-1-(2-fluorophenyl)pyrrolidin-2-one (2b)**

$^{13}\text{C}$  NMR ( $\text{CDCl}_3$ , 100 MHz)

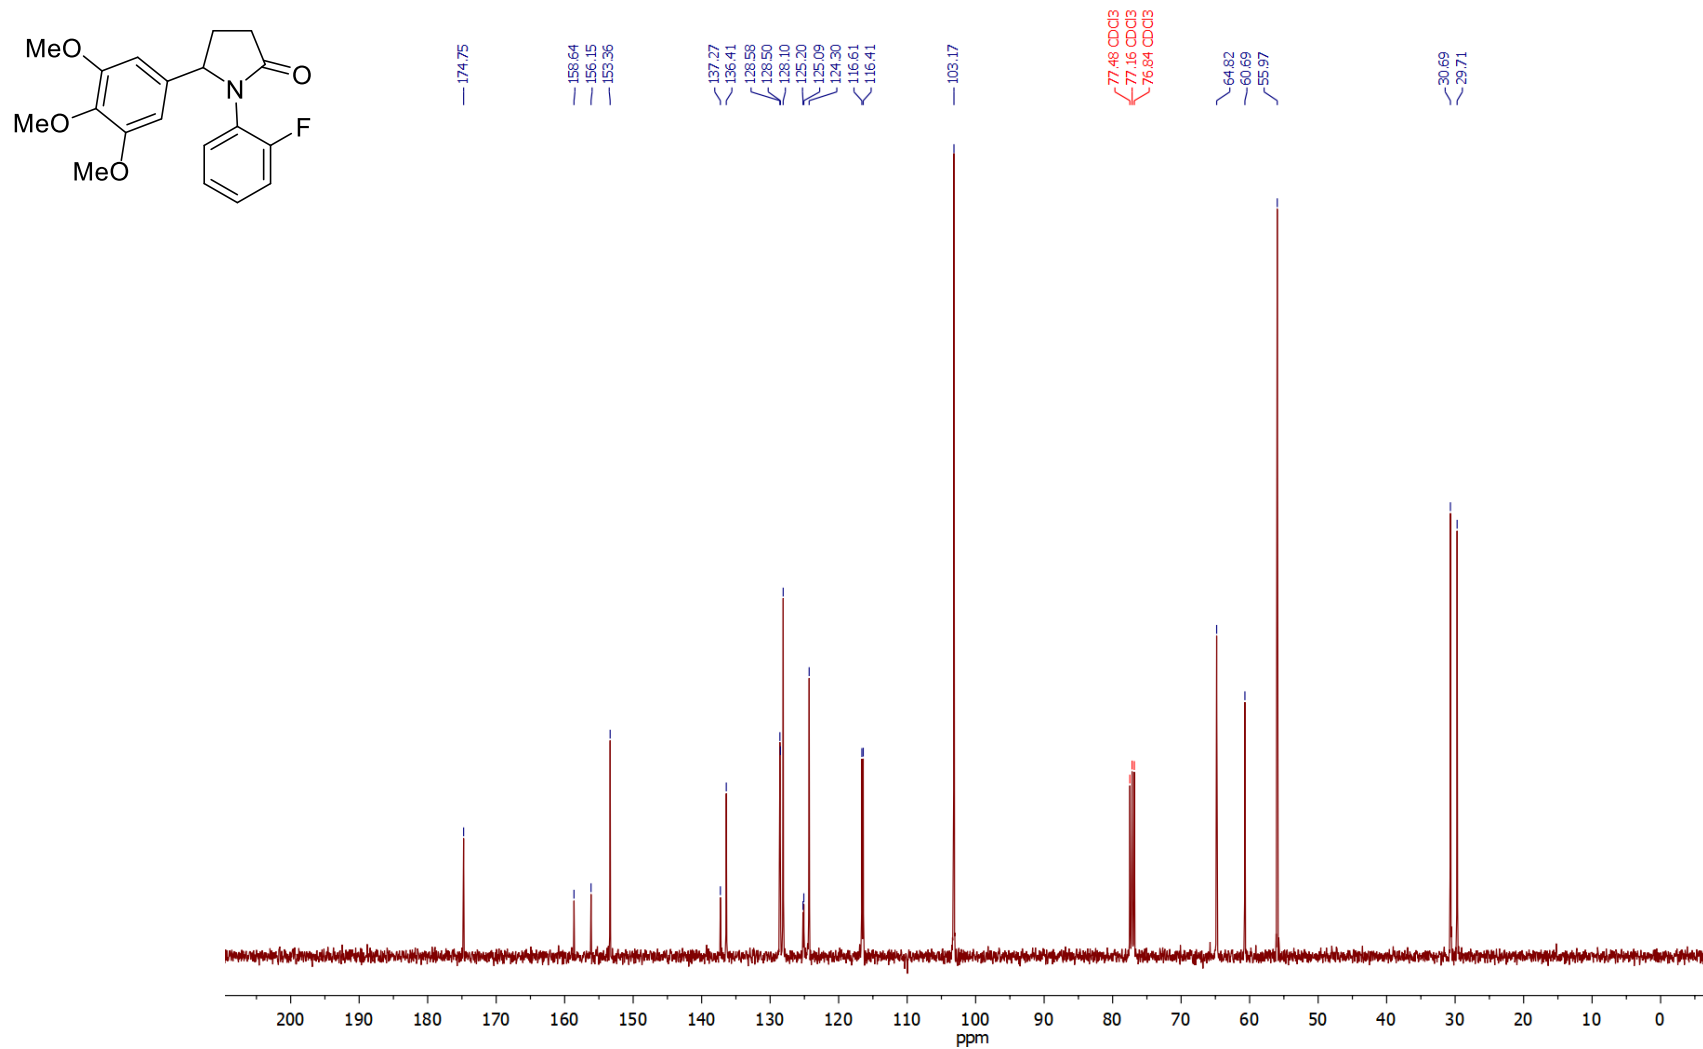

**1-(4-Methoxyphenyl)-5-(*p*-tolyl)pyrrolidin-2-one (2d)**

<sup>1</sup>H NMR (CDCl<sub>3</sub>, 600 MHz)

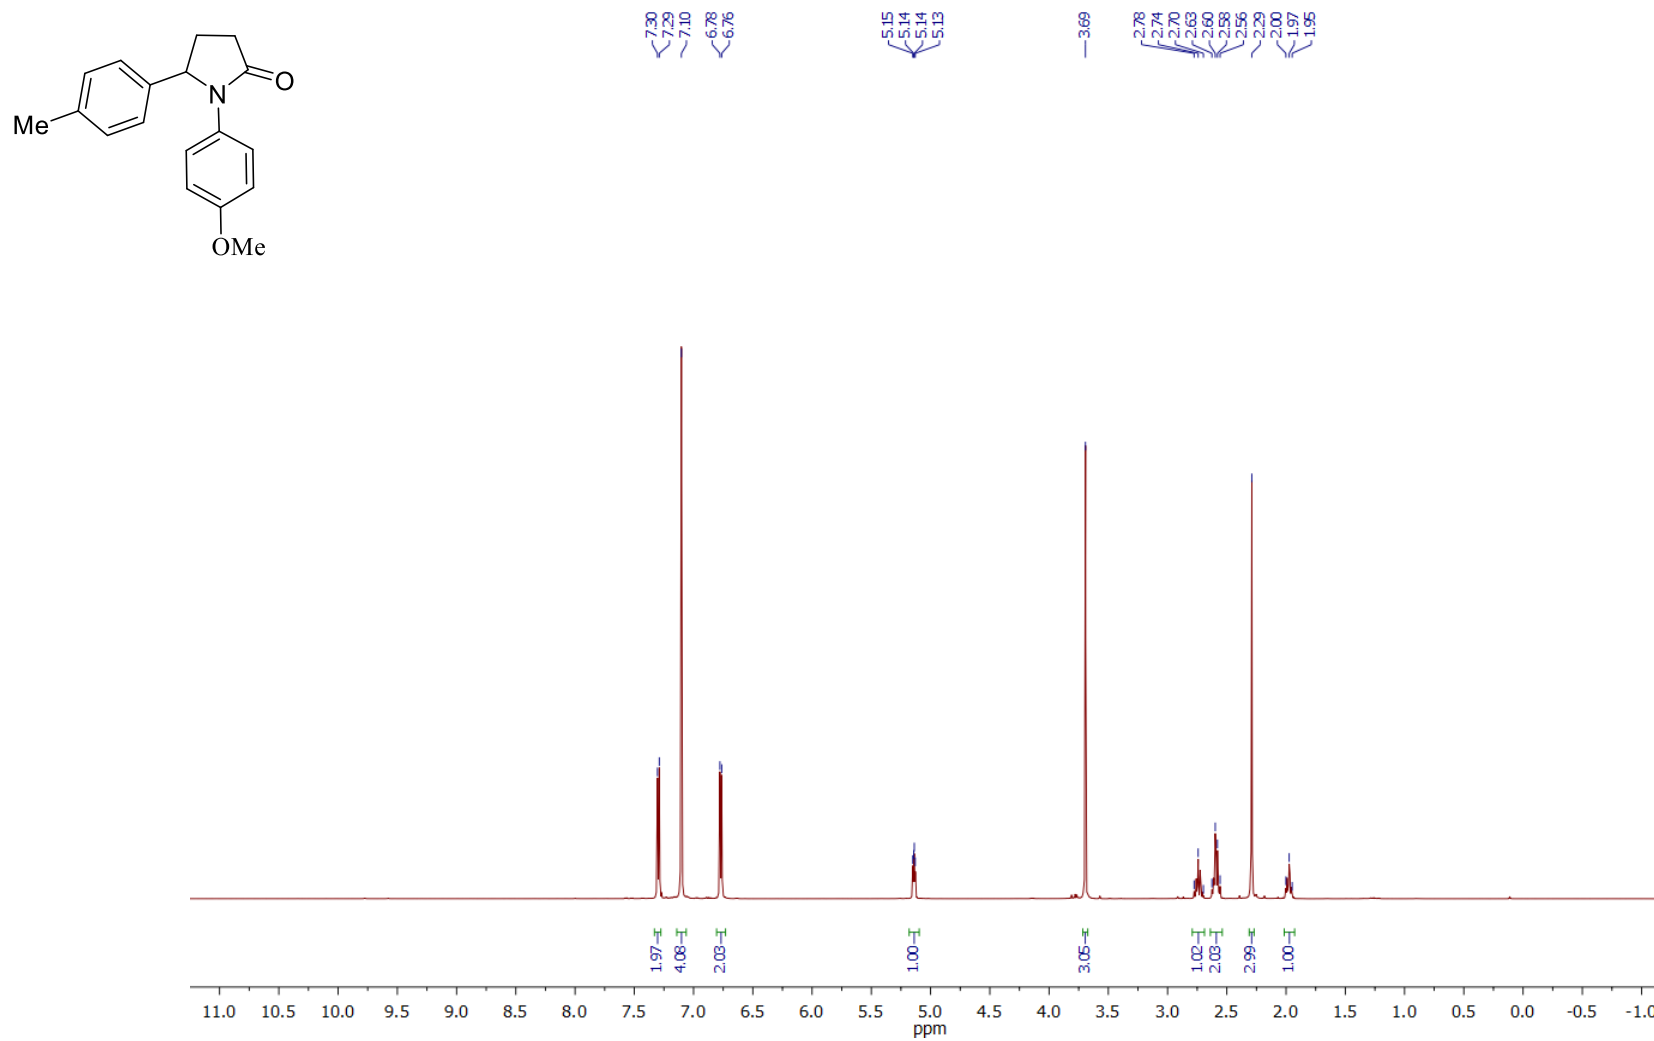

**1-(4-Methoxyphenyl)-5-(*p*-tolyl)pyrrolidin-2-one (2d)**

$^{13}\text{C}$  NMR ( $\text{CDCl}_3$ , 150 MHz)

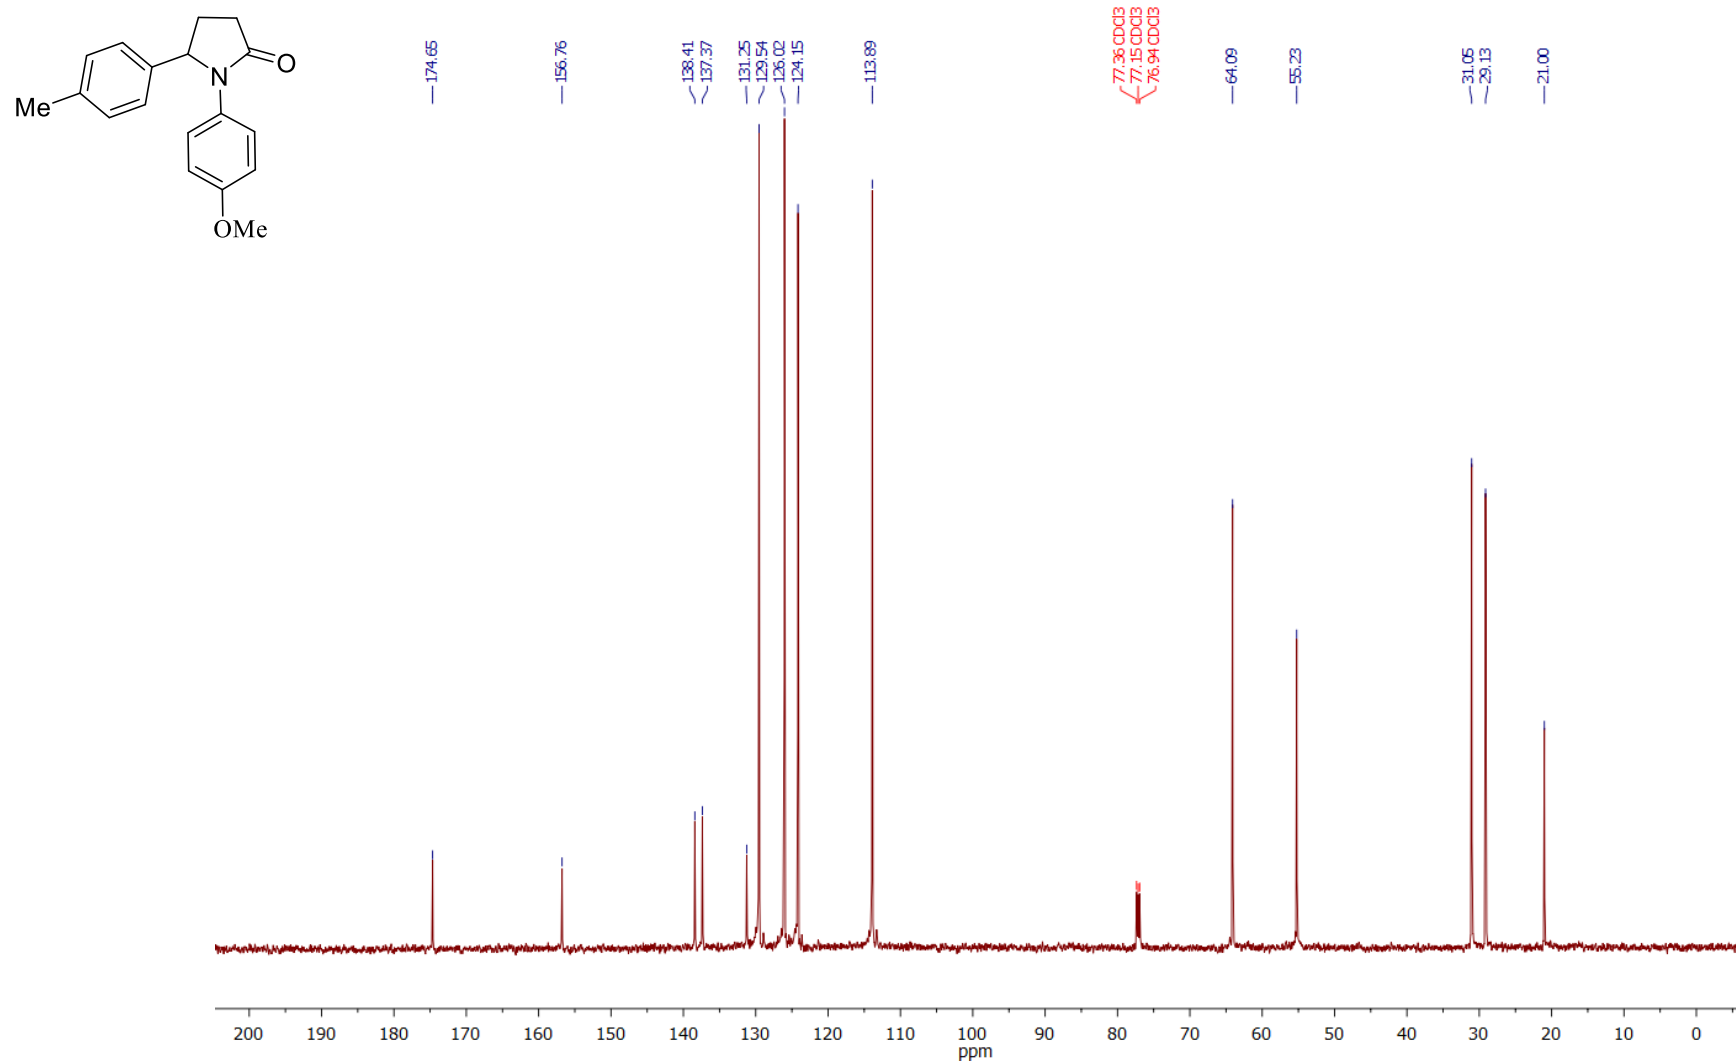

**1-(4-Methoxyphenyl)-5-(p-tolyl)pyrrolidin-2-one (2d)**

HSQC  $^1\text{H}$ - $^{13}\text{C}$  ( $\text{CDCl}_3$ )

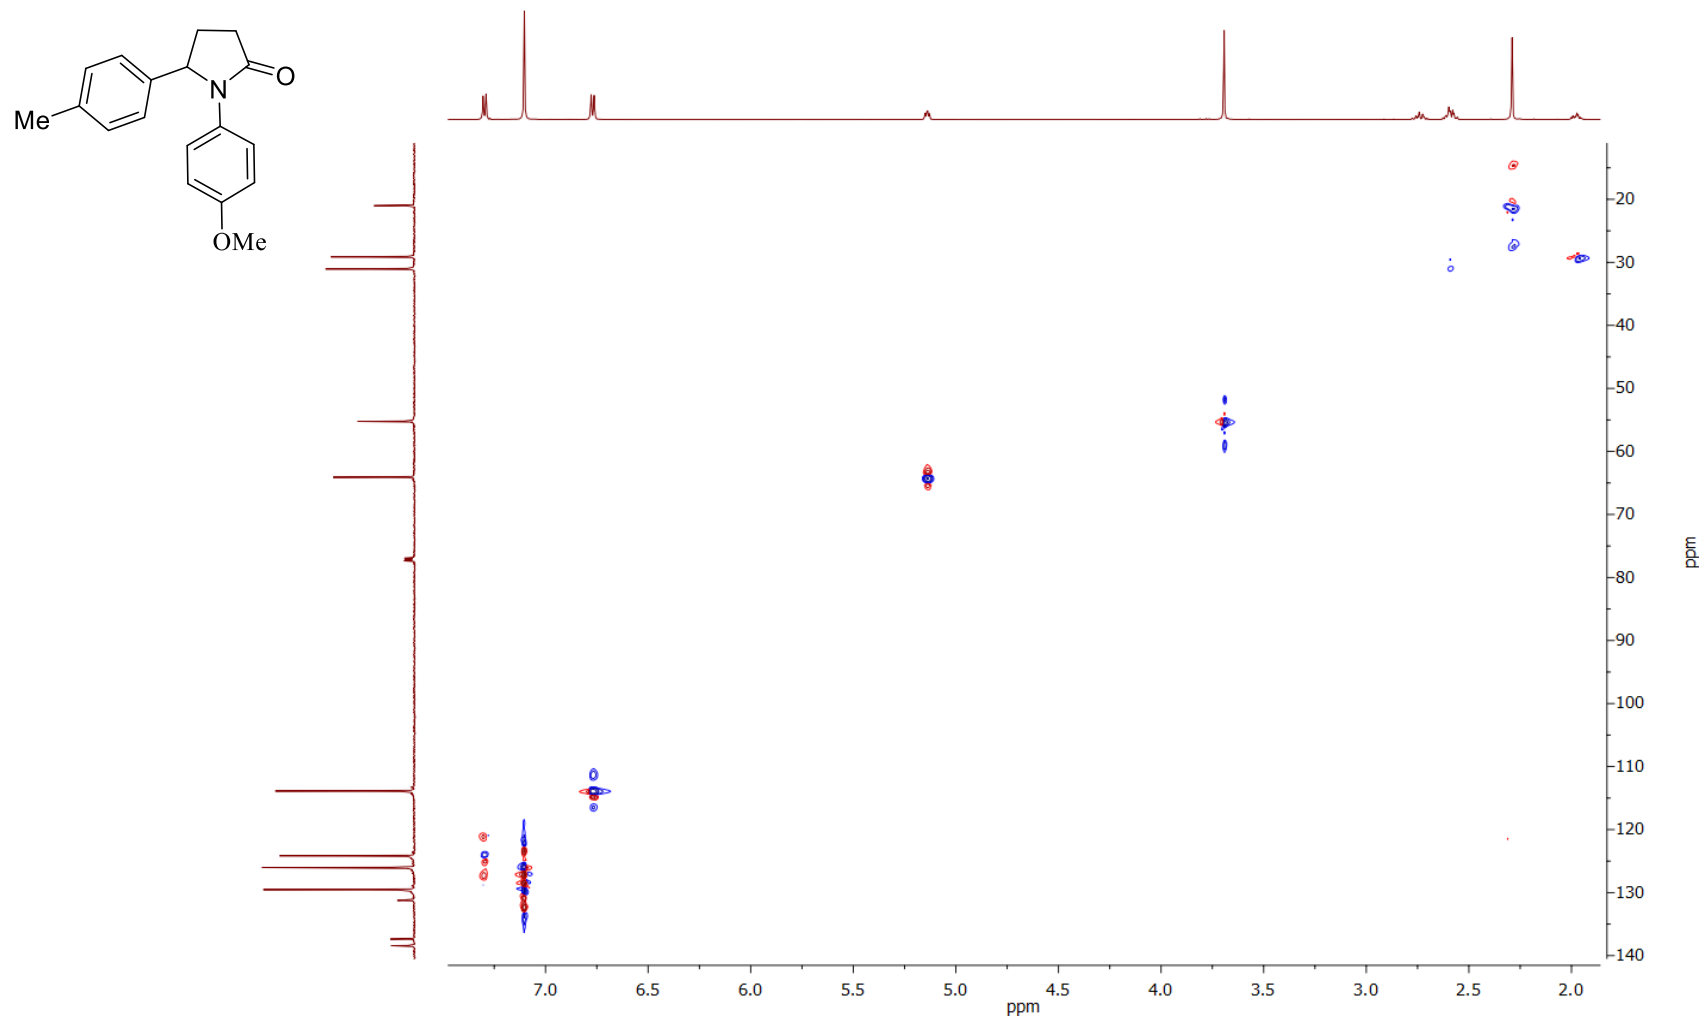



**1-(4-Methoxyphenyl)-5-(*p*-tolyl)pyrrolidin-2-one (2d)**

HMBC  $^1\text{H}$ - $^{13}\text{C}$  ( $\text{CDCl}_3$ )

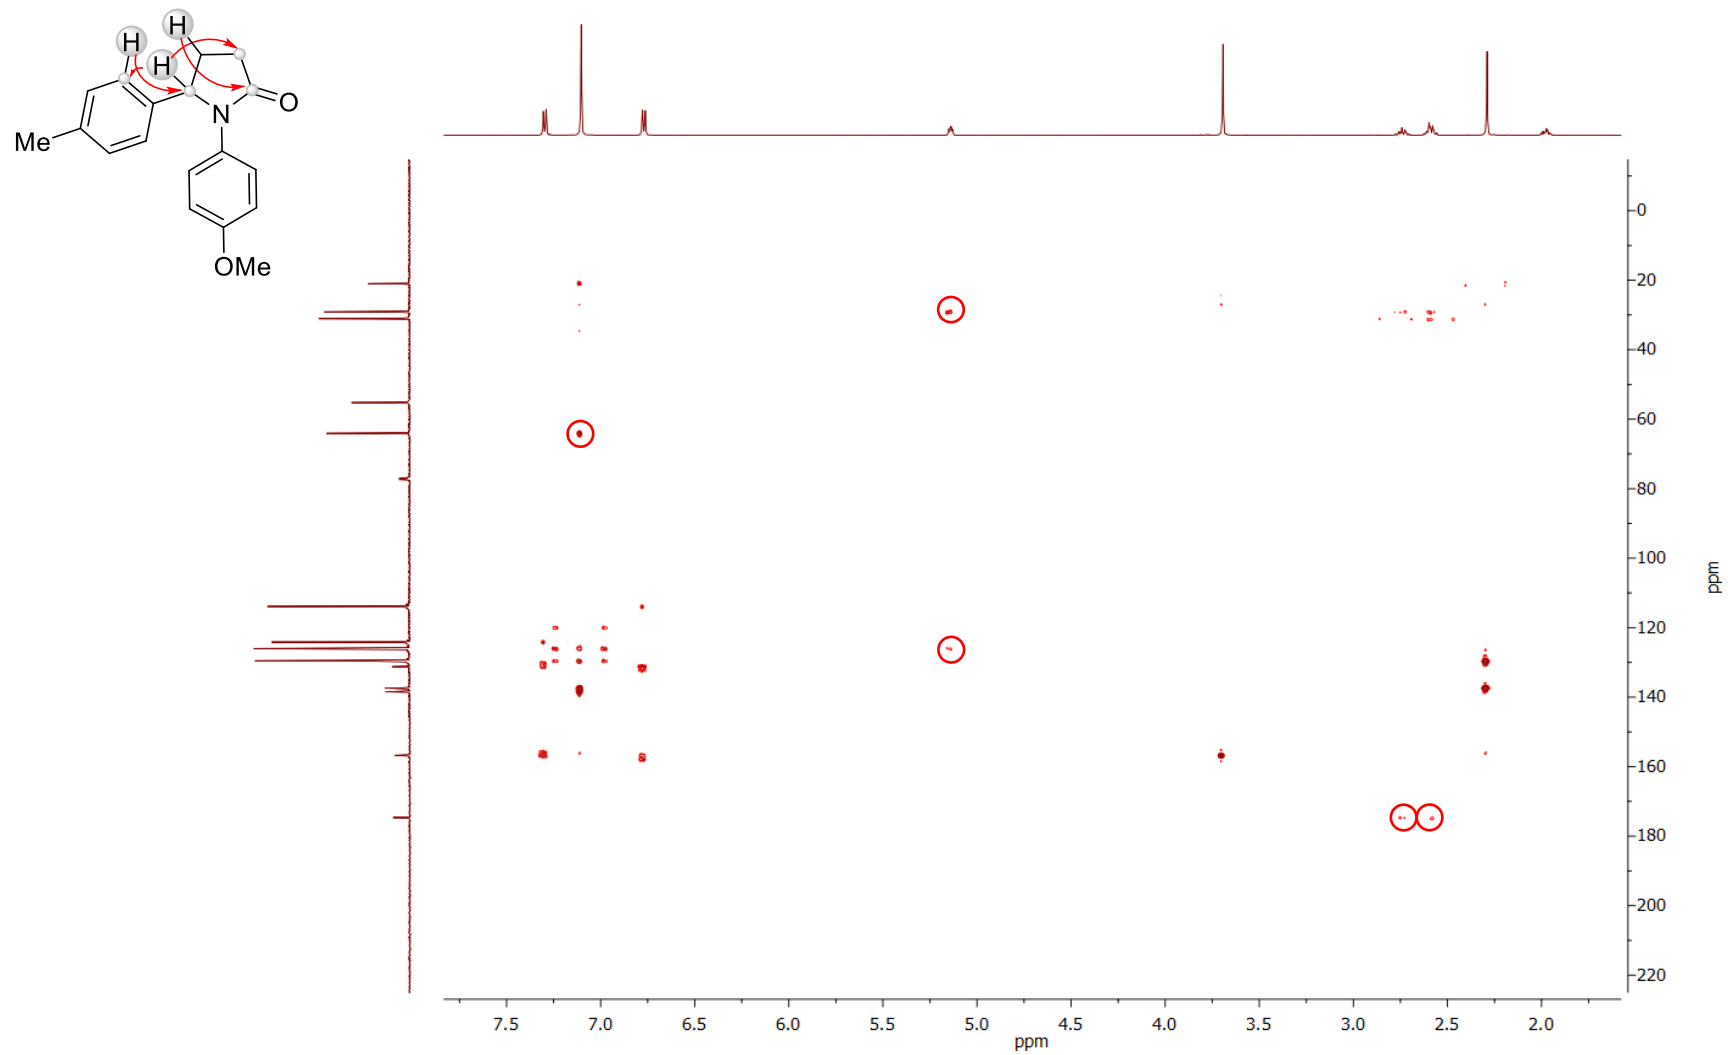

**5-(3-Chlorophenyl)-1-(4-nitrophenyl)pyrrolidin-2-one (2e)**

<sup>1</sup>H NMR (CDCl<sub>3</sub>, 600 MHz)

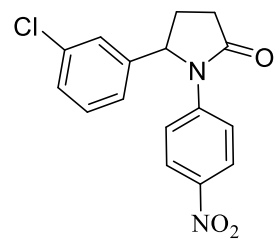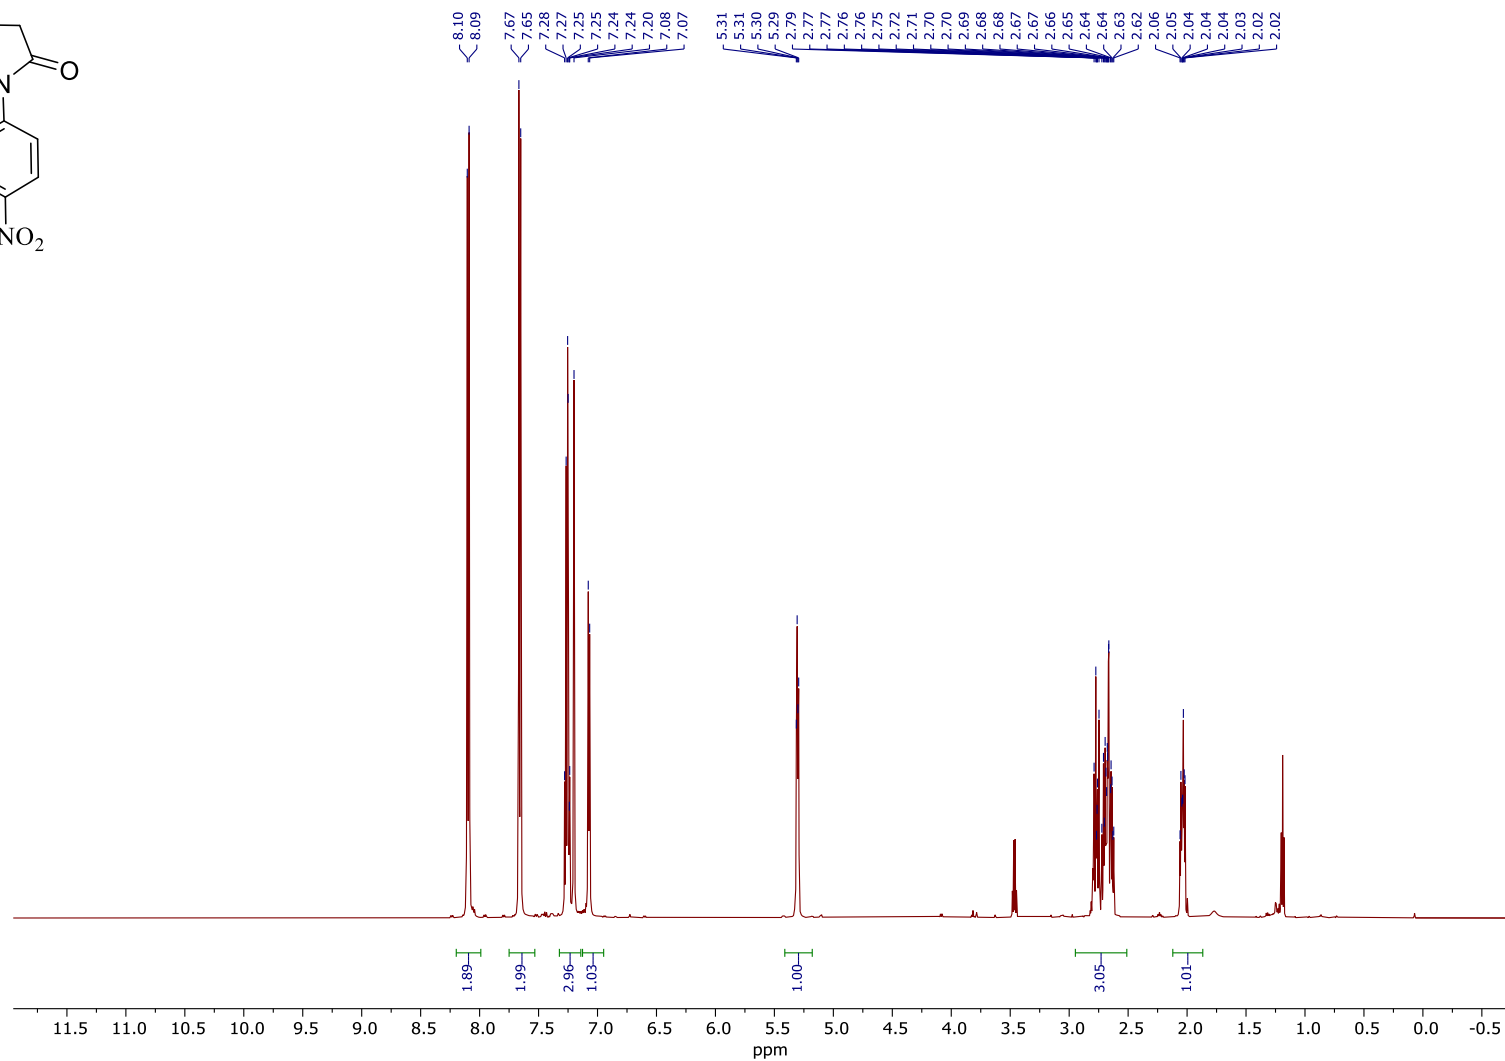

**5-(3-Chlorophenyl)-1-(4-nitrophenyl)pyrrolidin-2-one (2e)**

$^{13}\text{C}$  NMR ( $\text{CDCl}_3$ , 150 MHz)

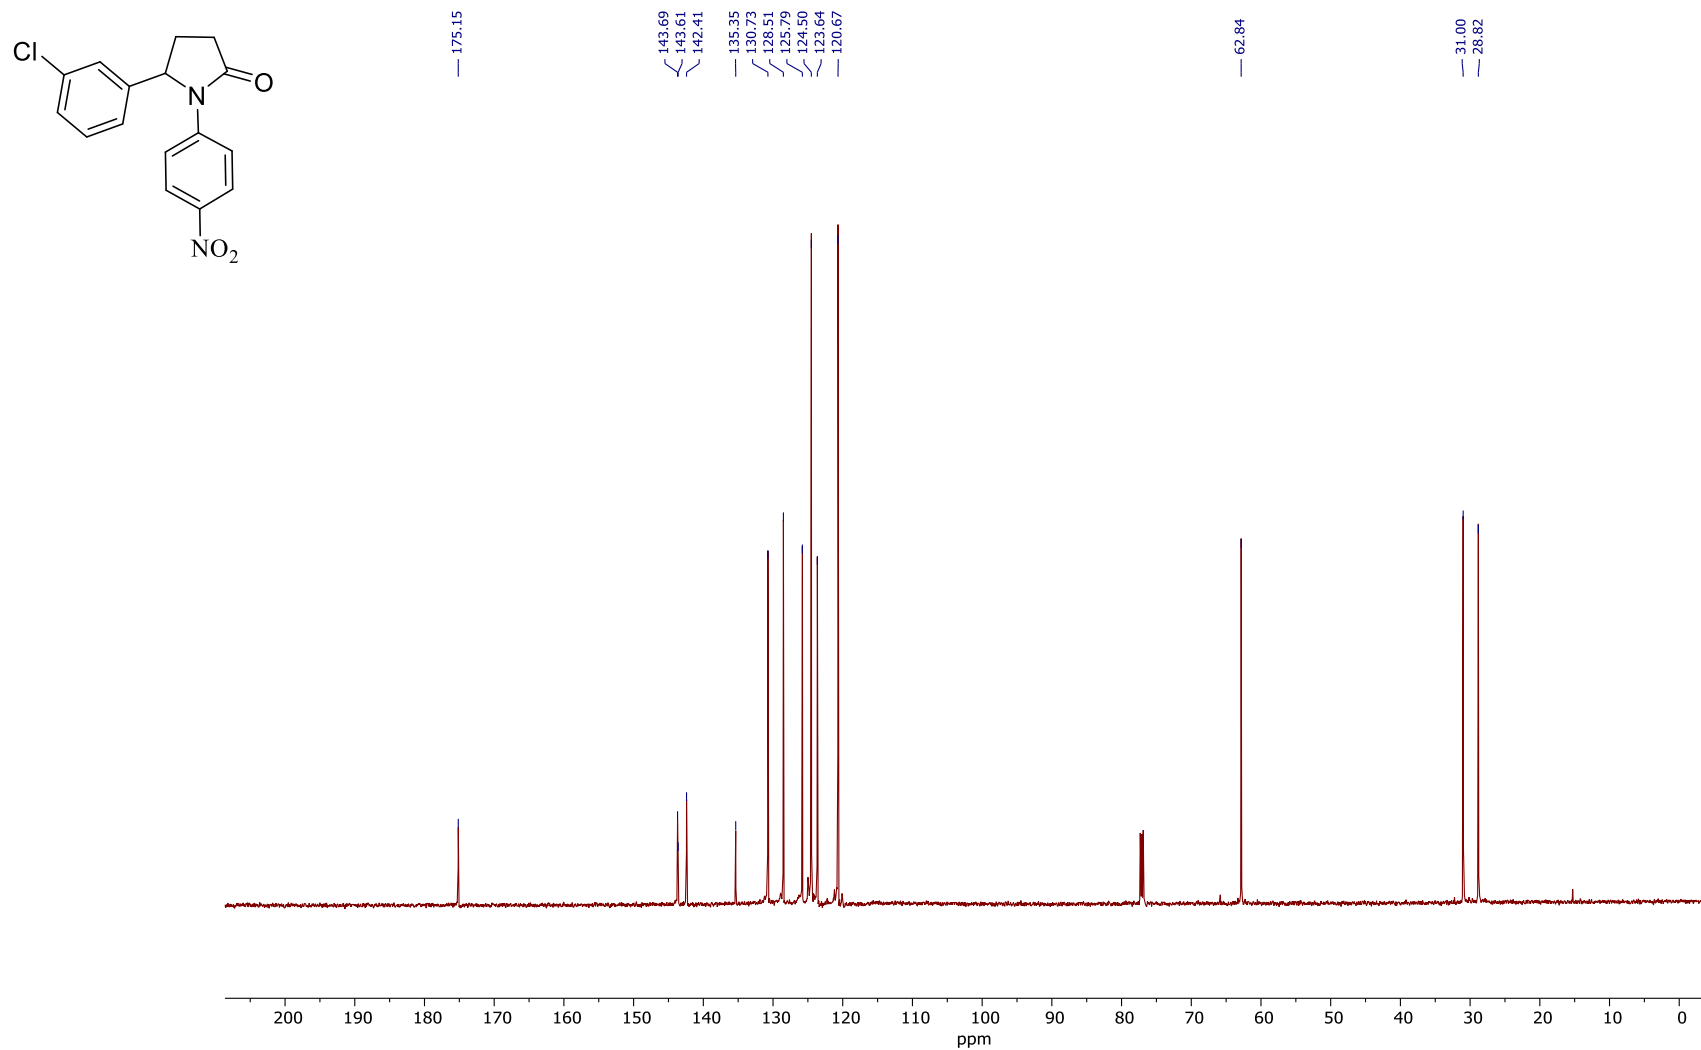

**5-(3-Chlorophenyl)-1-(4-nitrophenyl)pyrrolidin-2-one (2e)**

HSQC  $^1\text{H}$ - $^{13}\text{C}$  ( $\text{CDCl}_3$ )

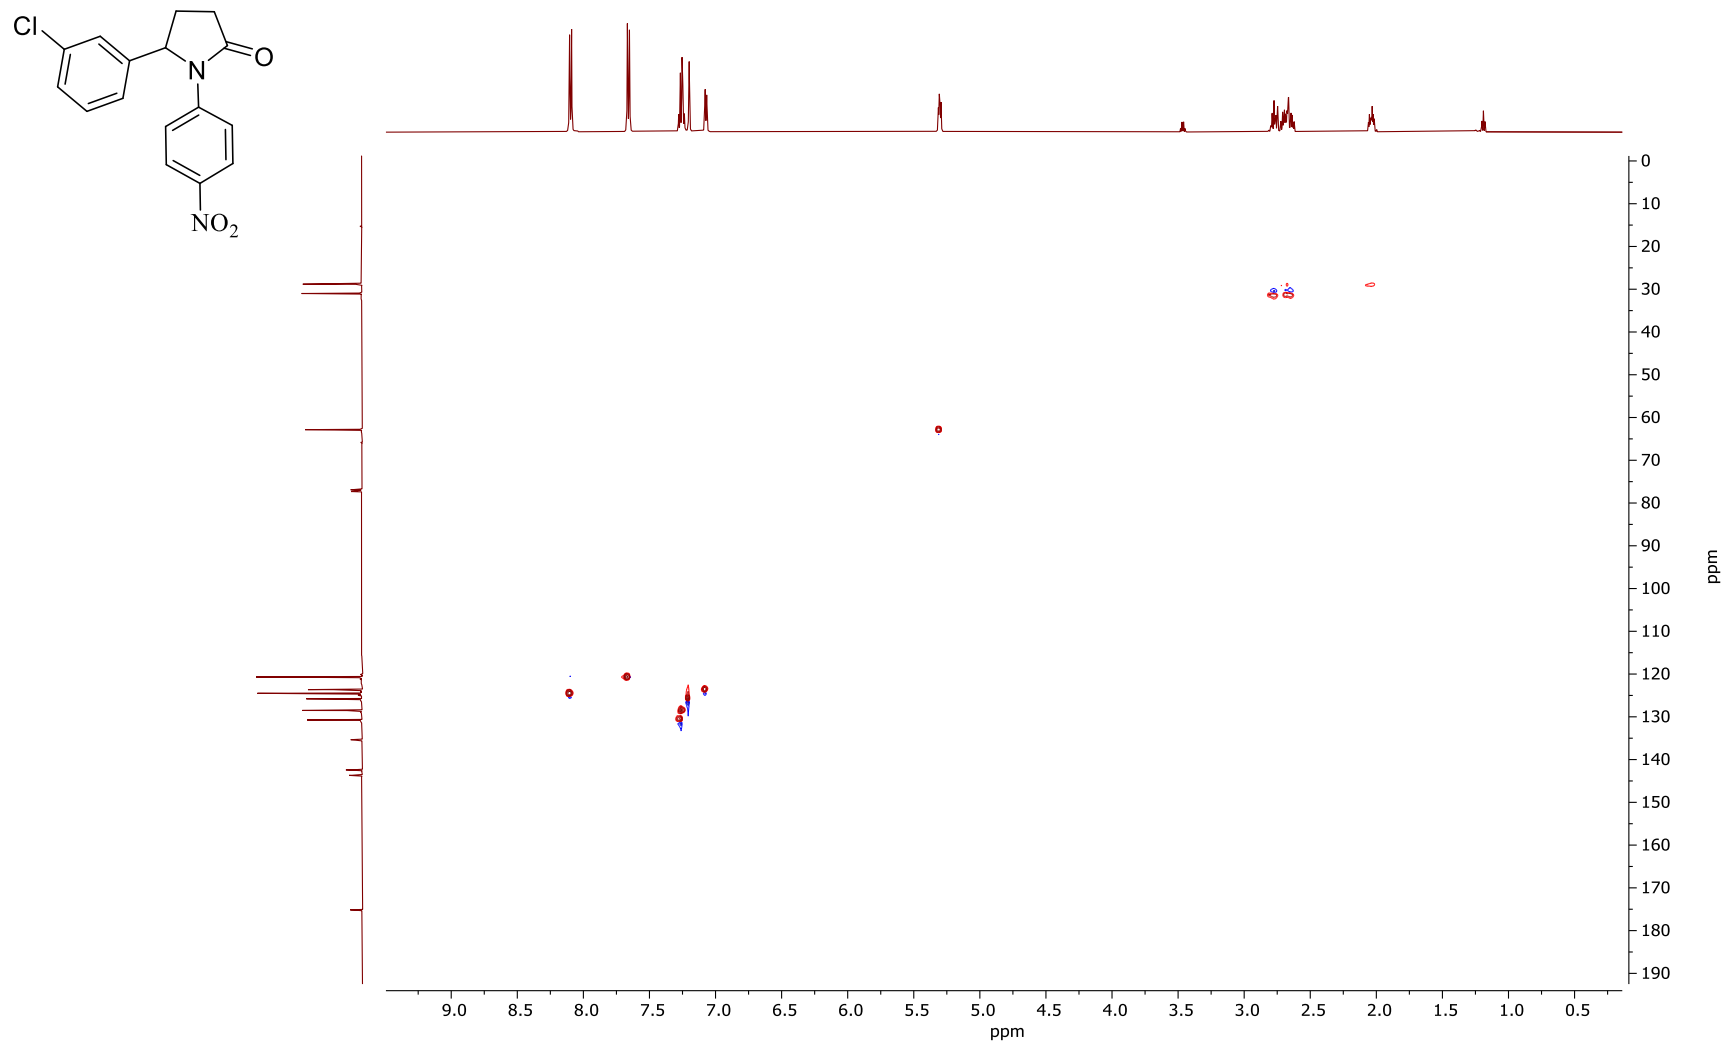

**1-(3,4-Dimethoxyphenyl)-5-(5-methylfuran-2-yl)pyrrolidin-2-one (2f)**

<sup>1</sup>H NMR (CDCl<sub>3</sub>, 600 MHz)

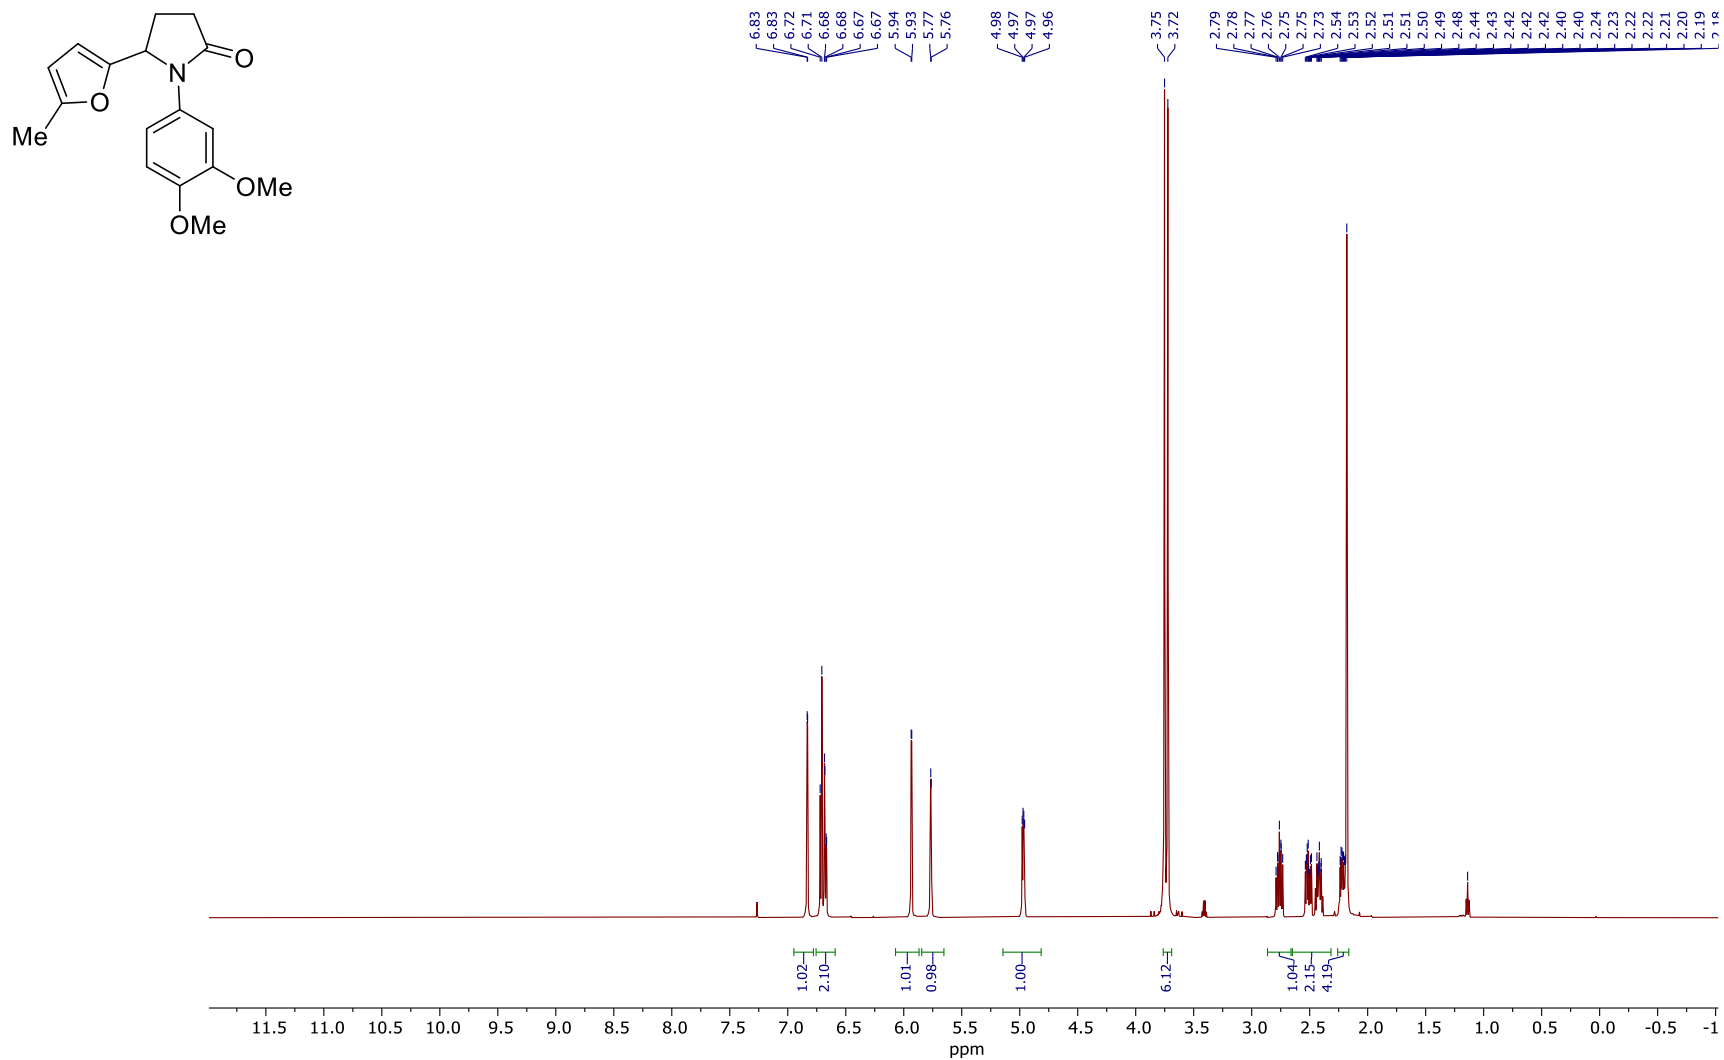

**1-(3,4-Dimethoxyphenyl)-5-(5-methylfuran-2-yl)pyrrolidin-2-one (2f)**

$^{13}\text{C}$  NMR ( $\text{CDCl}_3$ , 150 MHz)

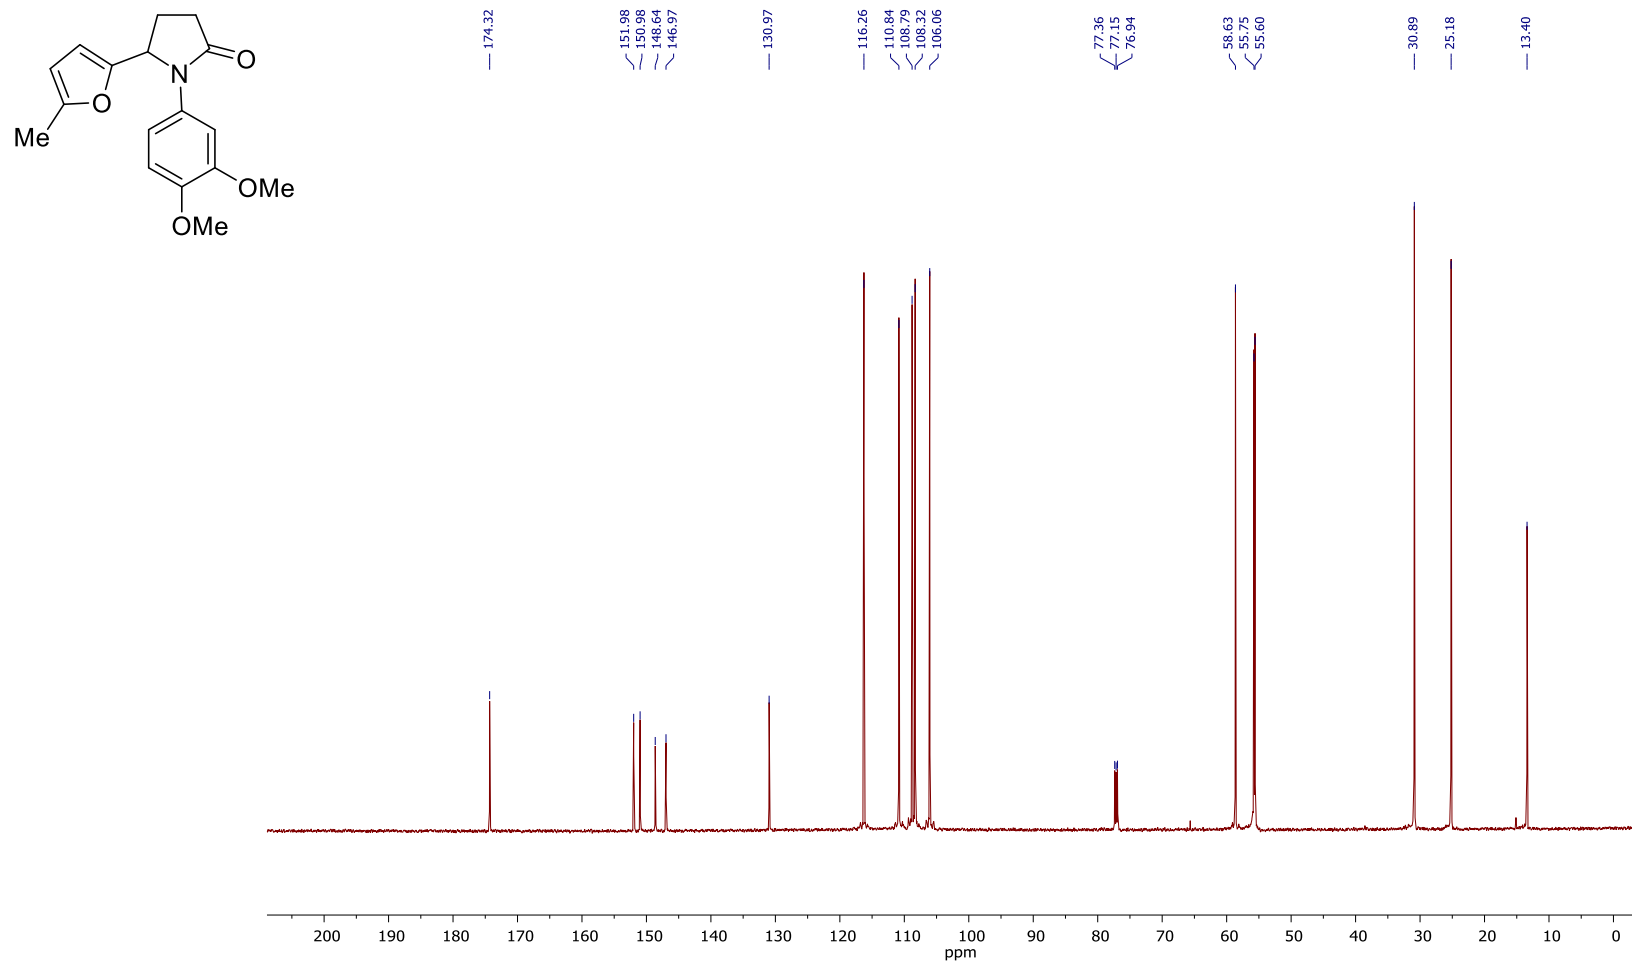

**1-(3,4-Dimethoxyphenyl)-5-(5-methylfuran-2-yl)pyrrolidin-2-one (2f)**

HSQC  $^1\text{H}$ - $^{13}\text{C}$  ( $\text{CDCl}_3$ )

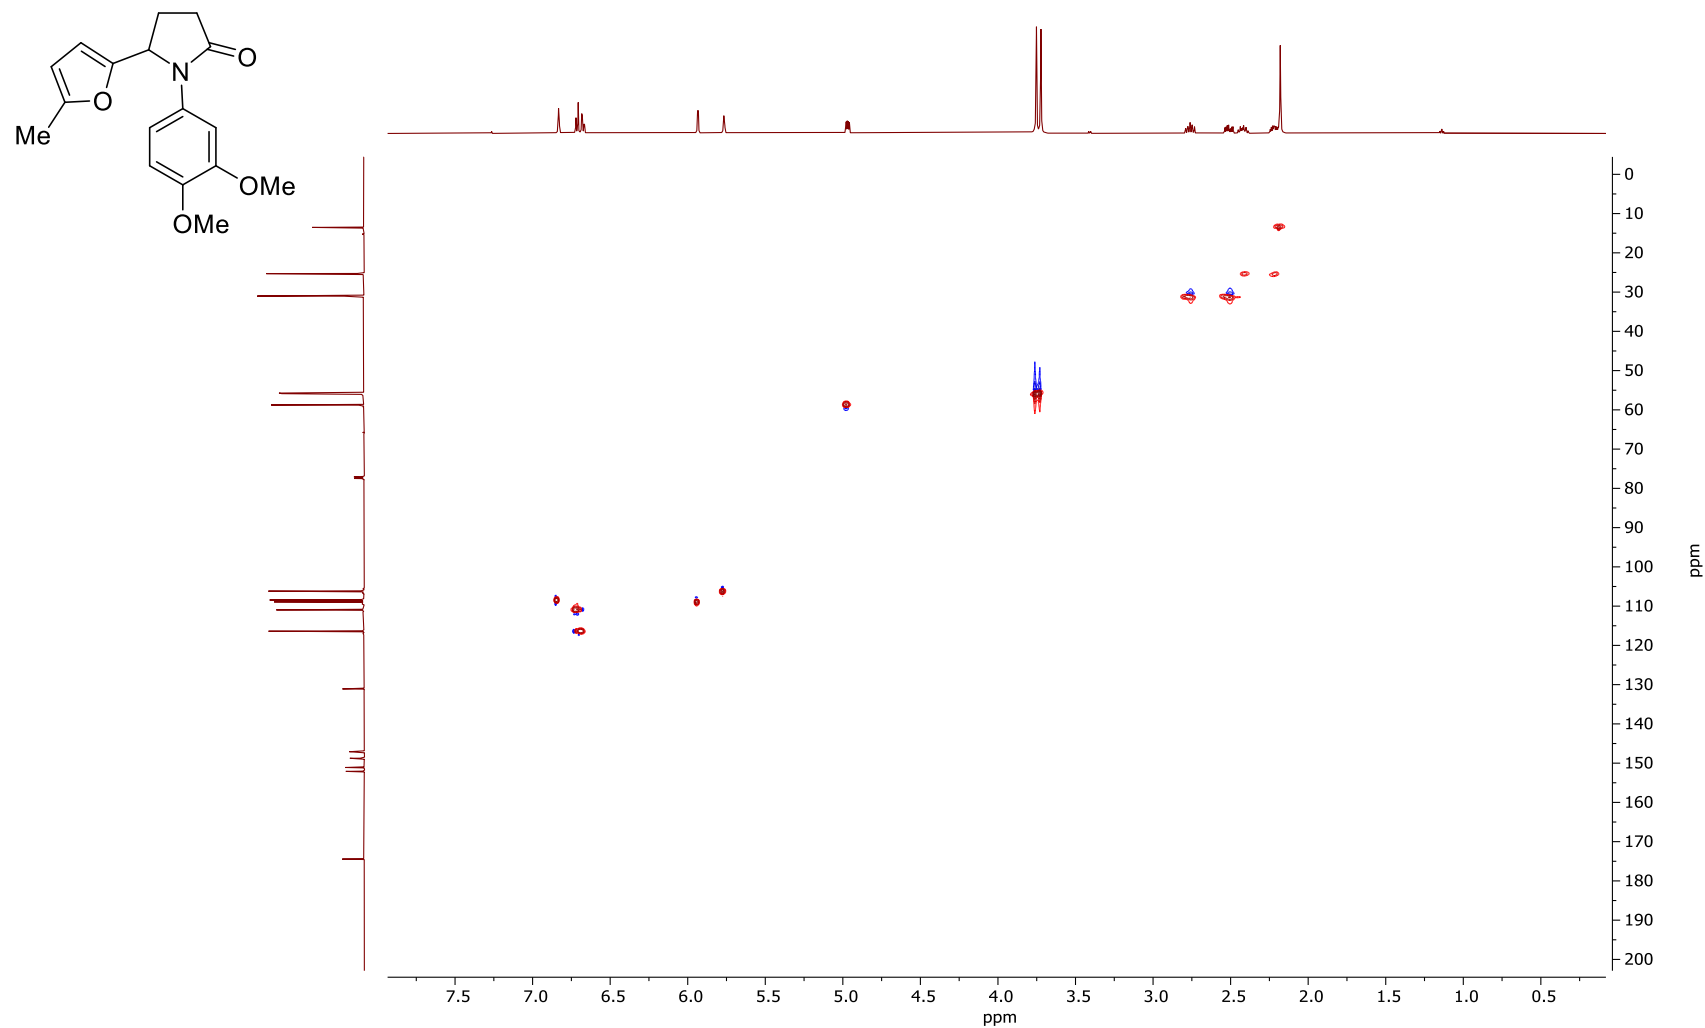

**1-(3,4-Dimethoxyphenyl)-5-(5-methylfuran-2-yl)pyrrolidin-2-one (2f)**

HMBC  $^1\text{H}$ - $^{13}\text{C}$  ( $\text{CDCl}_3$ )

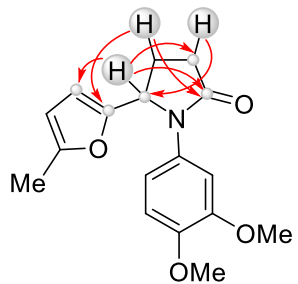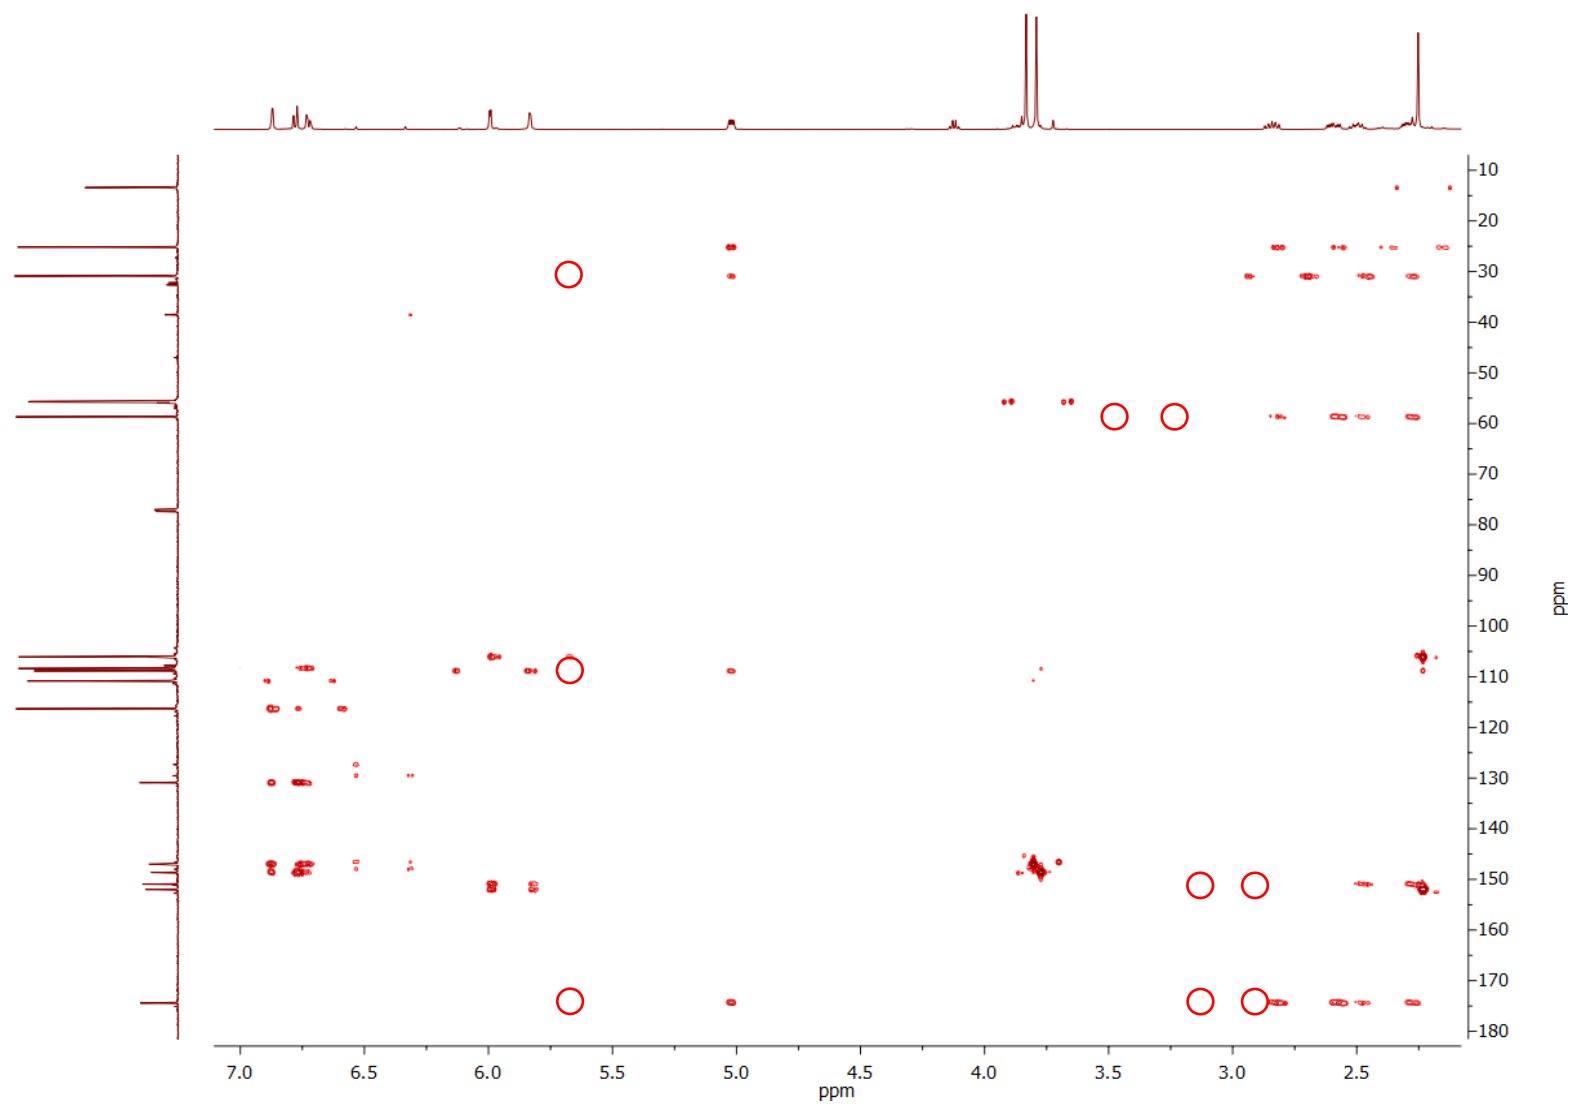



**1-(2-Bromo-4-methylphenyl)-5-(thiophen-2-yl)pyrrolidin-2-one (2g)**

$^1\text{H}$  NMR ( $\text{CDCl}_3$ , 600 MHz)

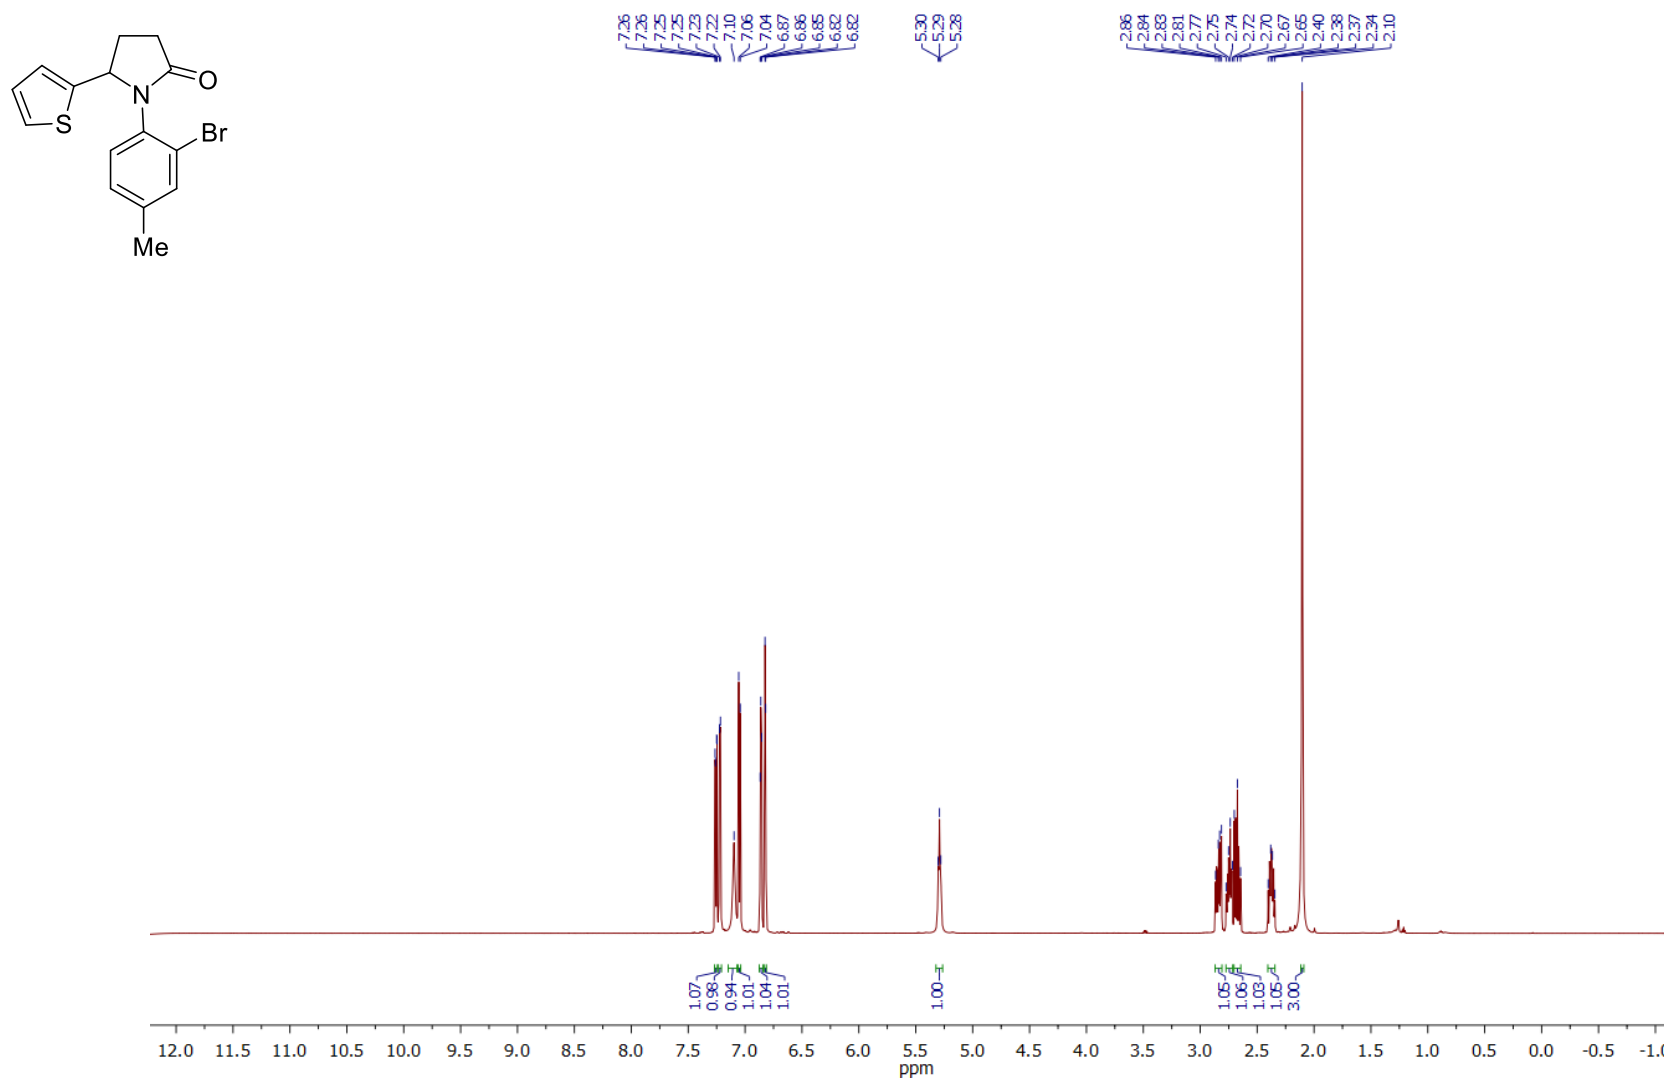

**1-(2-Bromo-4-methylphenyl)-5-(thiophen-2-yl)pyrrolidin-2-one (2g)**

$^{13}\text{C}$  NMR ( $\text{CDCl}_3$ , 150 MHz)

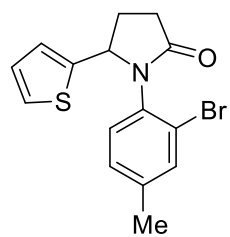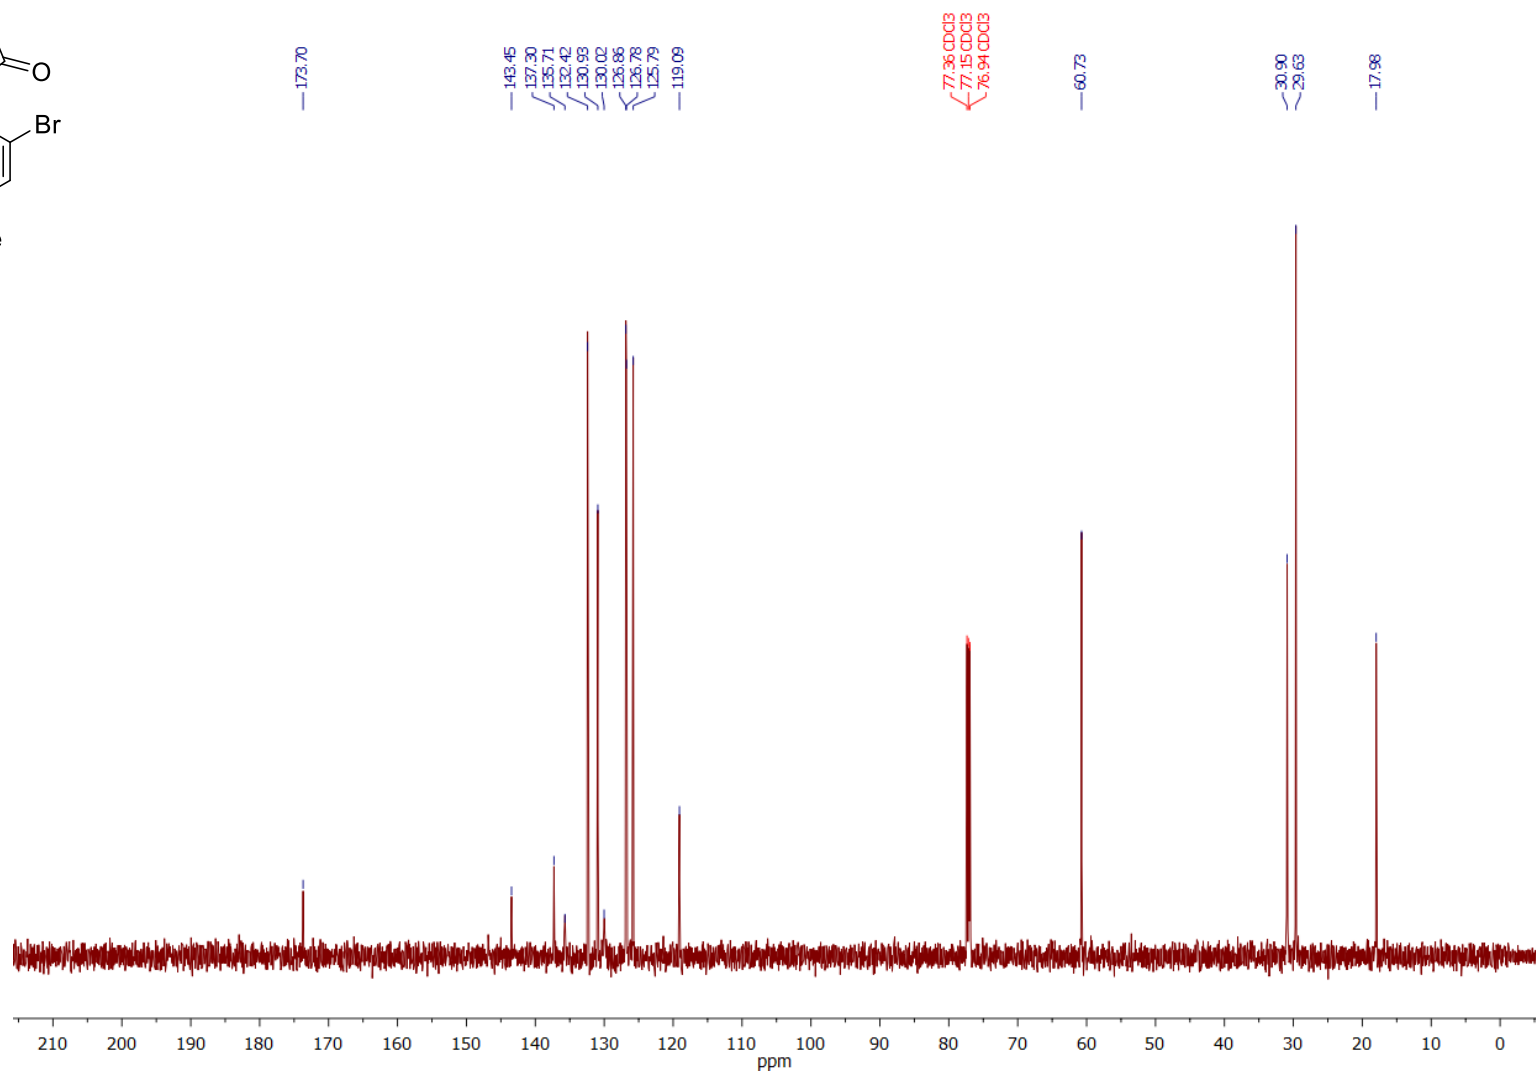

**1-(2-Bromo-4-methylphenyl)-5-(thiophen-2-yl)pyrrolidin-2-one (2g)**

HSQC  $^1\text{H}$ - $^{13}\text{C}$  ( $\text{CDCl}_3$ )

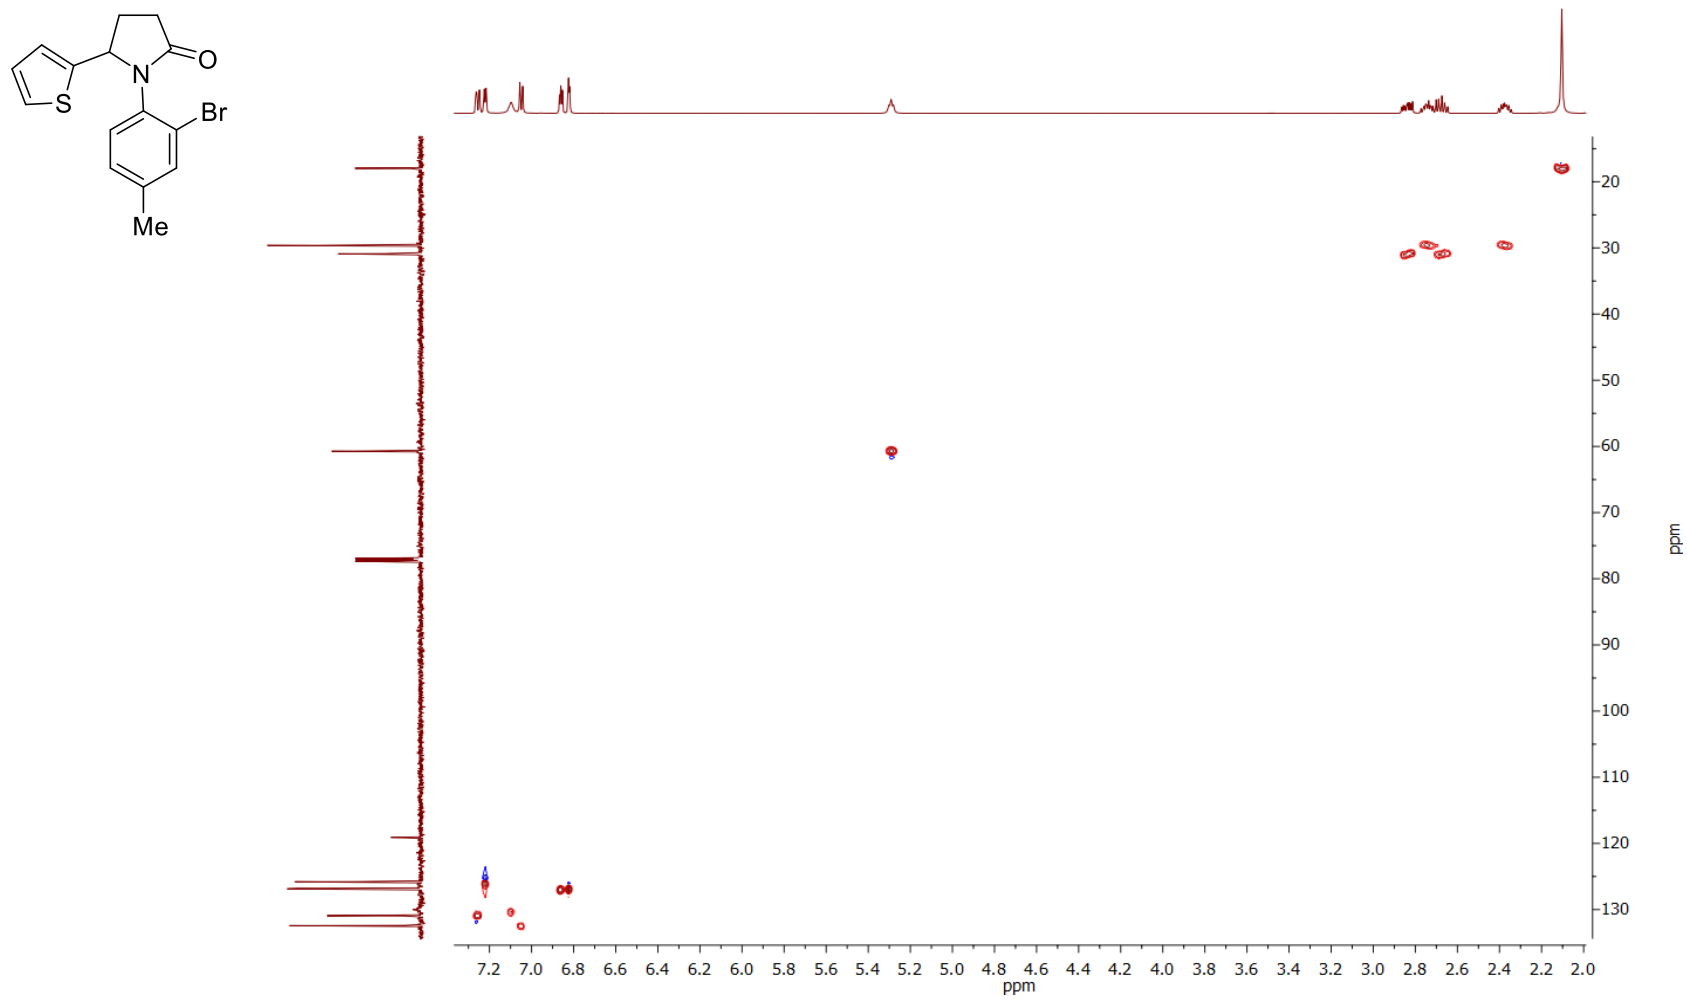

**(*E*)-1-Phenyl-5-styrylpyrrolidin-2-one (2h)**

<sup>1</sup>H NMR (CDCl<sub>3</sub>, 600 MHz)

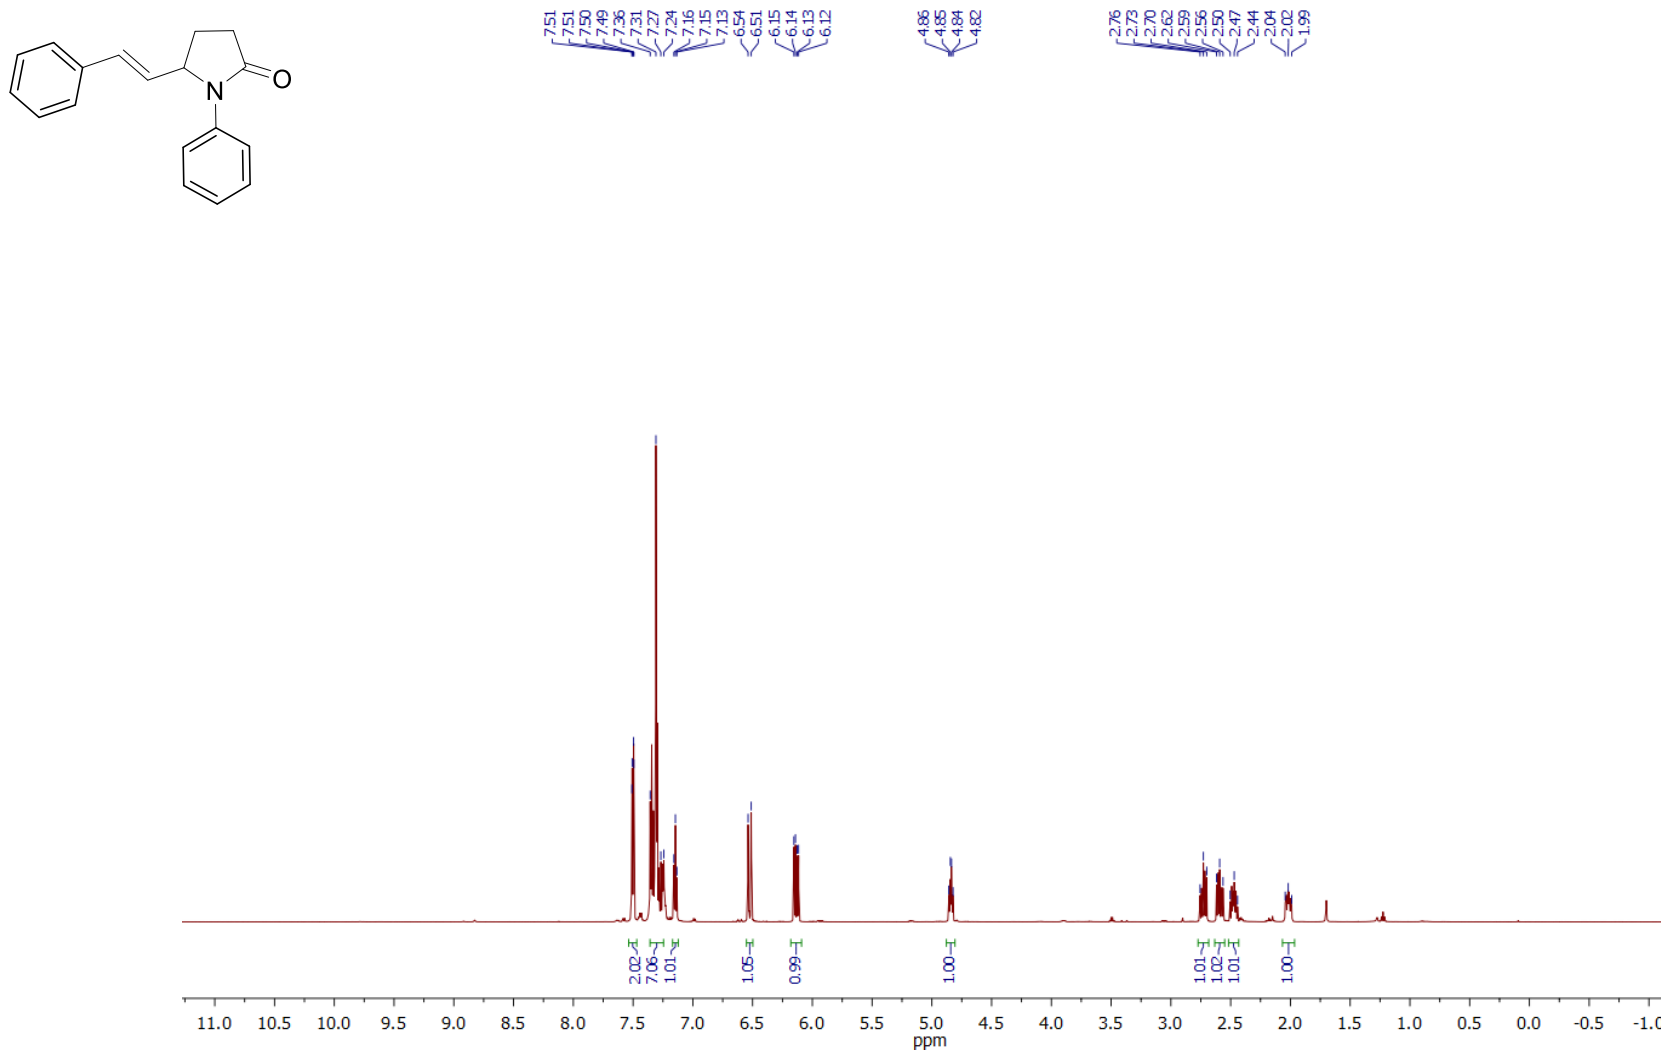

**(E)-1-Phenyl-5-styrylpyrrolidin-2-one (2h)**

$^{13}\text{C}$  NMR ( $\text{CDCl}_3$ , 150 MHz)

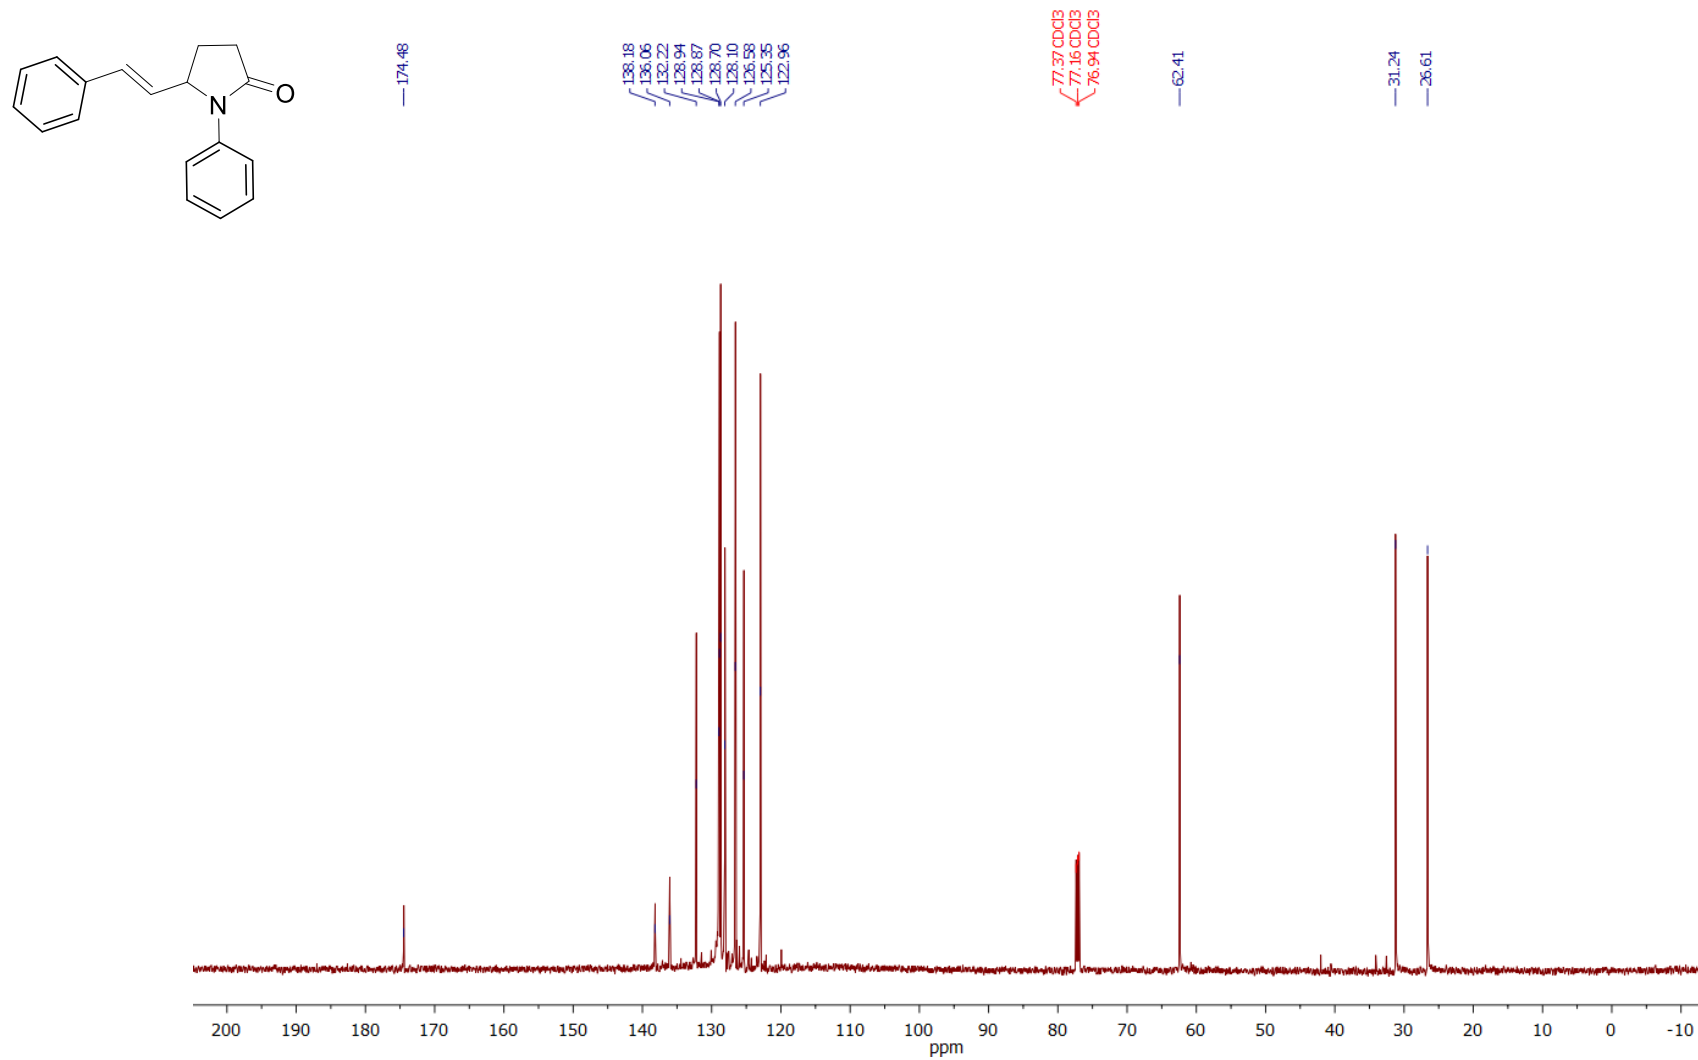

# 5-(2-Nitrophenyl)-1-phenylpyrrolidin-2-one (2i)

$^1\text{H}$  NMR ( $\text{CDCl}_3$ , 600 MHz)

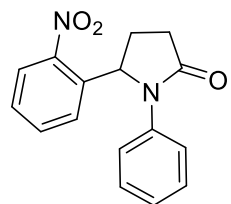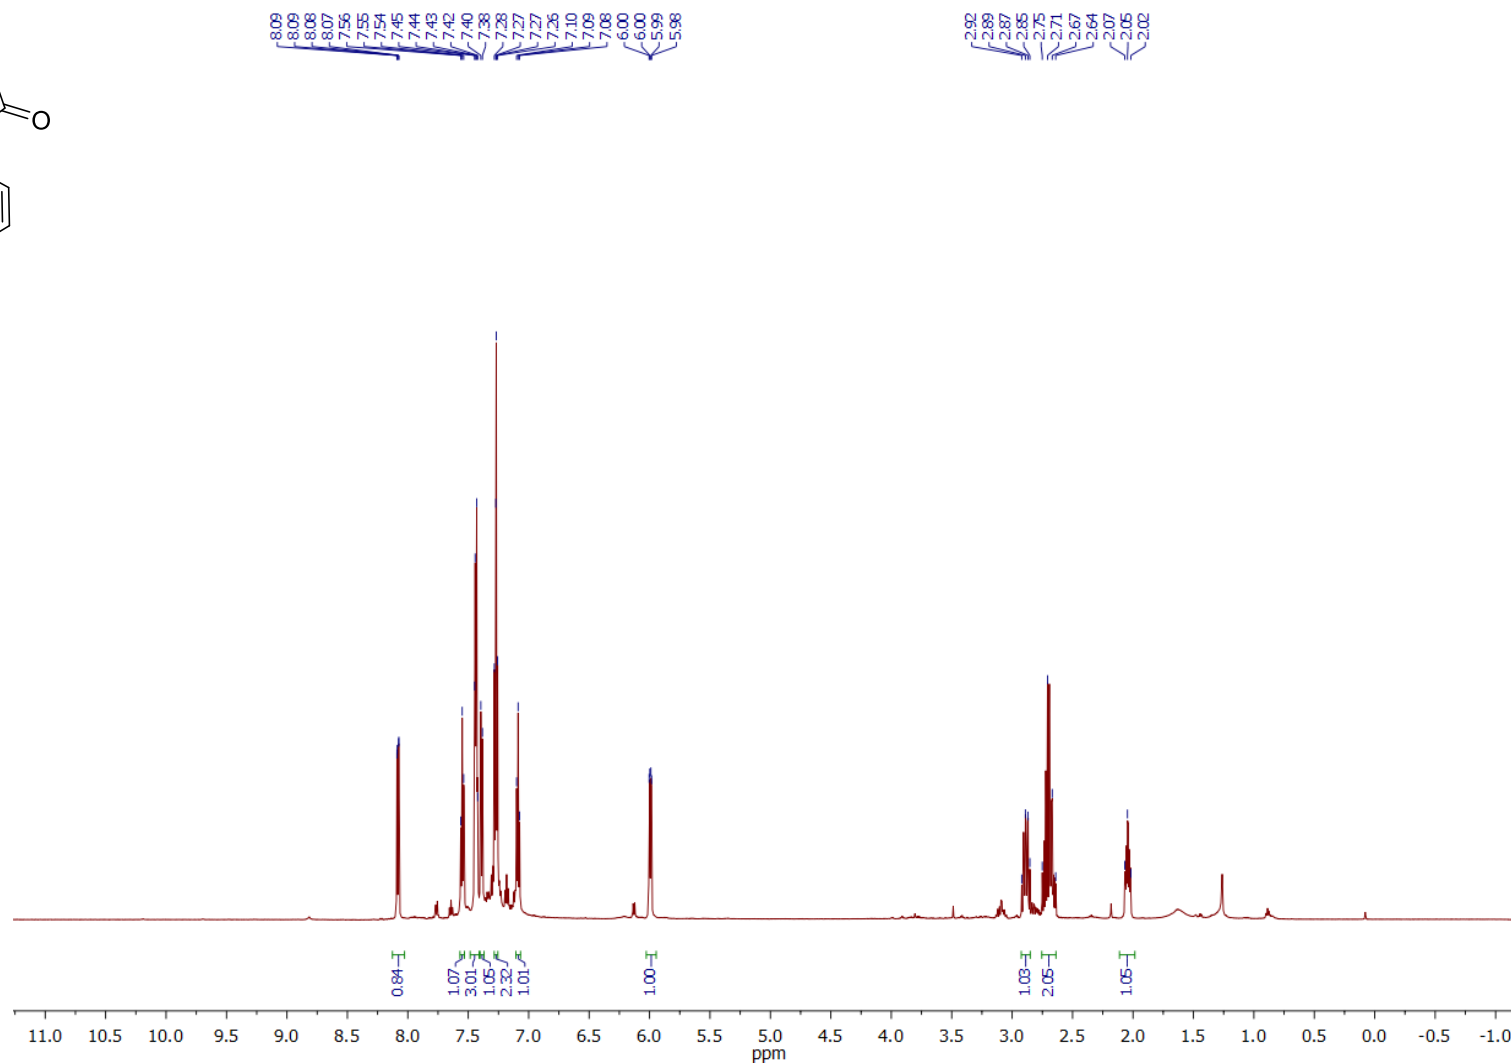

# 5-(2-Nitrophenyl)-1-phenylpyrrolidin-2-one (2i)

$^{13}\text{C}$  NMR ( $\text{CDCl}_3$ , 150 MHz)

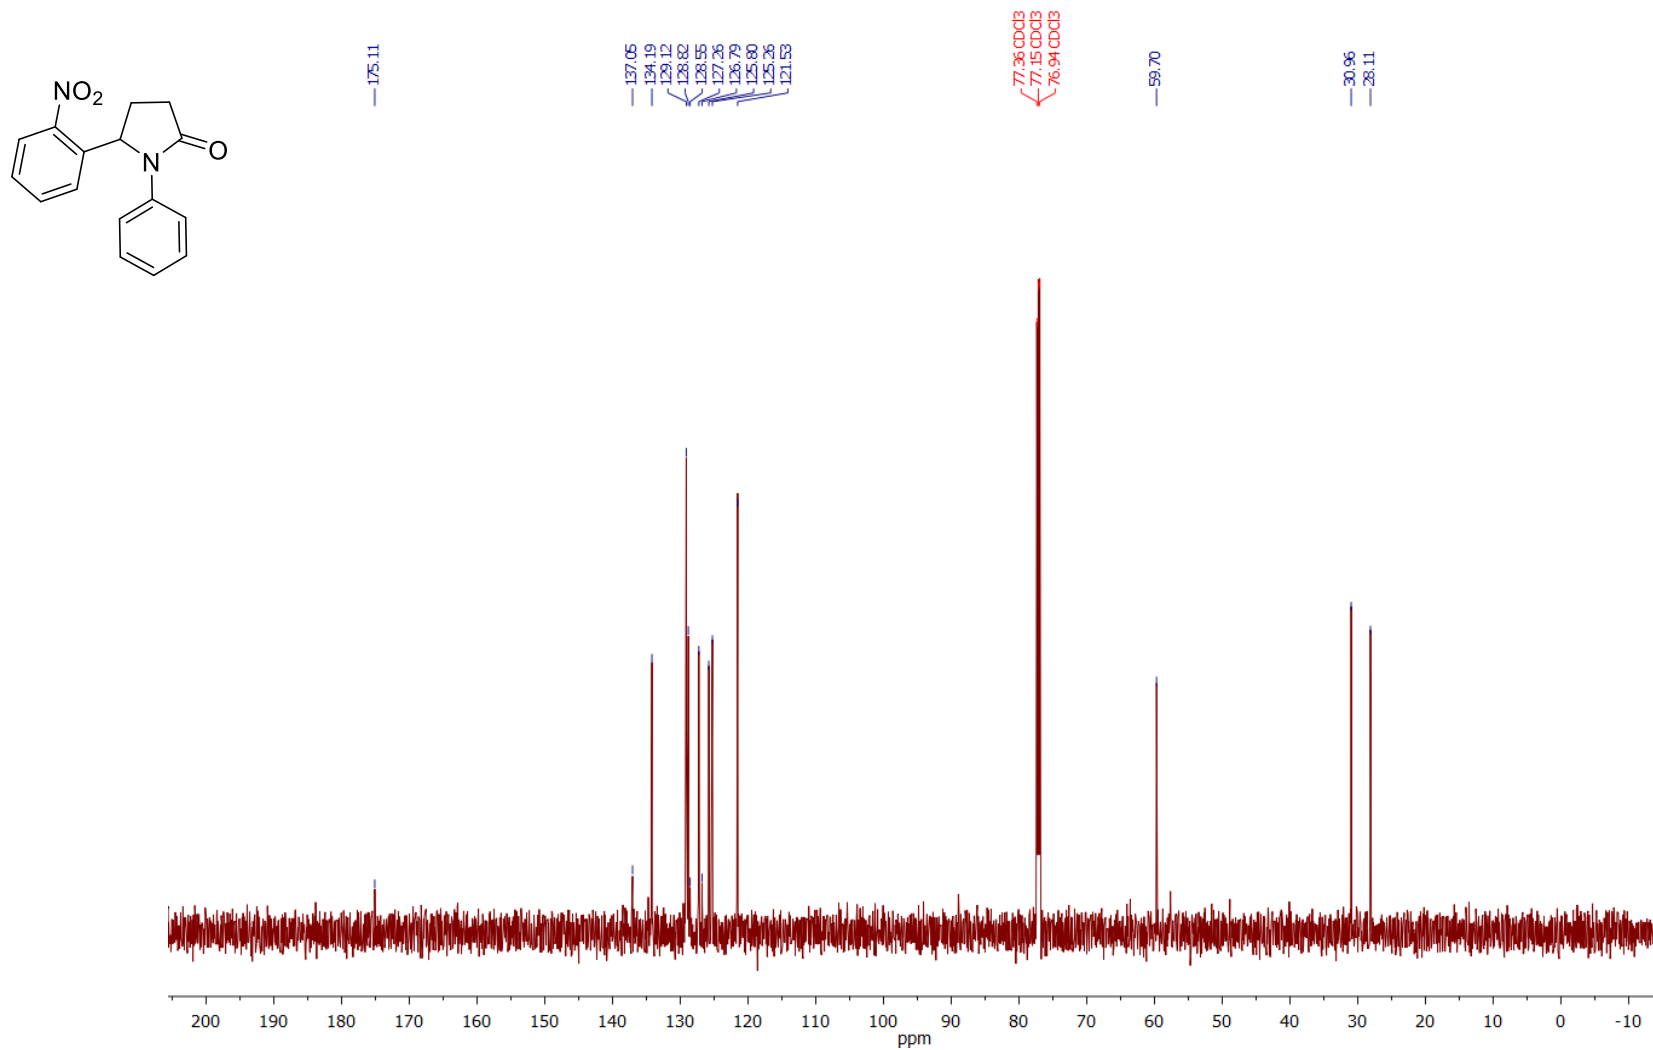

# 1-Benzyl-5-(3,4,5-trimethoxyphenyl)pyrrolidin-2-one (3a)

<sup>1</sup>H NMR (CDCl<sub>3</sub>, 600 MHz)

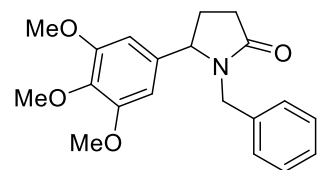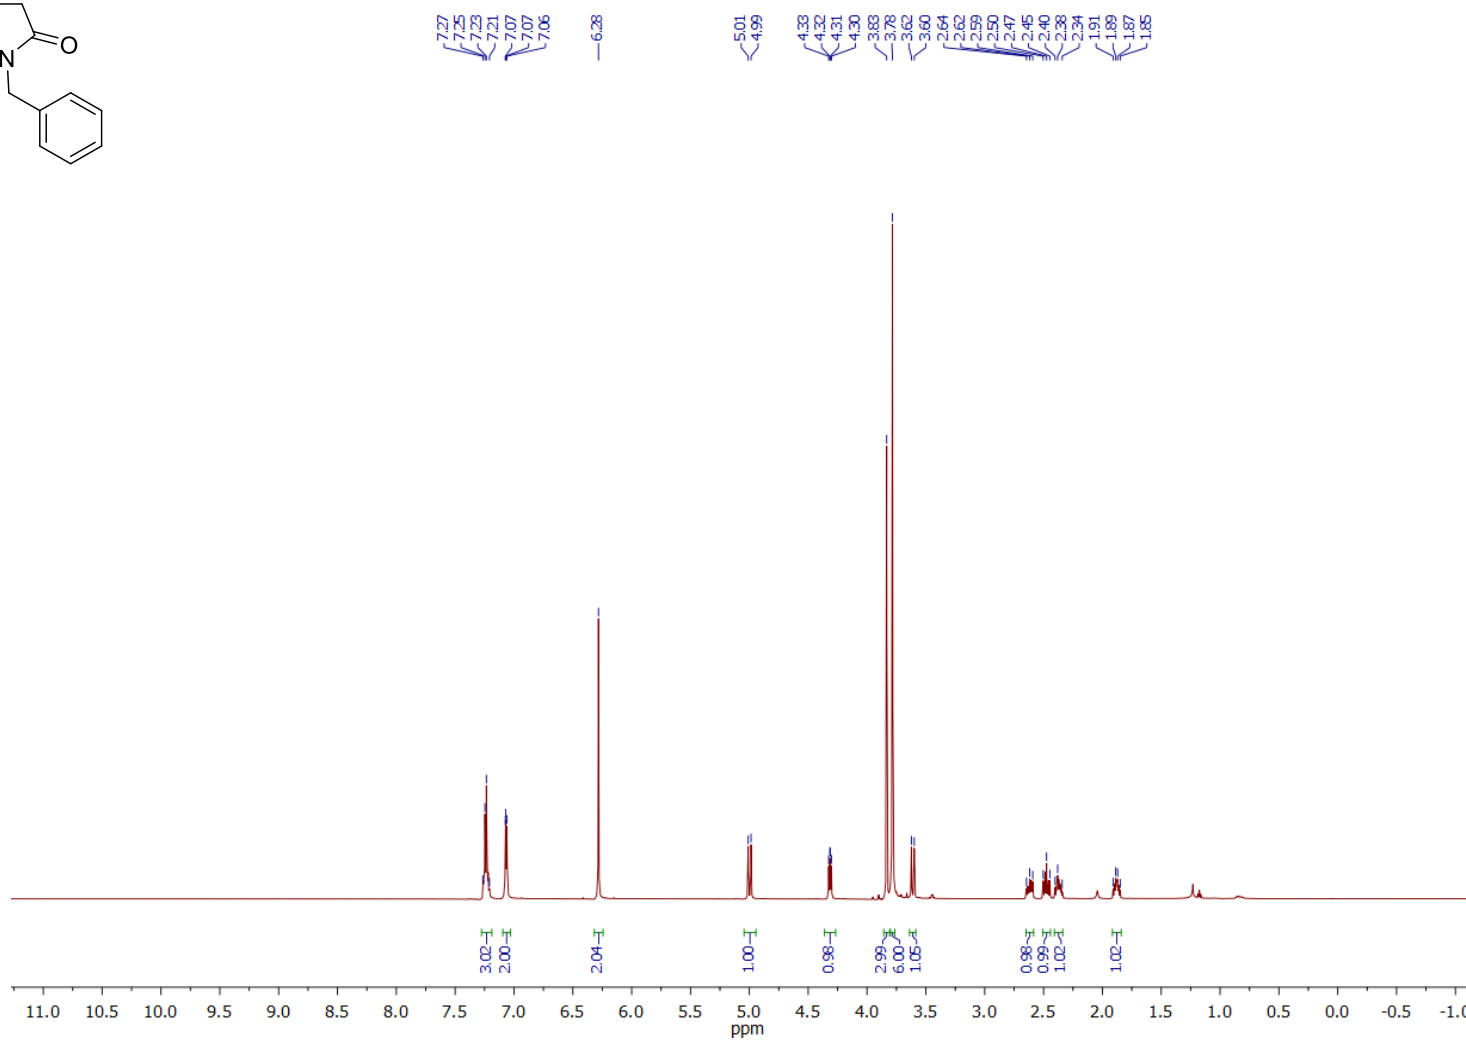



# 1-Benzyl-5-(3,4,5-trimethoxyphenyl)pyrrolidin-2-one (3a)

$^{13}\text{C}$  NMR ( $\text{CDCl}_3$ , 150 MHz)

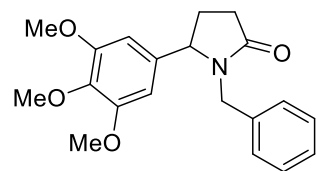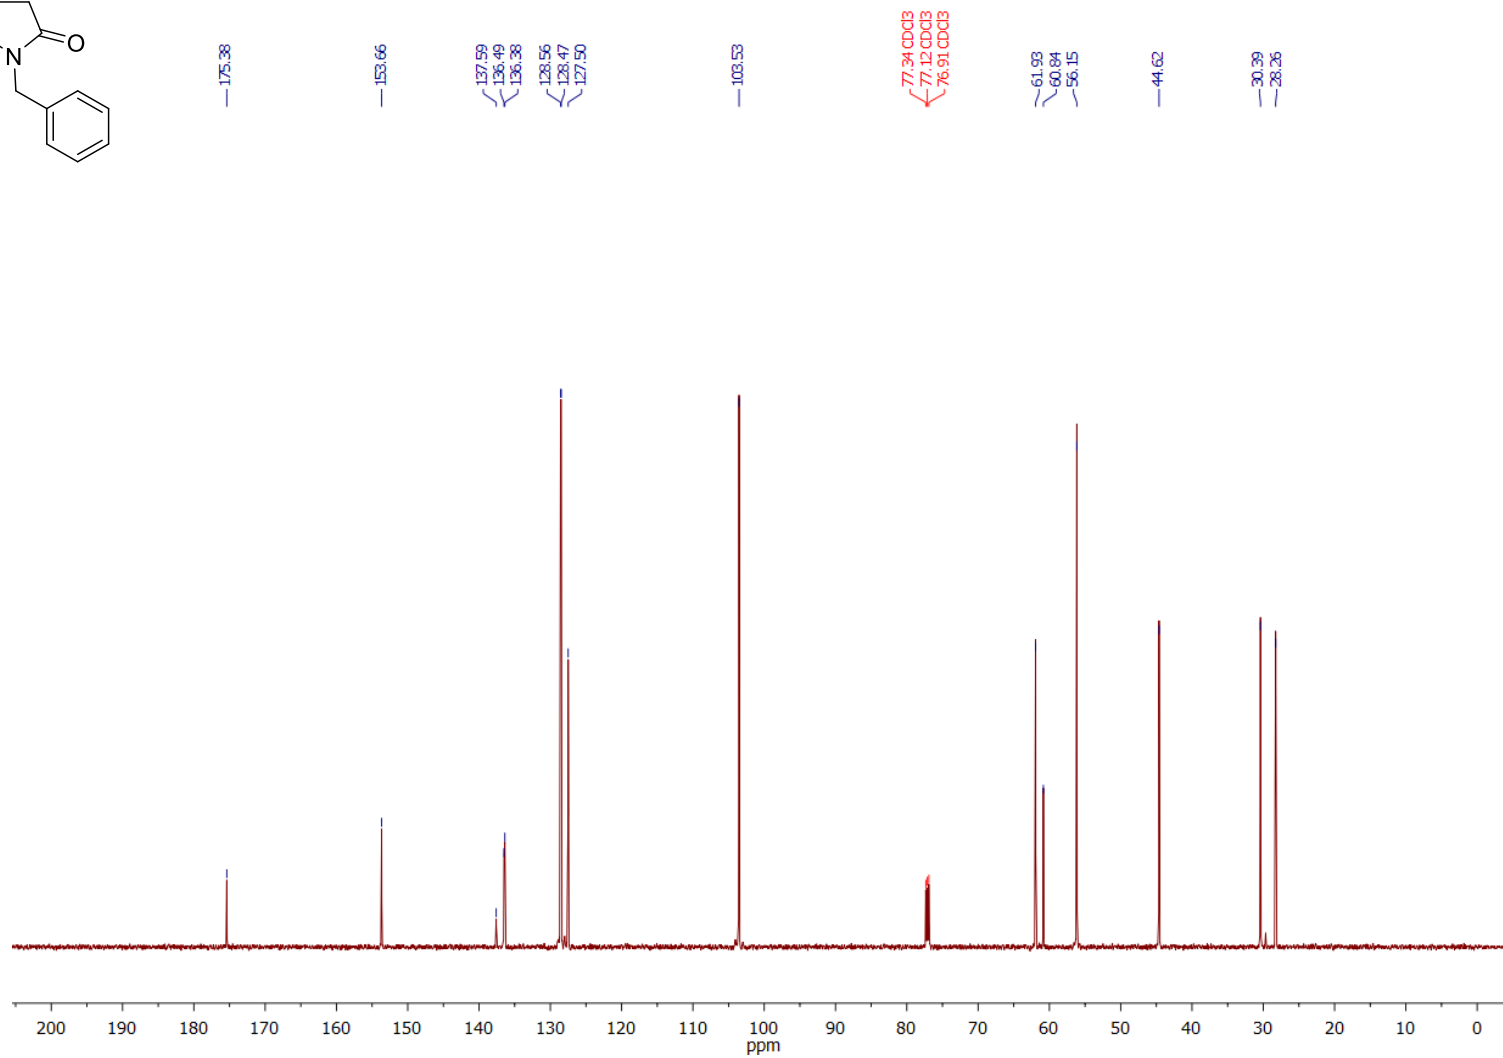

**1-Benzyl-5-(3,4,5-trimethoxyphenyl)pyrrolidin-2-one (3a)**

HSQC  $^1\text{H}$ - $^{13}\text{C}$  ( $\text{CDCl}_3$ )

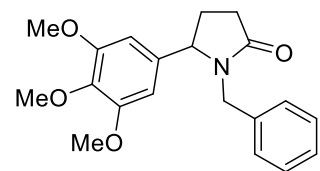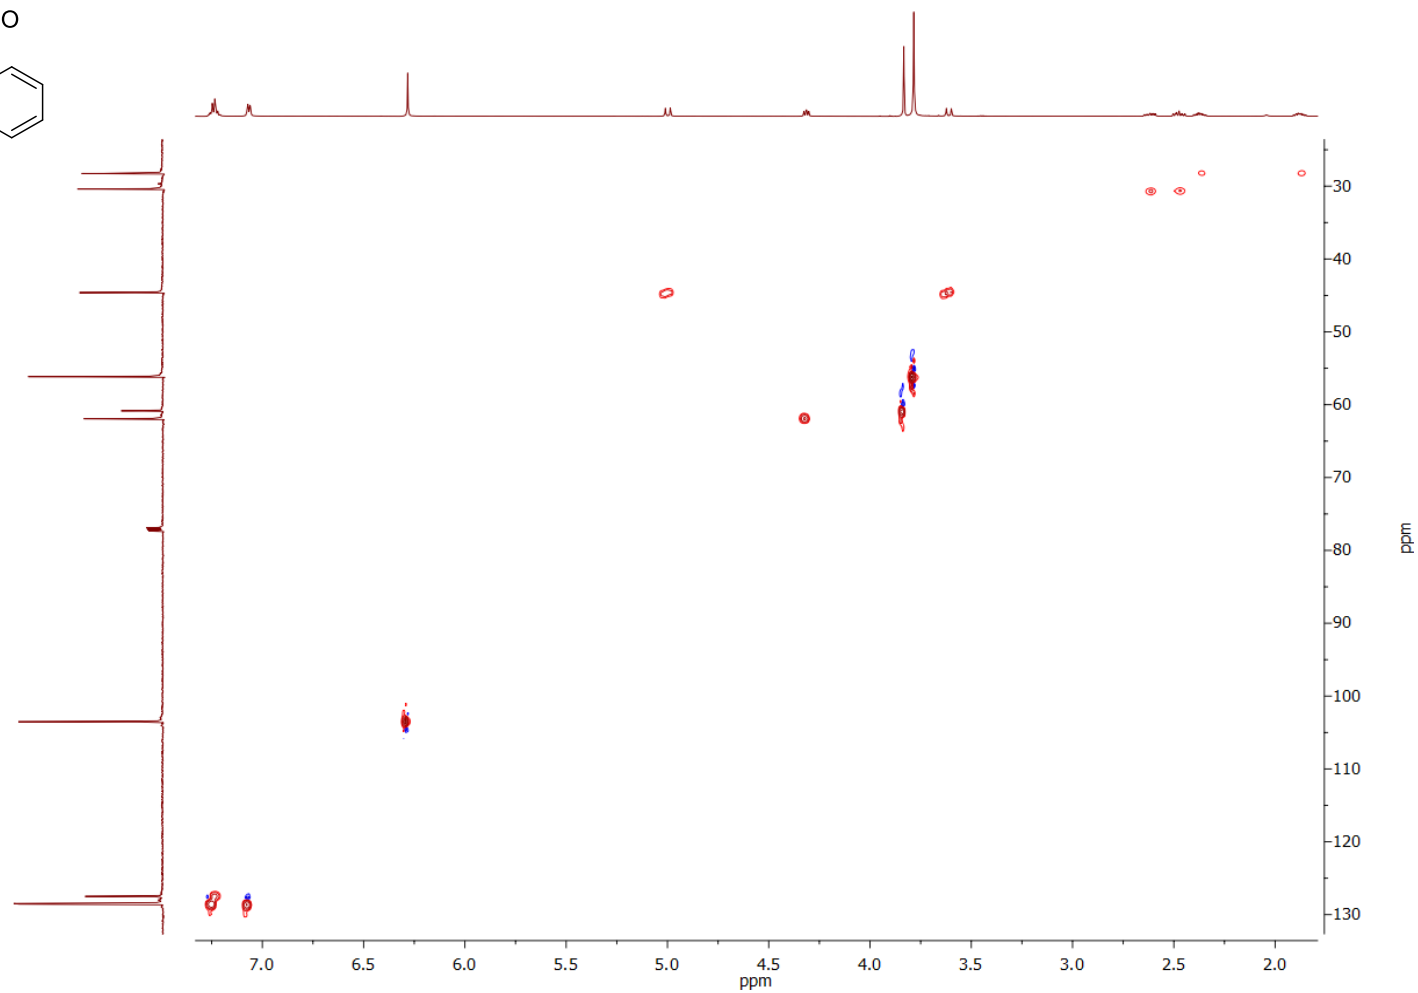

**1-(2,5-Dimethoxybenzyl)-5-(3,4-dimethoxyphenyl)pyrrolidin-2-on (3d)**

$^1\text{H}$  NMR ( $\text{CDCl}_3$ , 500 MHz)

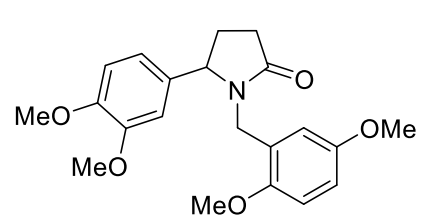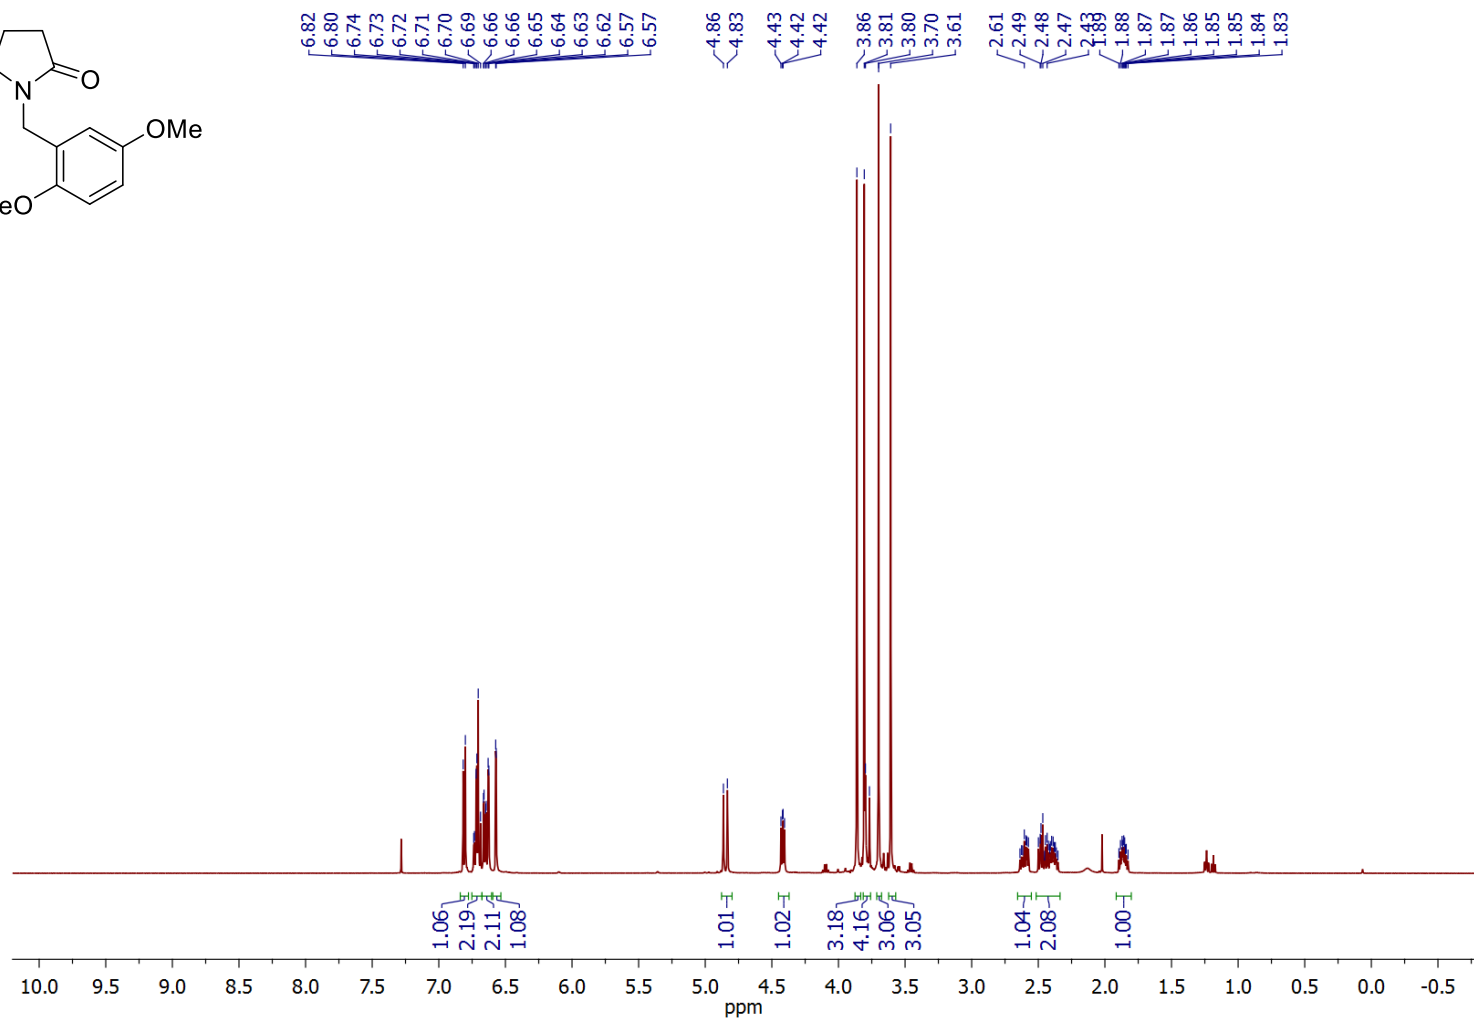

**1-(2,5-Dimethoxybenzyl)-5-(3,4-dimethoxyphenyl)pyrrolidin-2-on (3d)**

$^{13}\text{C}$  NMR ( $\text{CDCl}_3$ , 125 MHz)

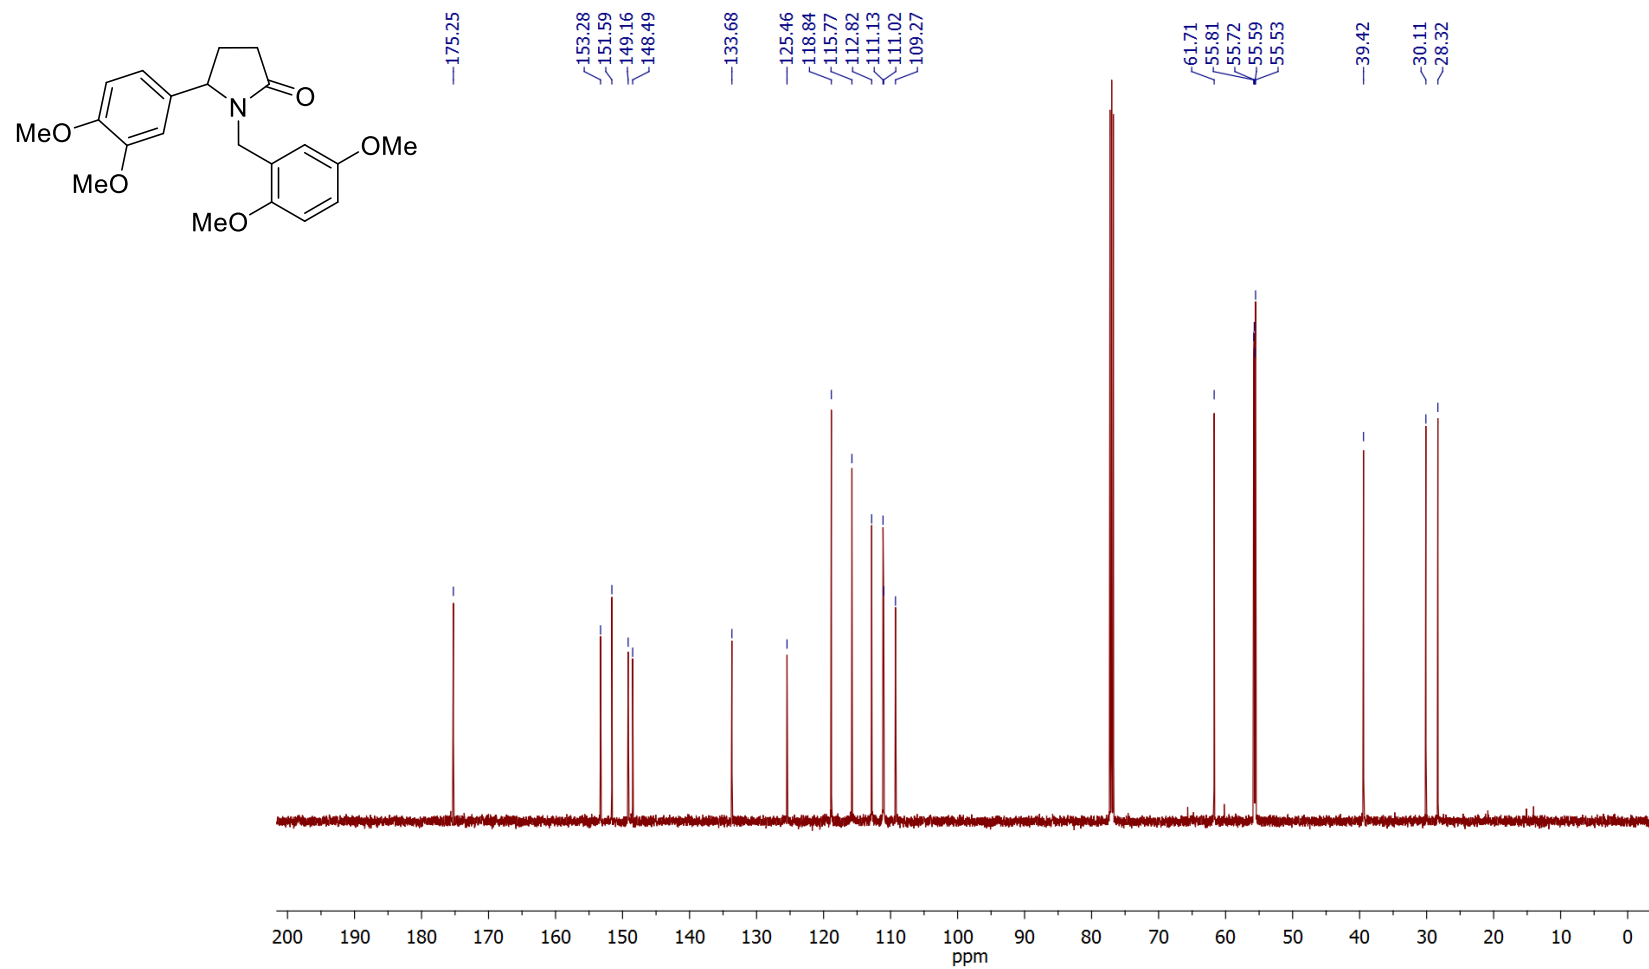

**1-(2,5-Dimethoxybenzyl)-5-(3,4-dimethoxyphenyl)pyrrolidin-2-on (3d)**

HSQC  $^1\text{H}$ - $^{13}\text{C}$  ( $\text{CDCl}_3$ )

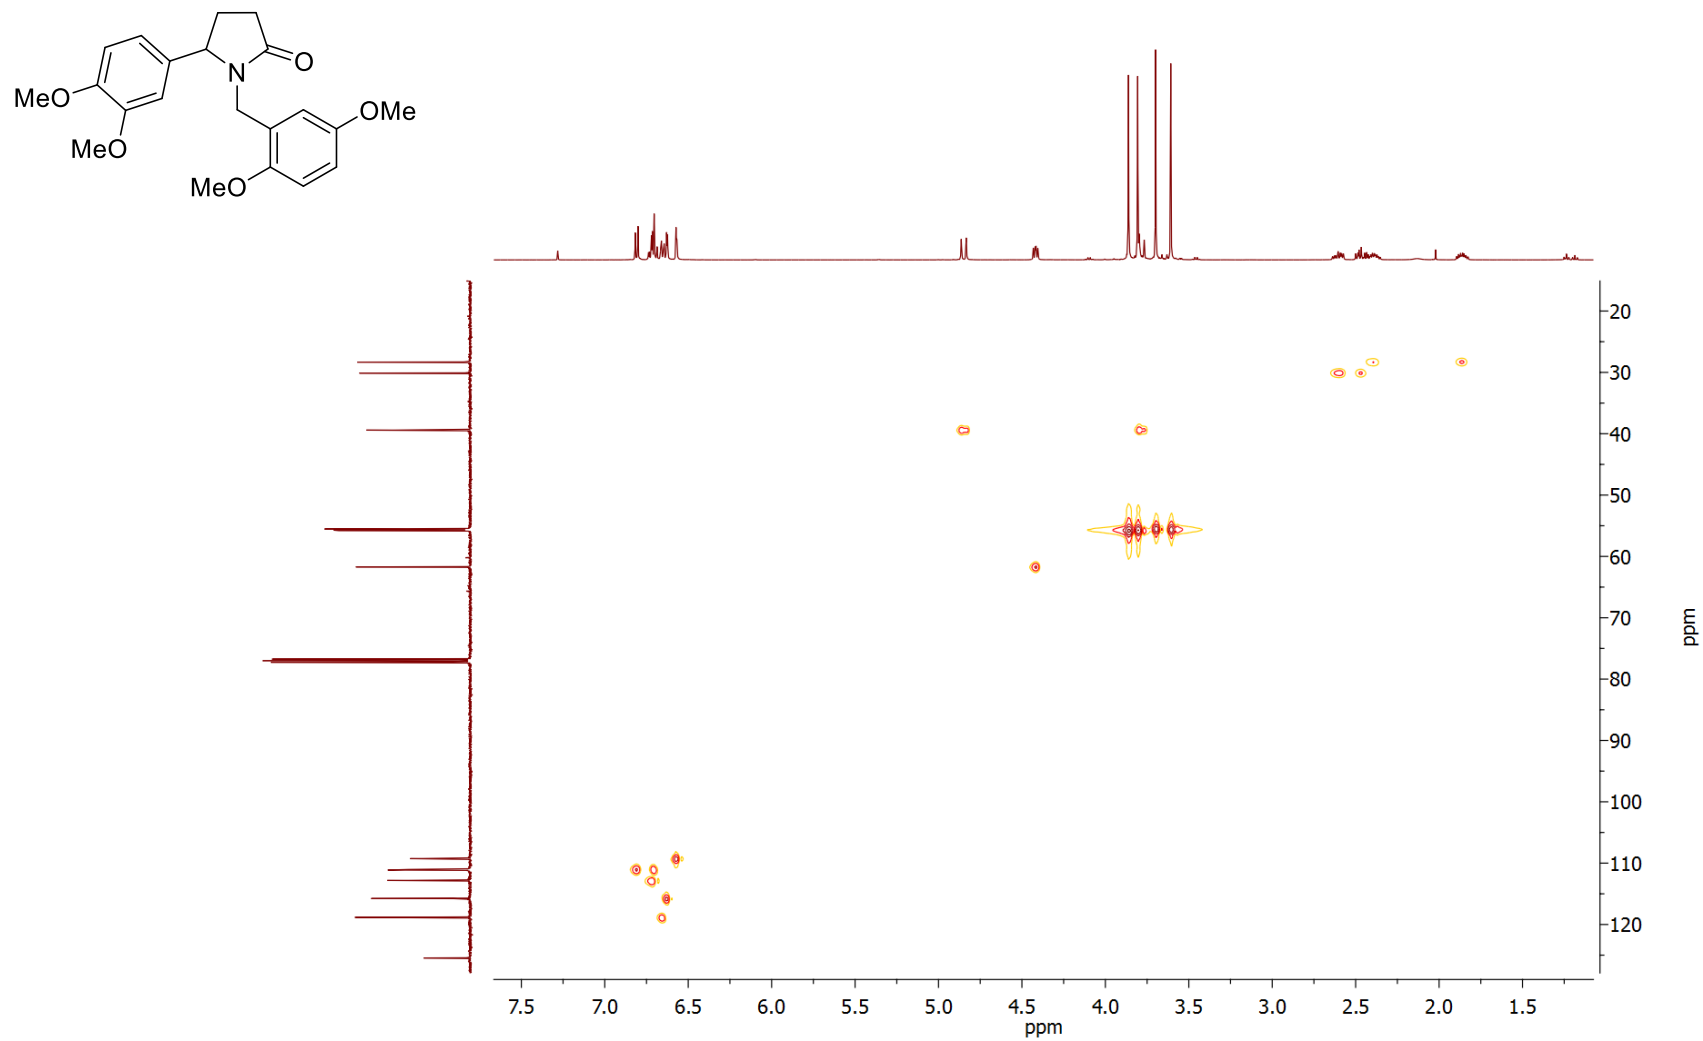

**1-Furfuryl-5-(2,4,5-trimethoxyphenyl)pyrrolidin-2-one (3e)**

$^1\text{H}$  NMR ( $\text{CDCl}_3$ , 600 MHz)

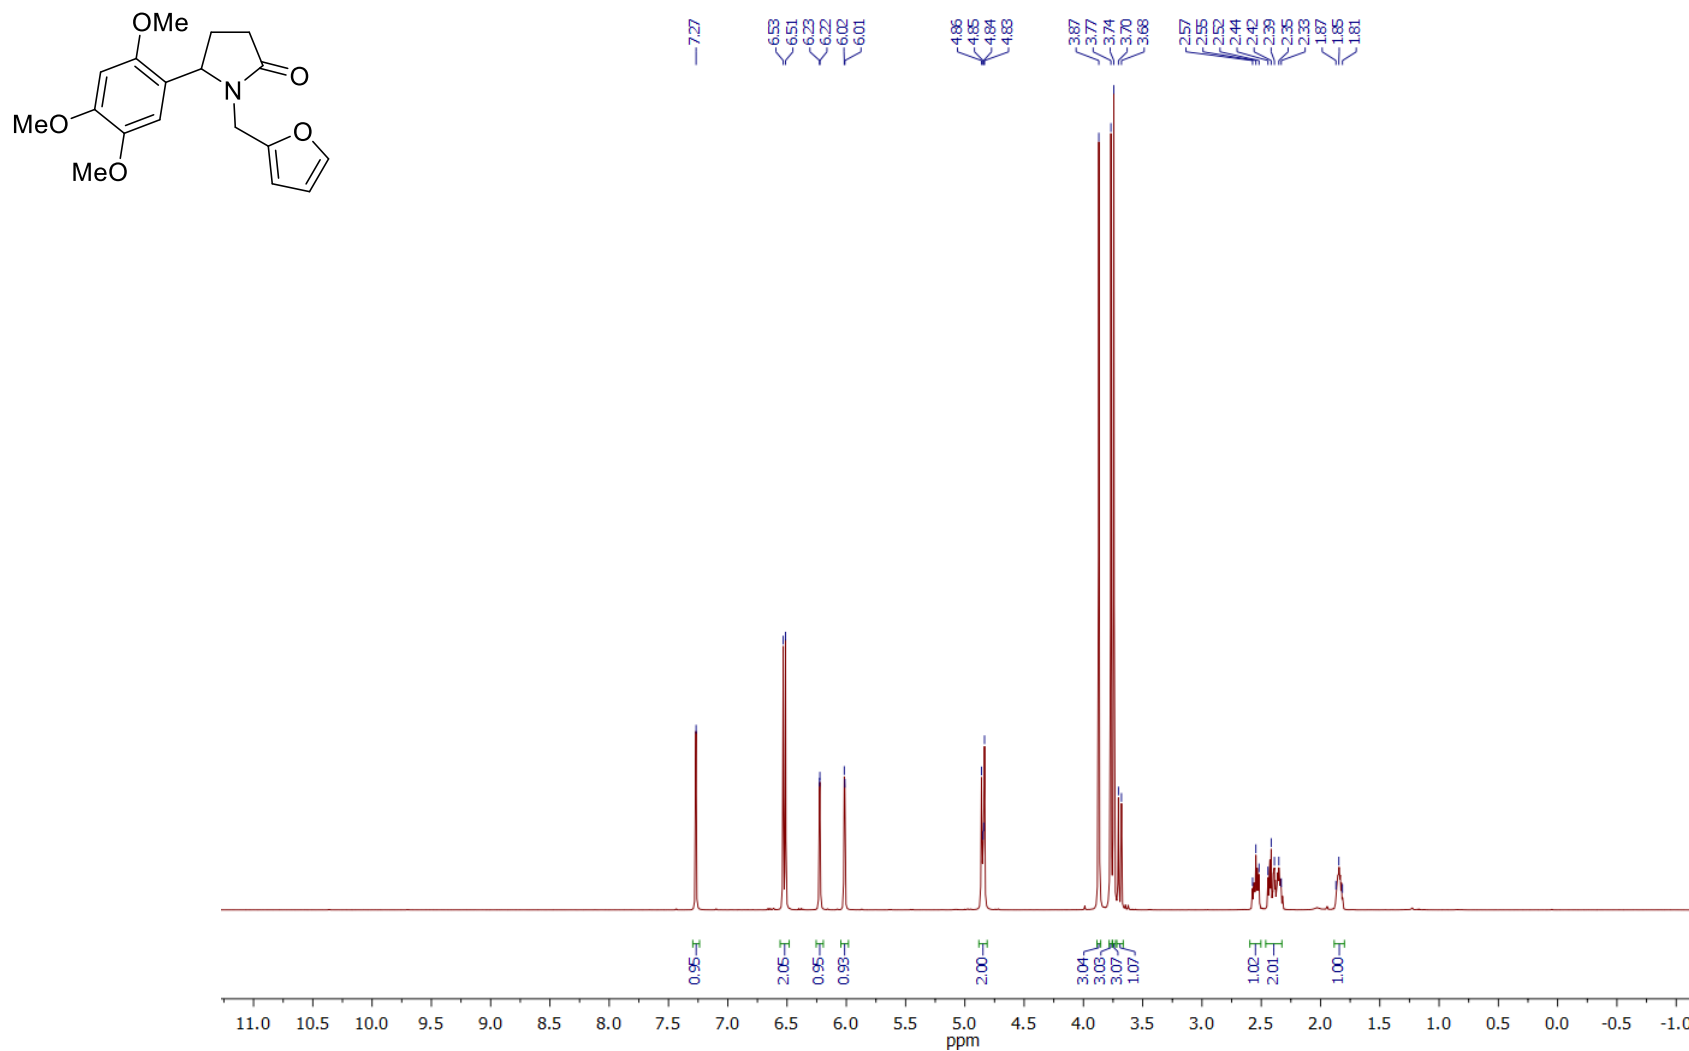

**1-Furfuryl-5-(2,4,5-trimethoxyphenyl)pyrrolidin-2-one (3e)**

$^{13}\text{C}$  NMR ( $\text{CDCl}_3$ , 150 MHz)

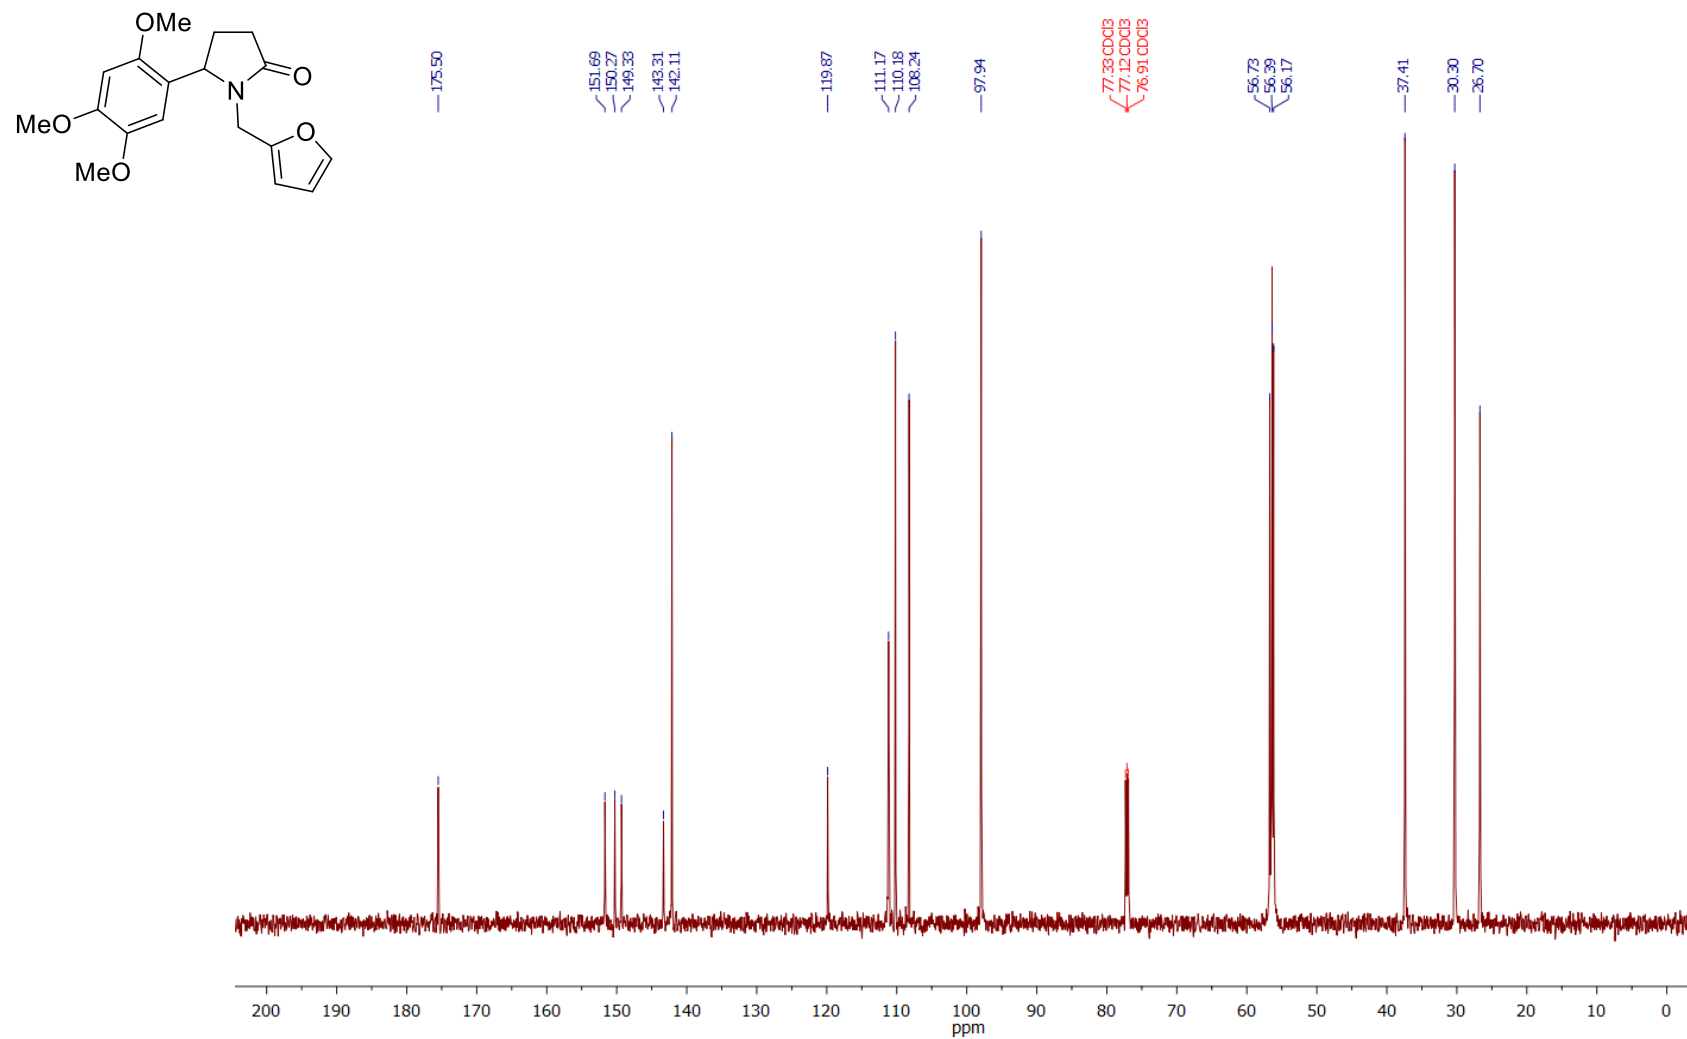

**1-Furfuryl-5-(2,4,5-trimethoxyphenyl)pyrrolidin-2-one (3e)**

HSQC  $^1\text{H}$ - $^{13}\text{C}$  ( $\text{CDCl}_3$ )

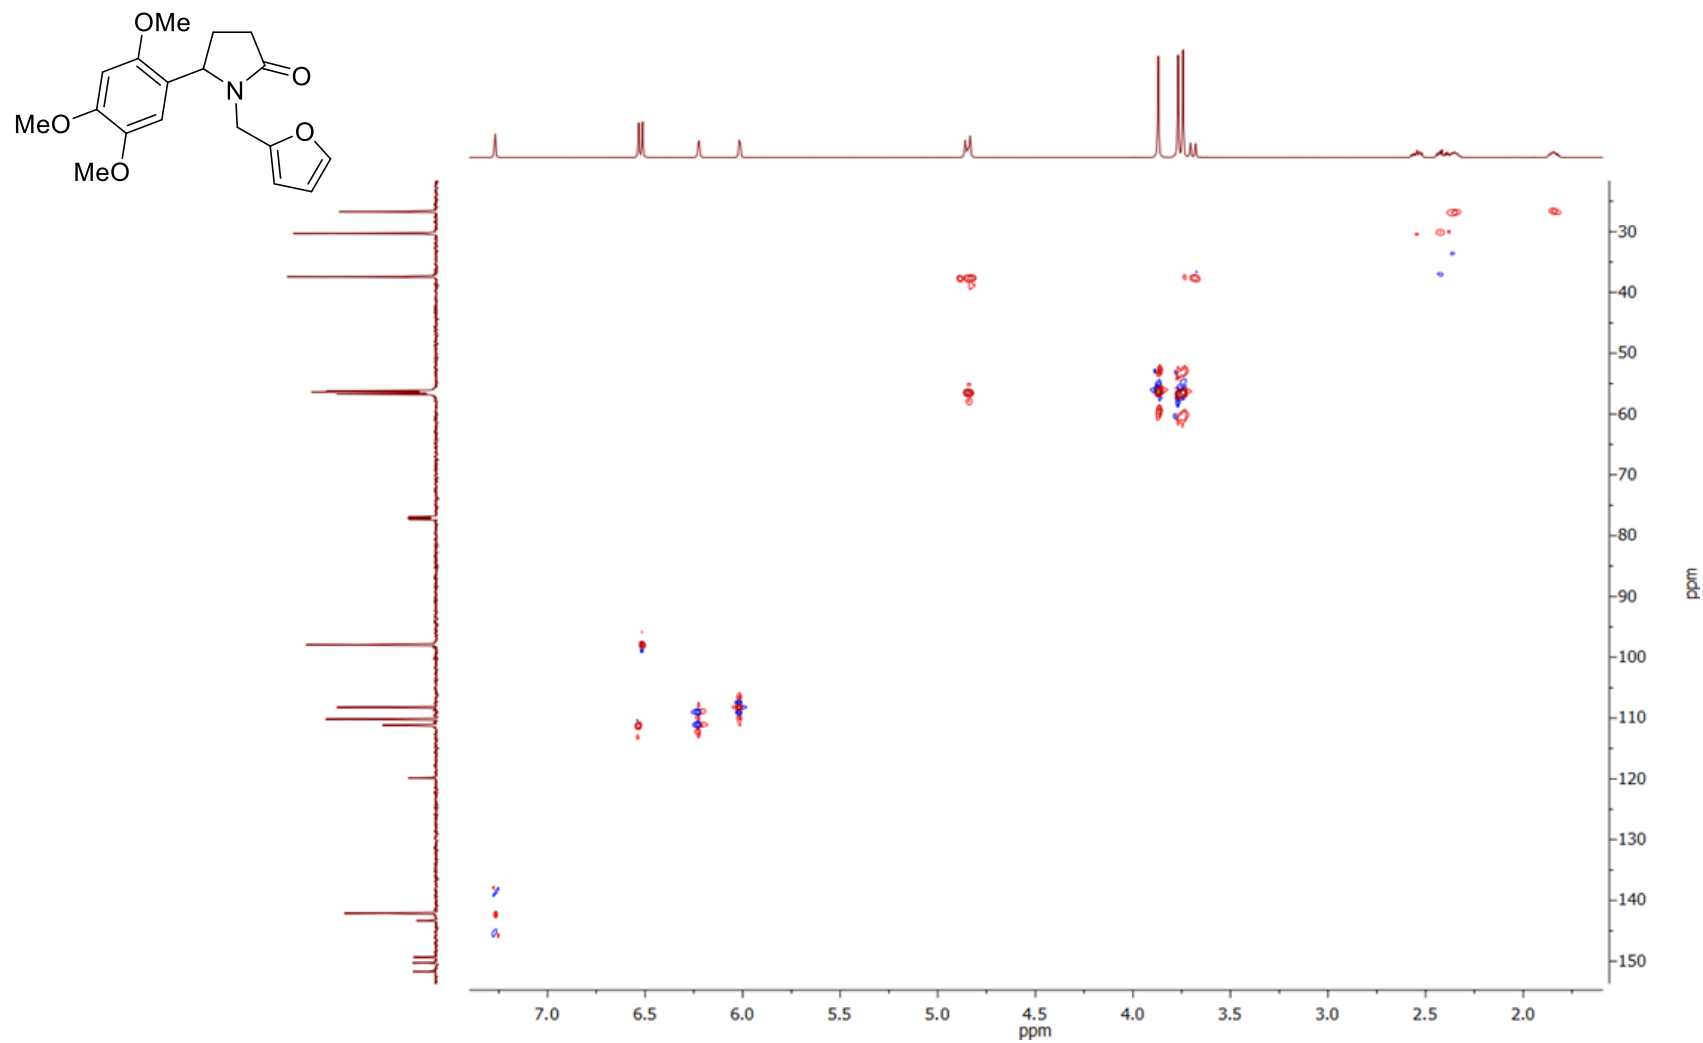



**1-Furfuryl-5-(2,4,5-trimethoxyphenyl)pyrrolidin-2-one (3e)**

HMBC  $^1\text{H}$ - $^{13}\text{C}$  ( $\text{CDCl}_3$ )

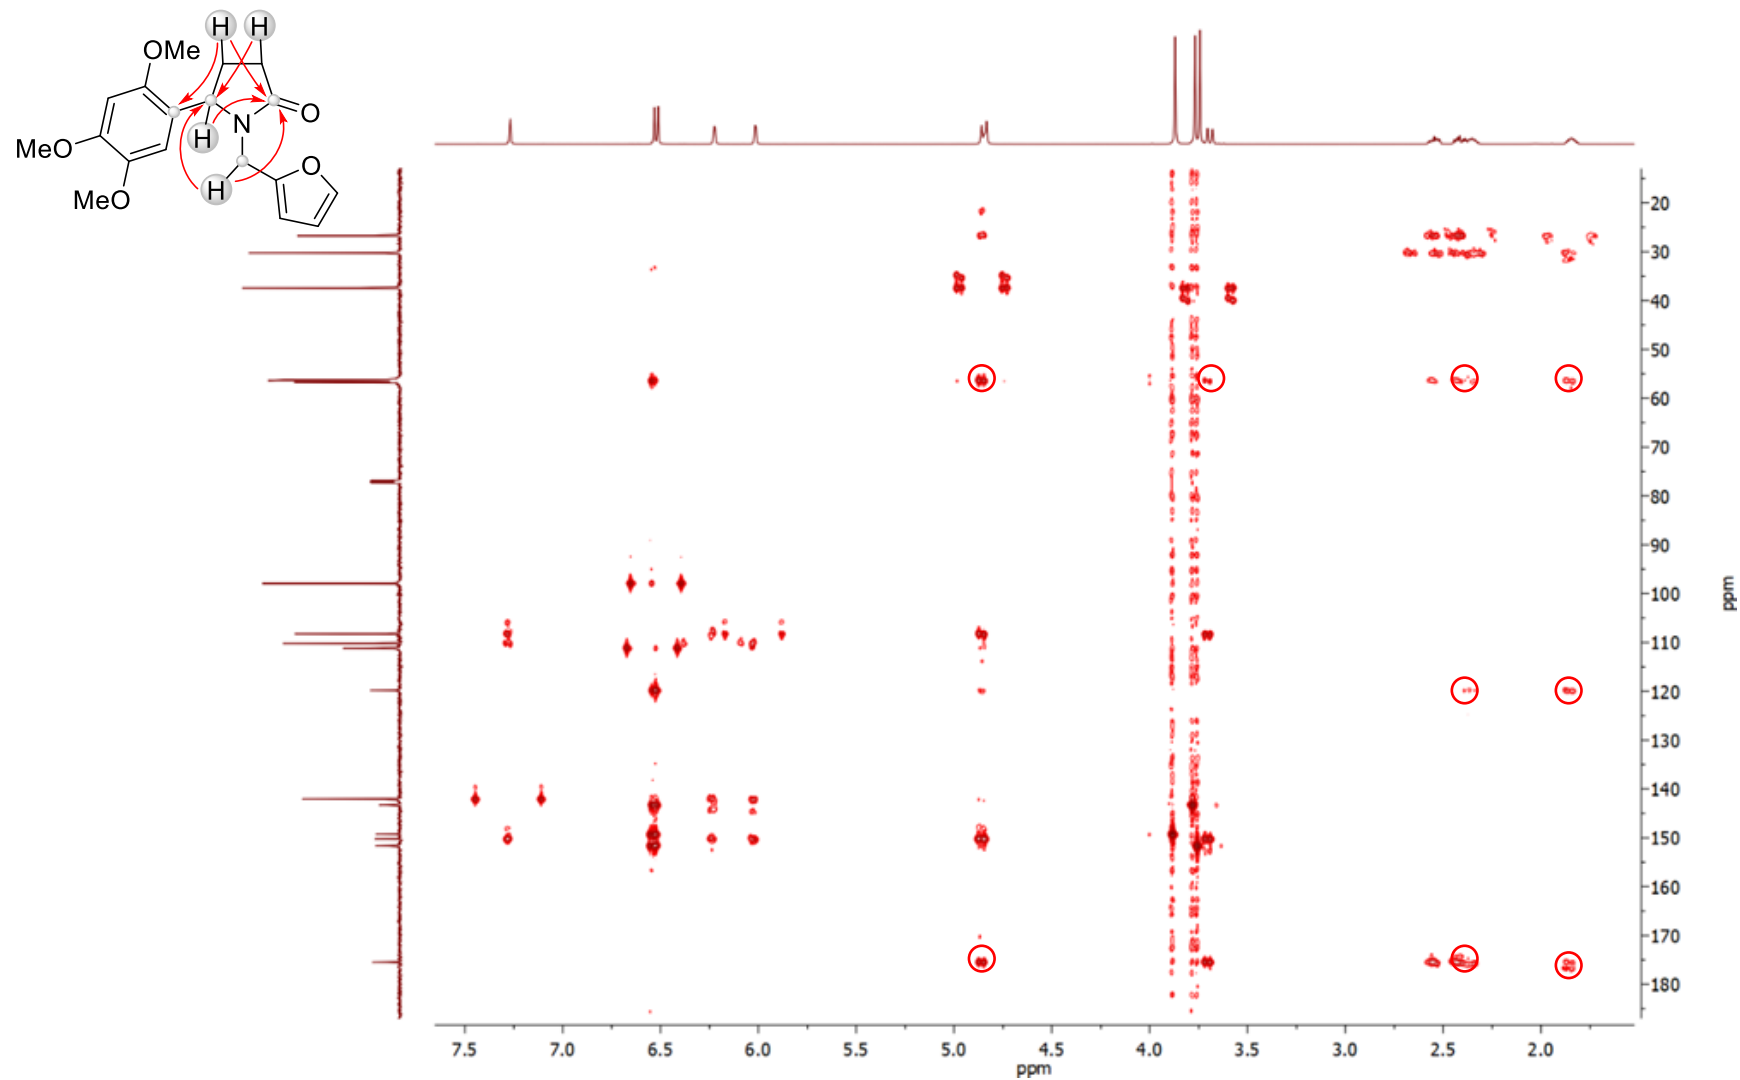

**1-[(1*H*-Indol-4-yl)methyl]-5-(3,4-dimethoxyphenyl)pyrrolidin-2-one (3f)**

<sup>1</sup>H NMR (CDCl<sub>3</sub>, 500 MHz)

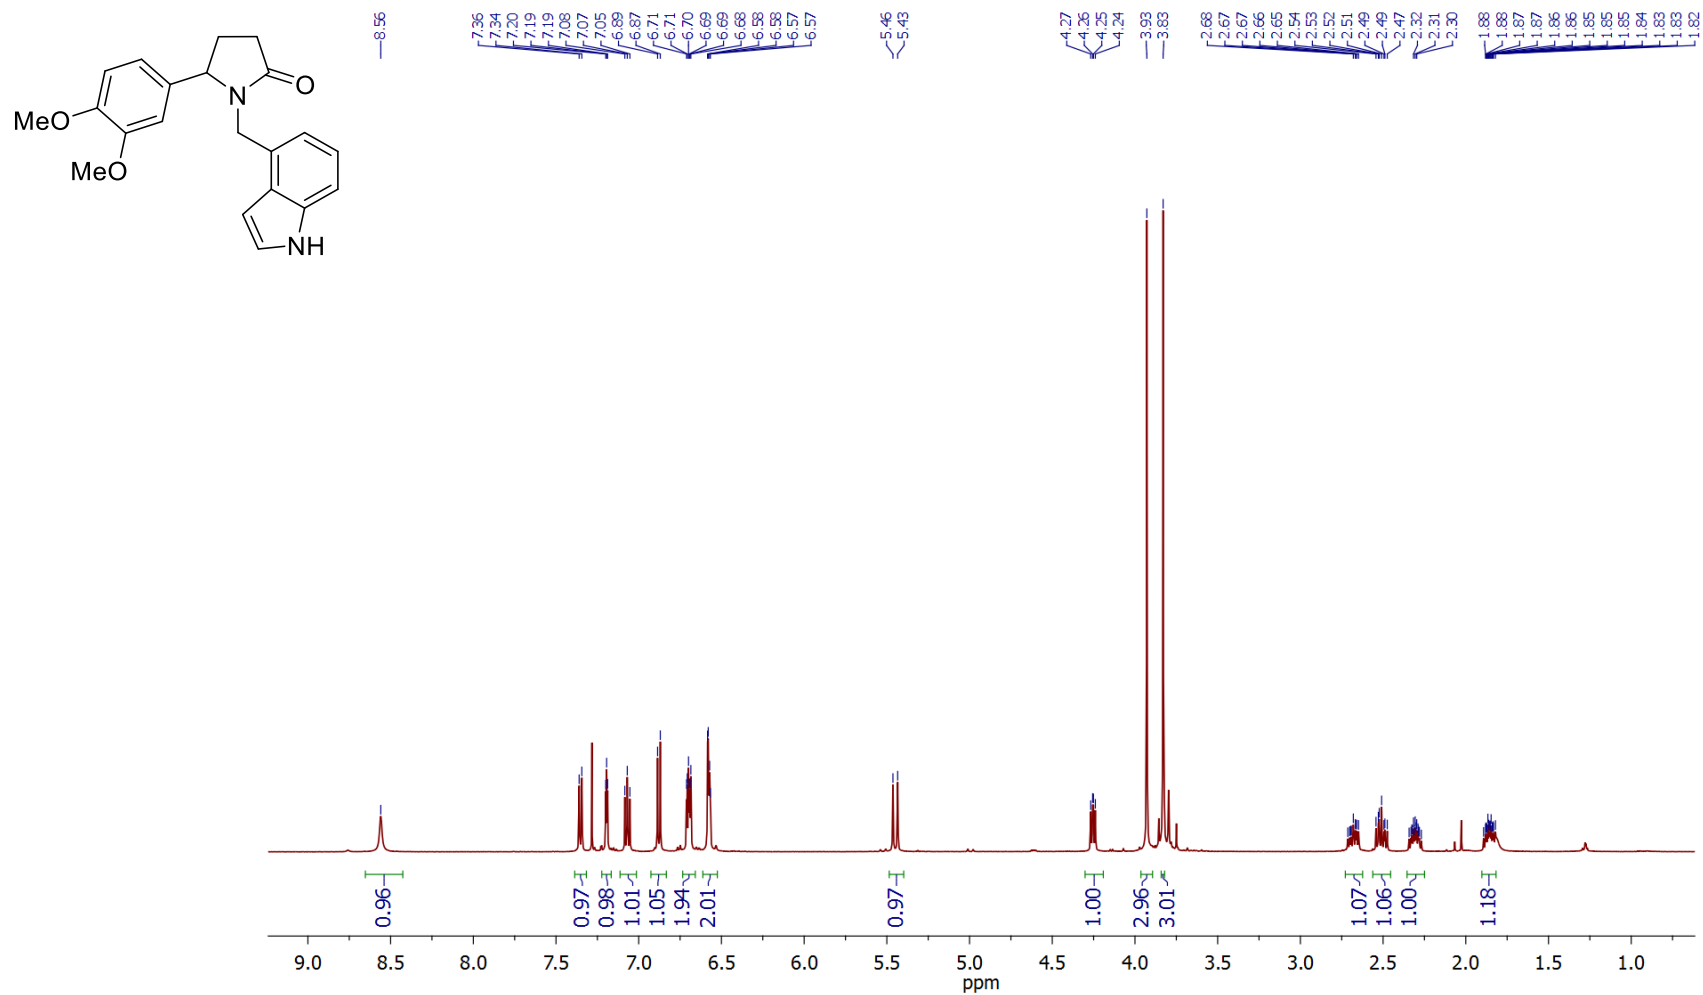

**1-[(1*H*-Indol-4-yl)methyl]-5-(3,4-dimethoxyphenyl)pyrrolidin-2-one (3f)**

<sup>13</sup>C NMR (CDCl<sub>3</sub>, 125 MHz)

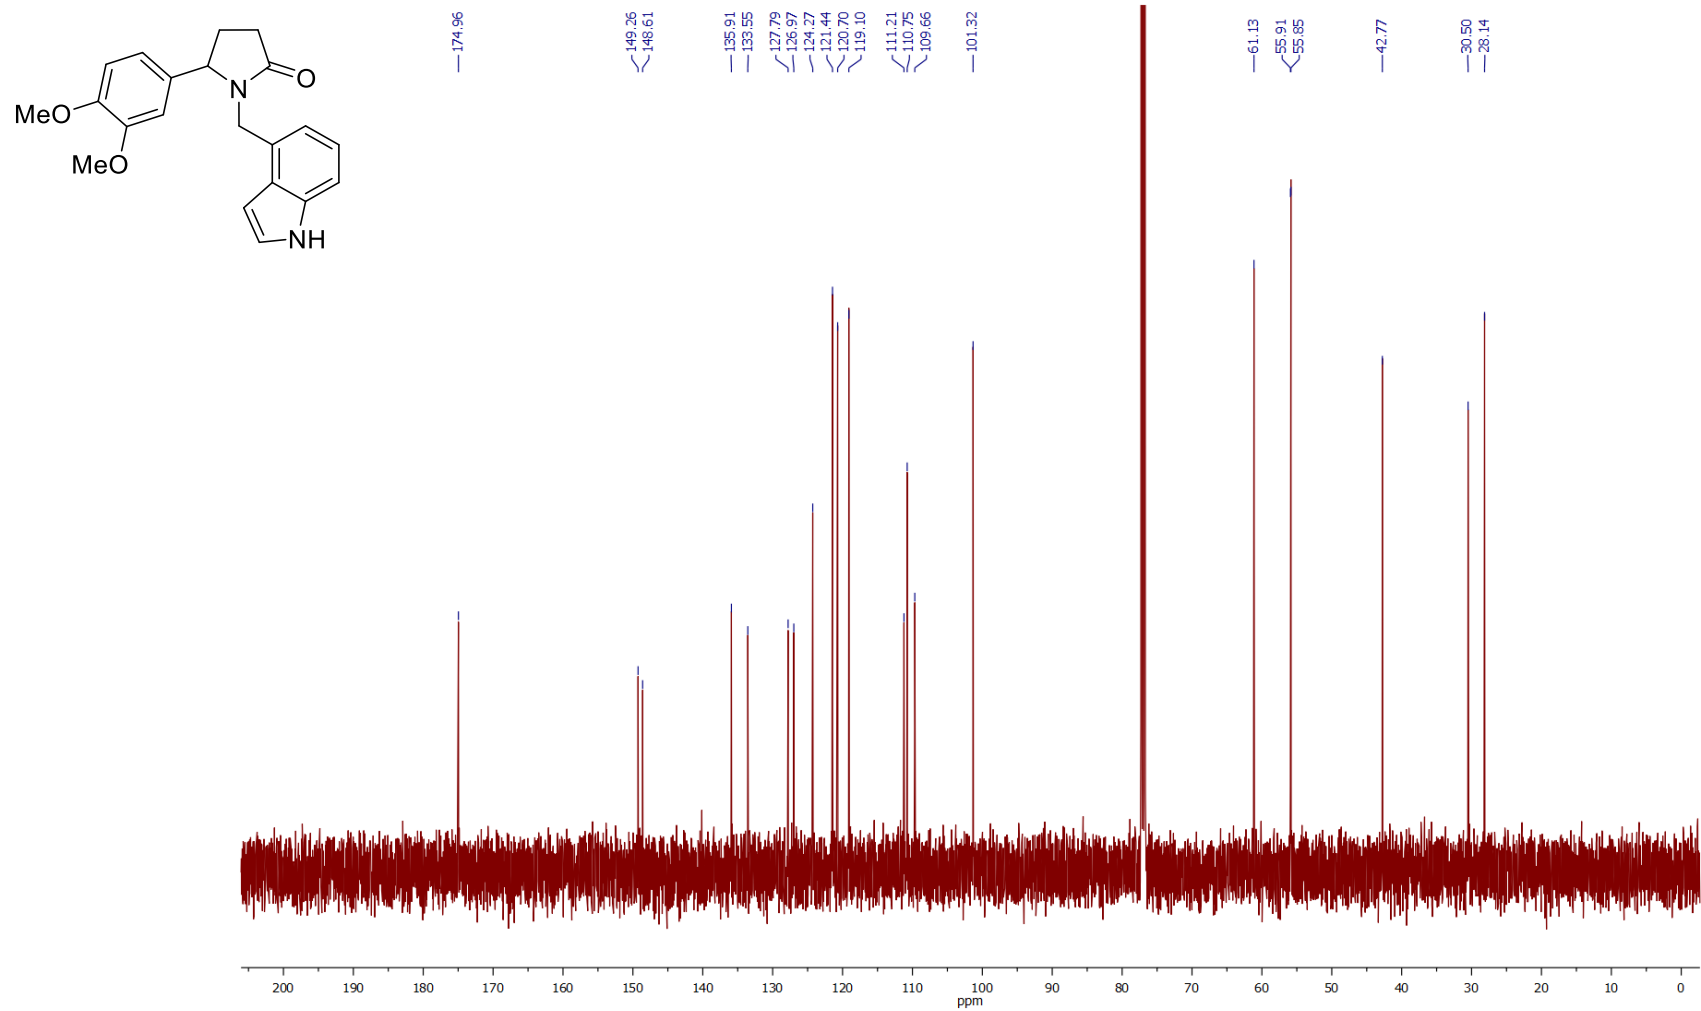

**(E)-1-[2-(1H-Indol-3-yl)ethyl]-5-styrylpyrrolidin-2-one (3g)**

<sup>1</sup>H NMR (CDCl<sub>3</sub>, 600 MHz)

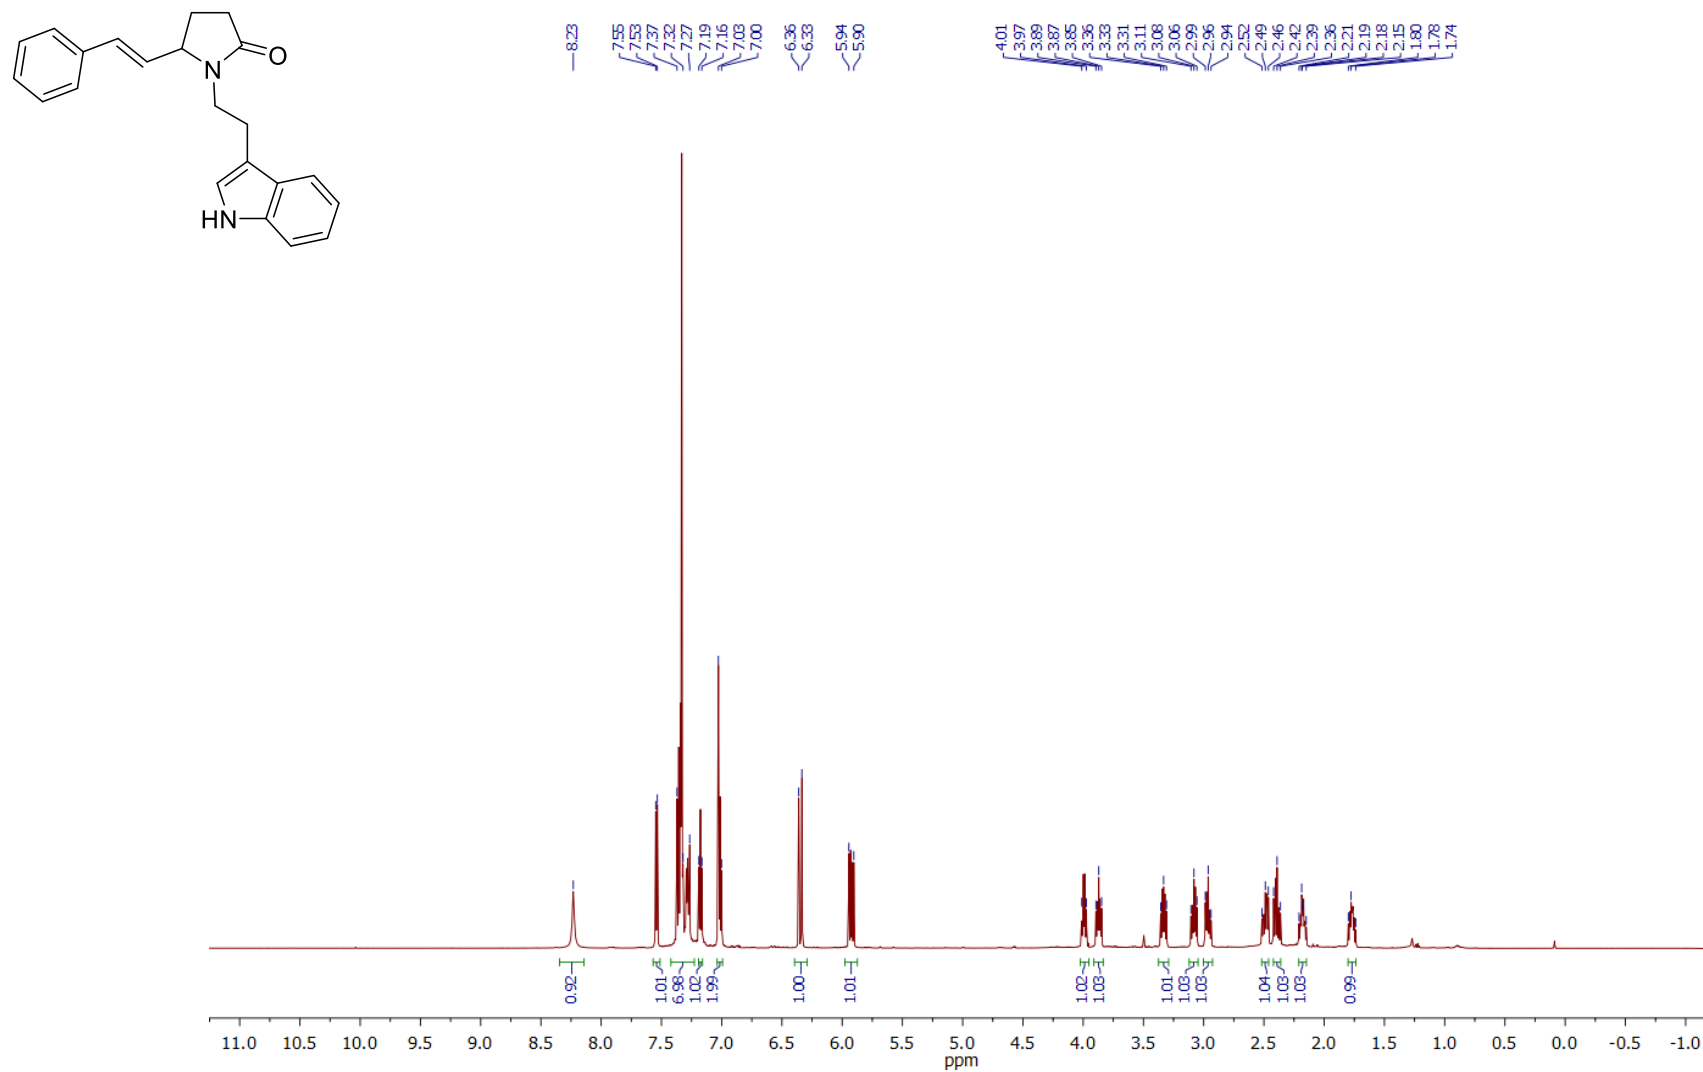

**(E)-1-[2-(1*H*-Indol-3-yl)ethyl]-5-styrylpyrrolidin-2-one (3g)**

<sup>13</sup>C NMR (CDCl<sub>3</sub>, 150 MHz)

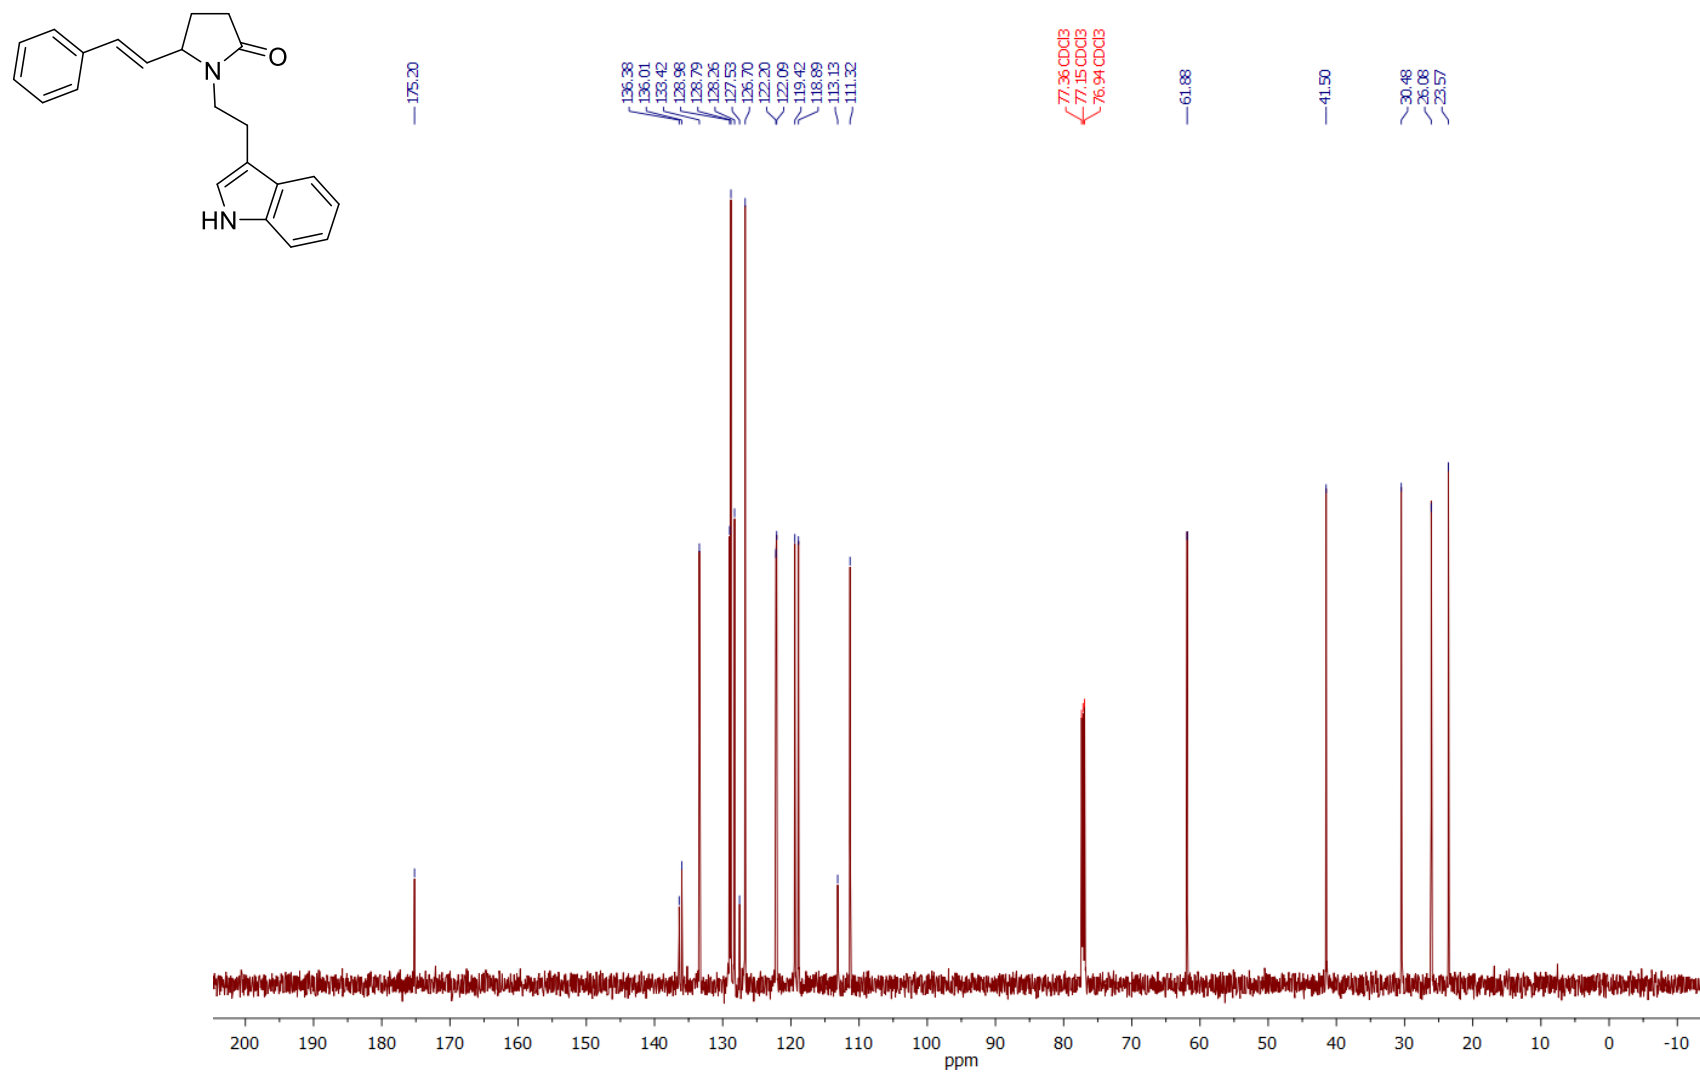

**(E)-1-[2-(1*H*-Indol-3-yl)ethyl]-5-styrylpyrrolidin-2-one (3g)**

HSQC  $^1\text{H}$ - $^{13}\text{C}$  ( $\text{CDCl}_3$ )

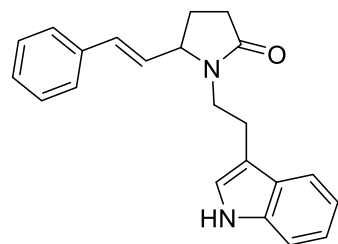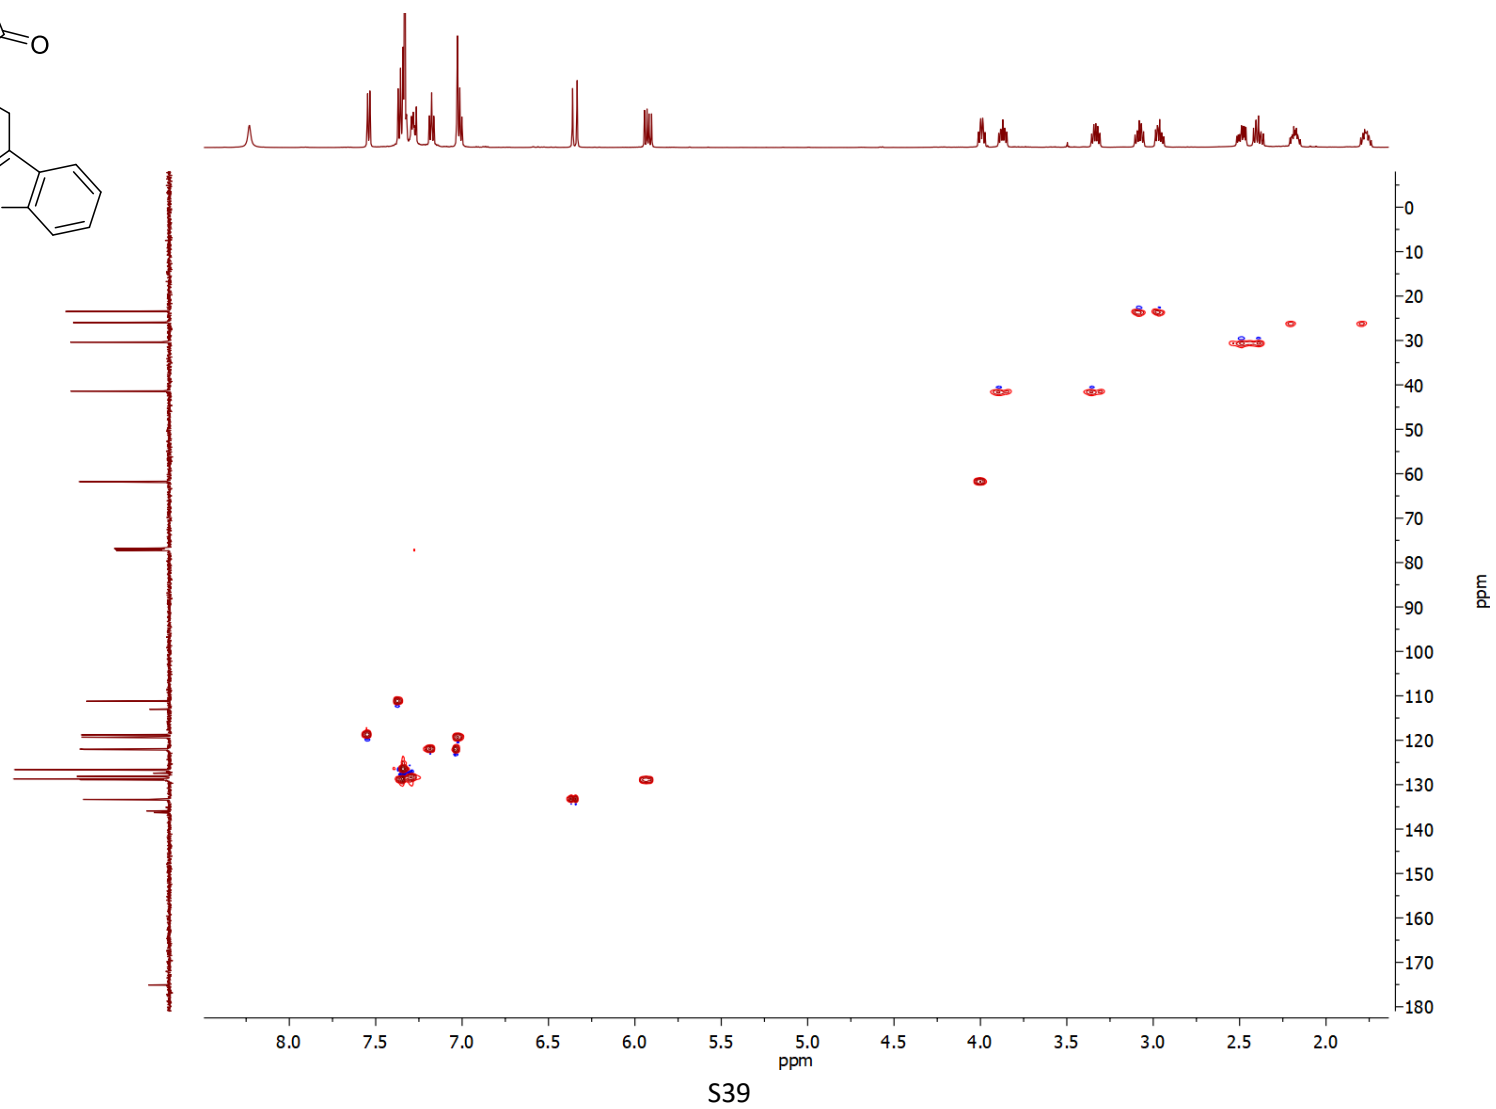

**(*E*)-1-[2-(1*H*-Indol-3-yl)ethyl]-5-styrylpyrrolidin-2-one (3g)**

HMBC  $^1\text{H}$ - $^{13}\text{C}$  ( $\text{CDCl}_3$ )

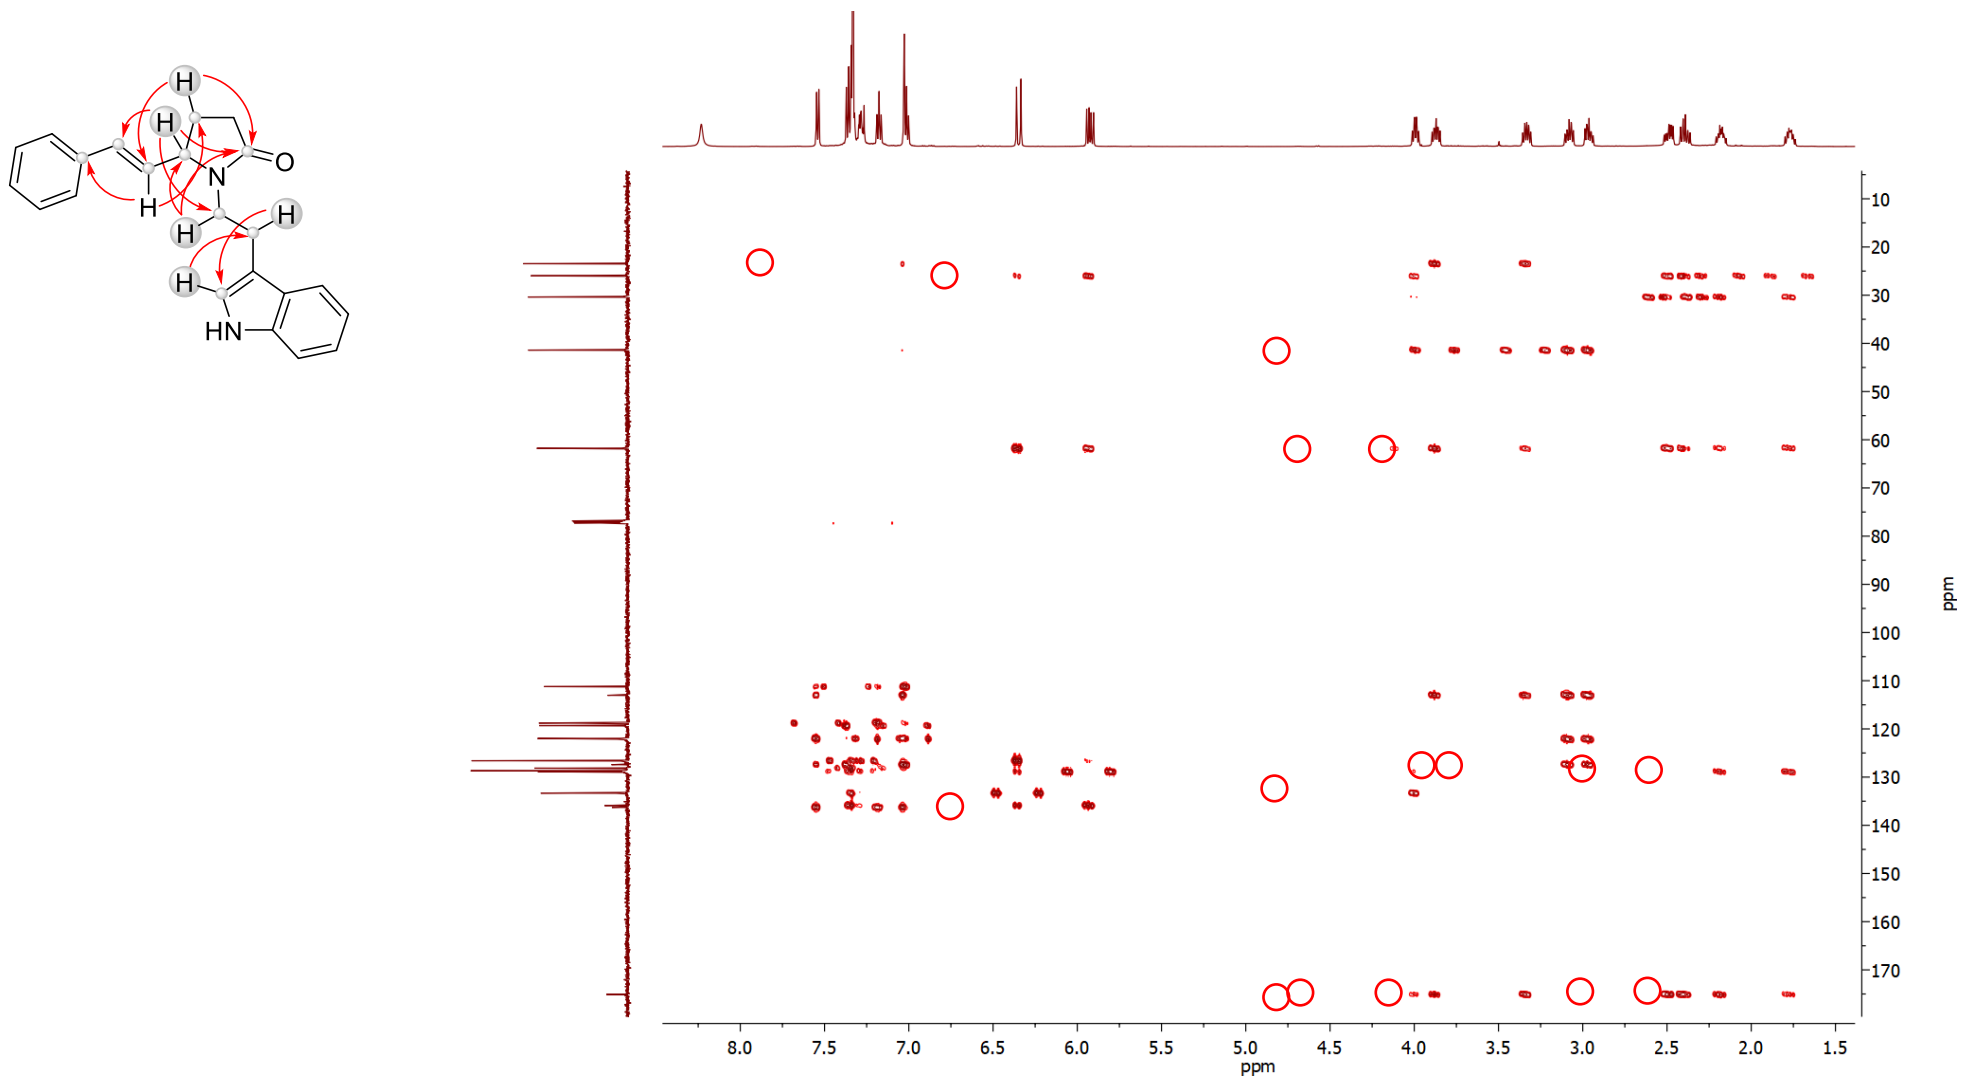

**1-Cyclobutyl-5-(4-morpholinophenyl)pyrrolidin-2-one (3h)**

$^1\text{H}$  NMR ( $\text{CDCl}_3$ , 500 MHz)

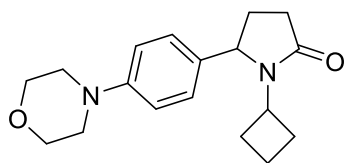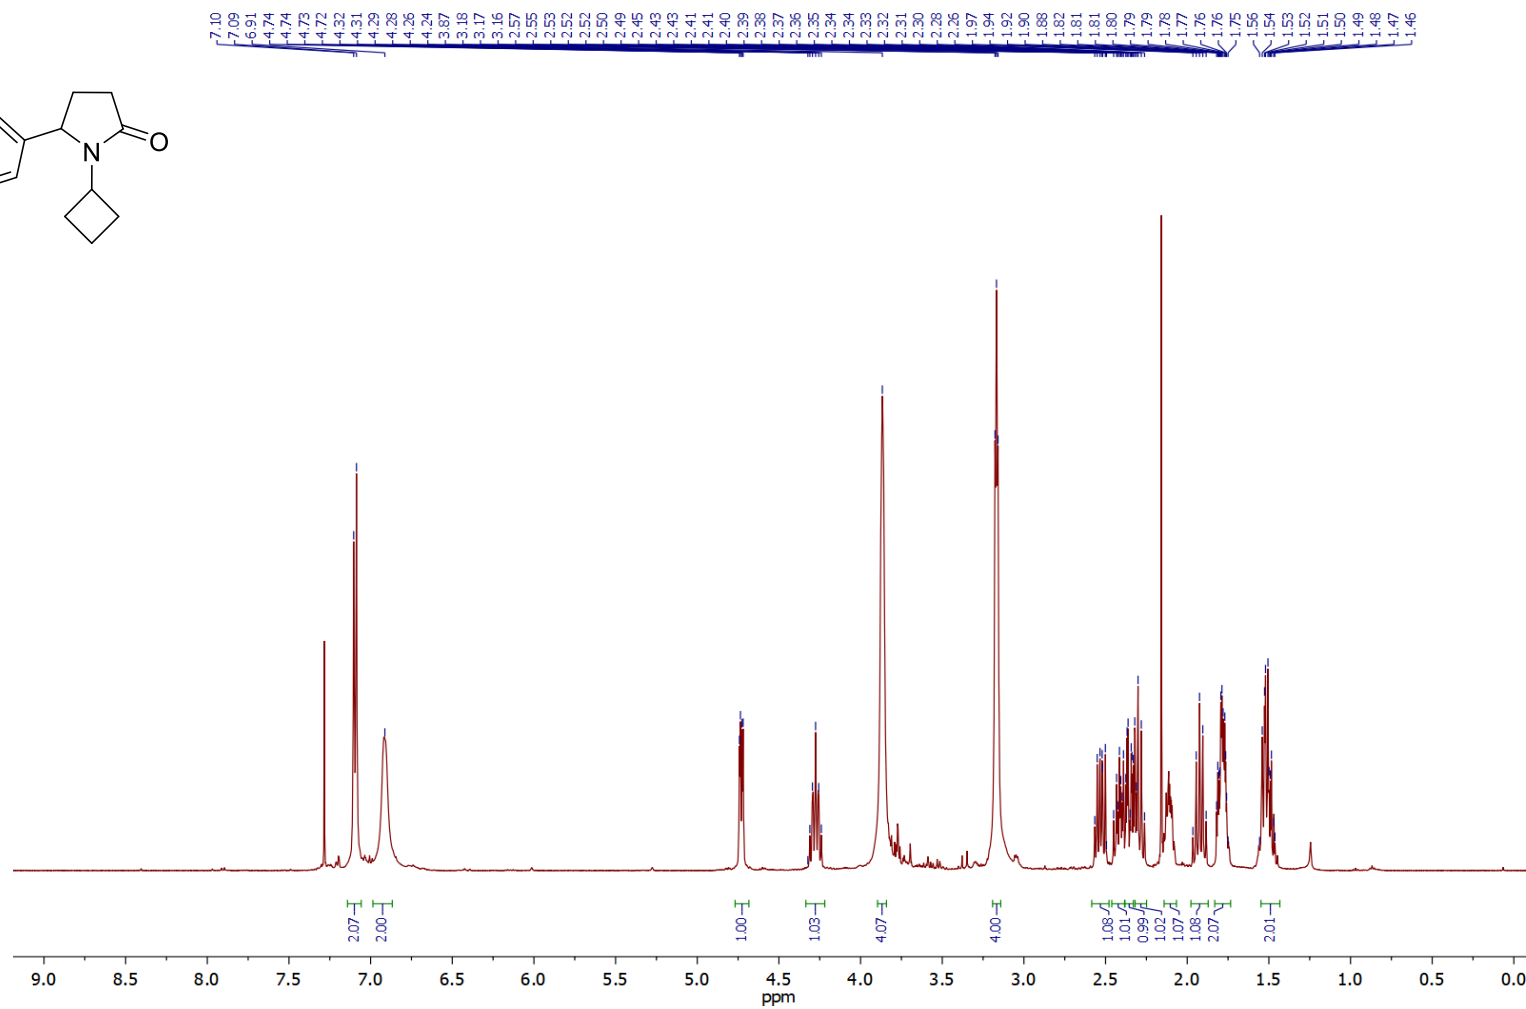



**1-Cyclobutyl-5-(4-morpholinophenyl)pyrrolidin-2-one (3h)**

$^{13}\text{C}$  NMR ( $\text{CDCl}_3$ , 125 MHz)

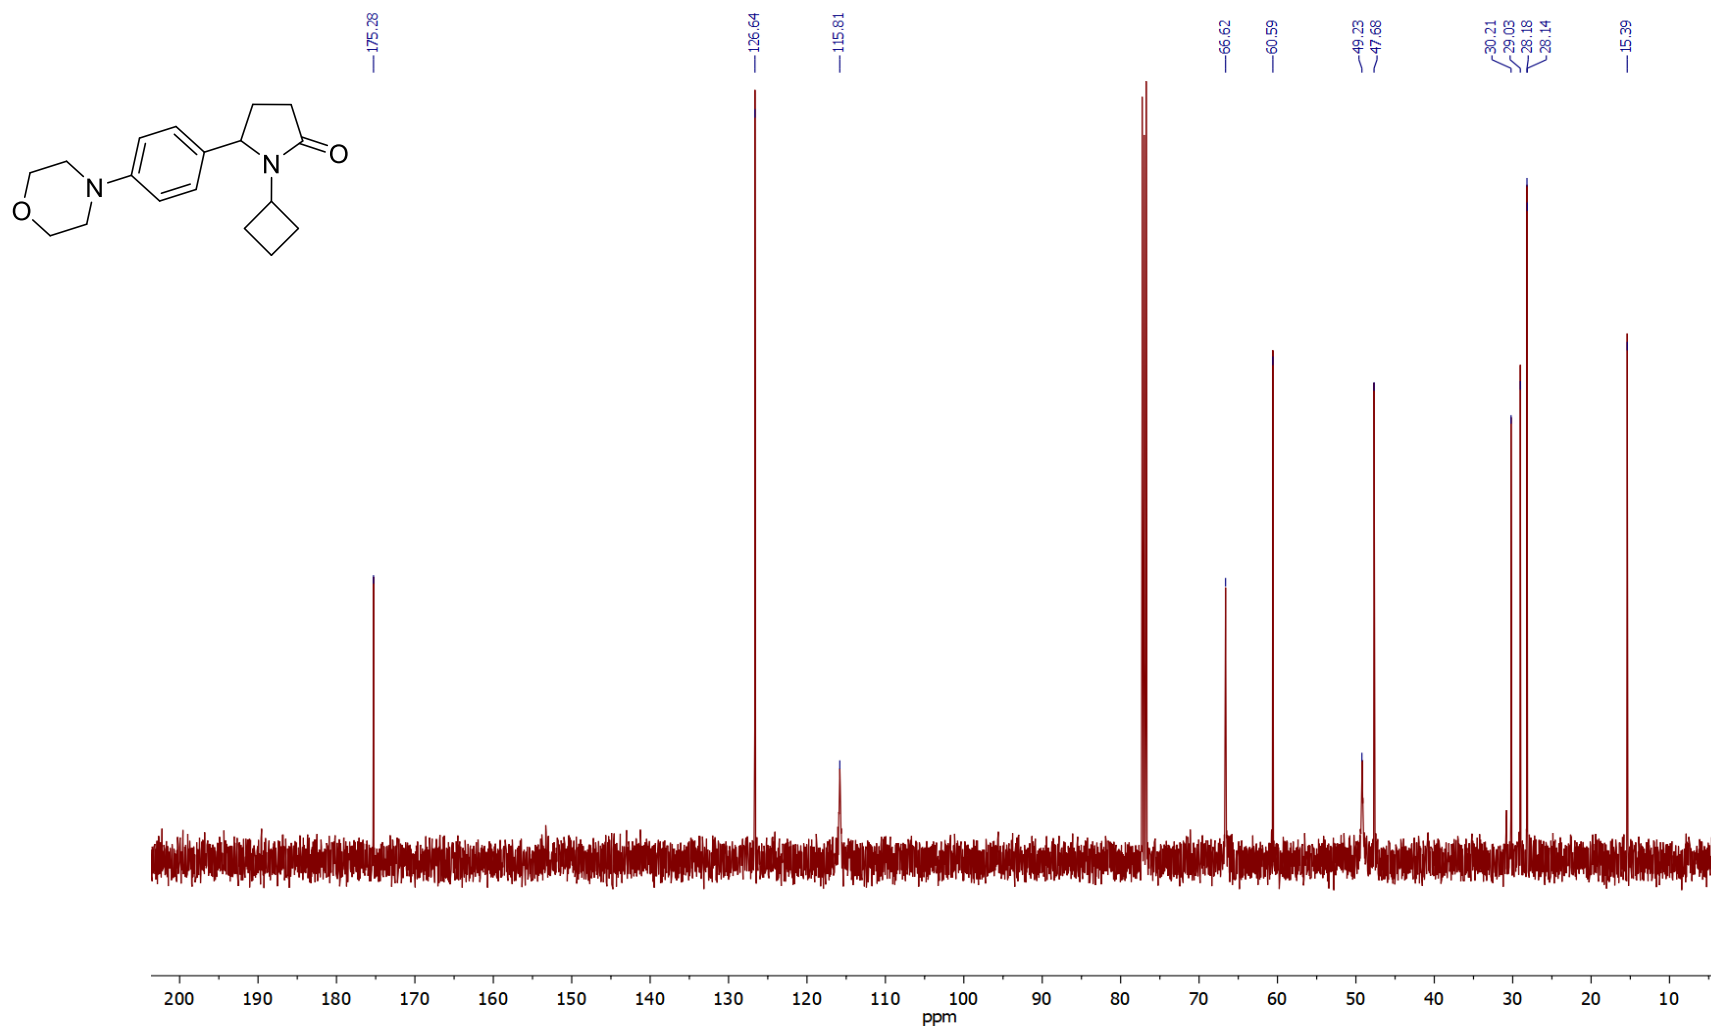

**1-Cyclobutyl-5-(4-morpholinophenyl)pyrrolidin-2-one (3h)**

HSQC  $^1\text{H}$ - $^{13}\text{C}$  ( $\text{CDCl}_3$ )

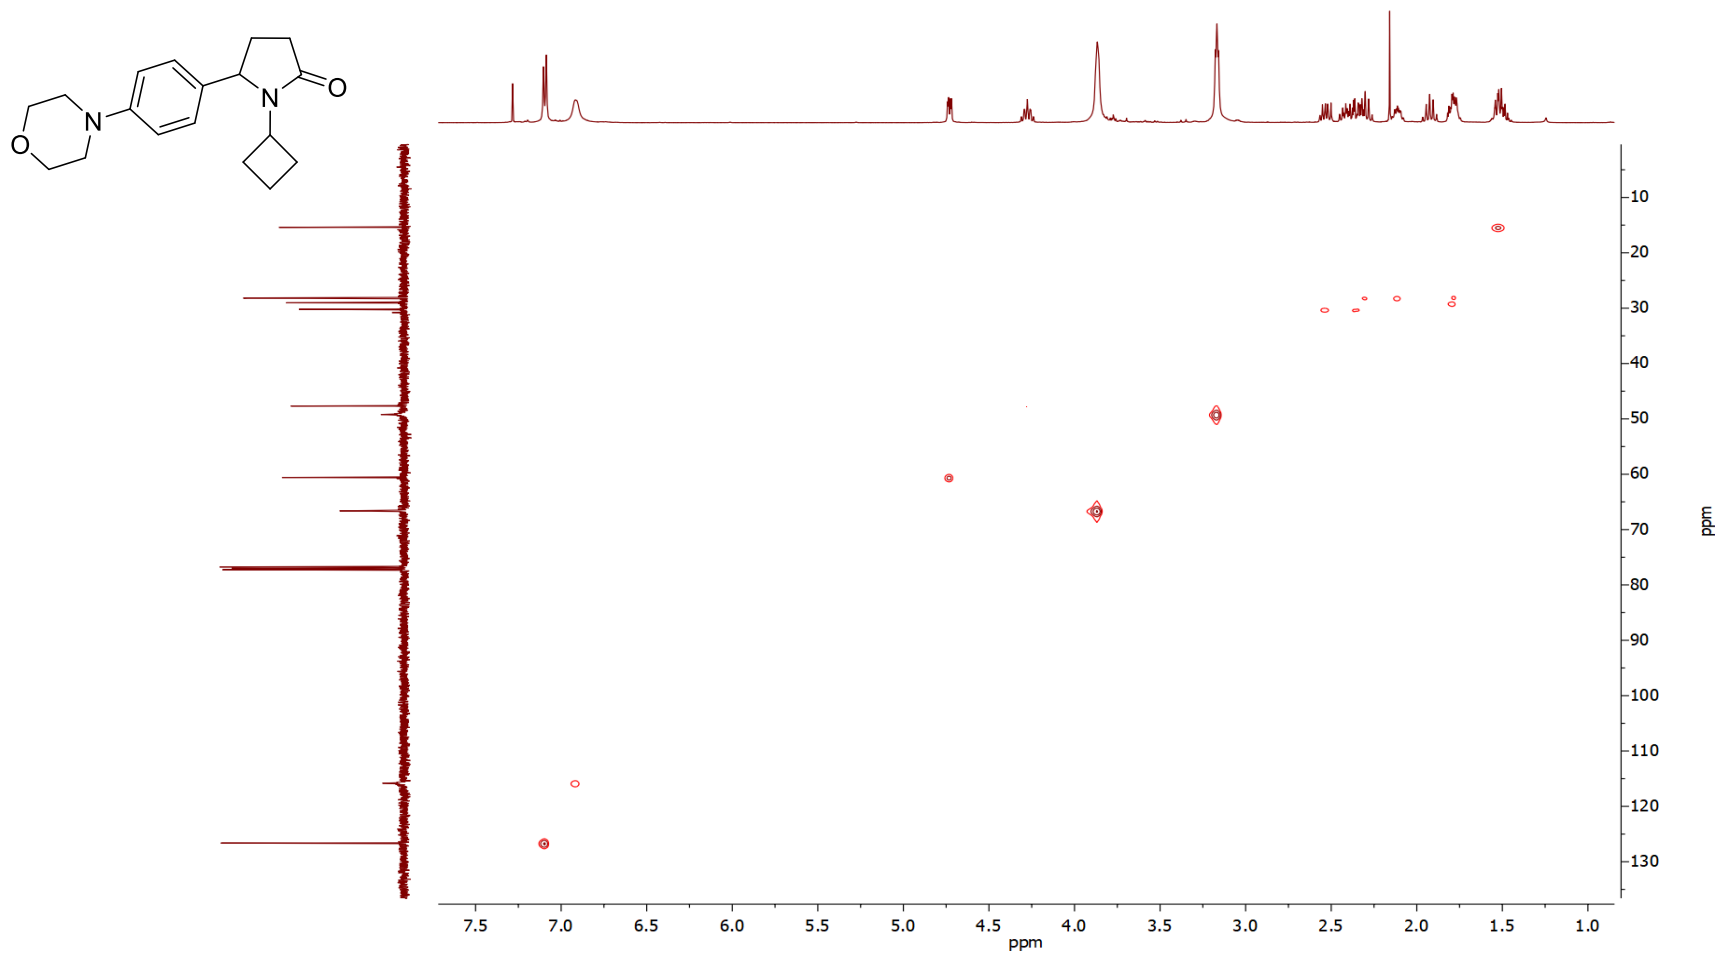

**5-(3,4-Dimethoxyphenyl)-1-(prop-2-yn-1-yl)pyrrolidin-2-one (3i)**

$^1\text{H}$  NMR ( $\text{CDCl}_3$ , 400 MHz)

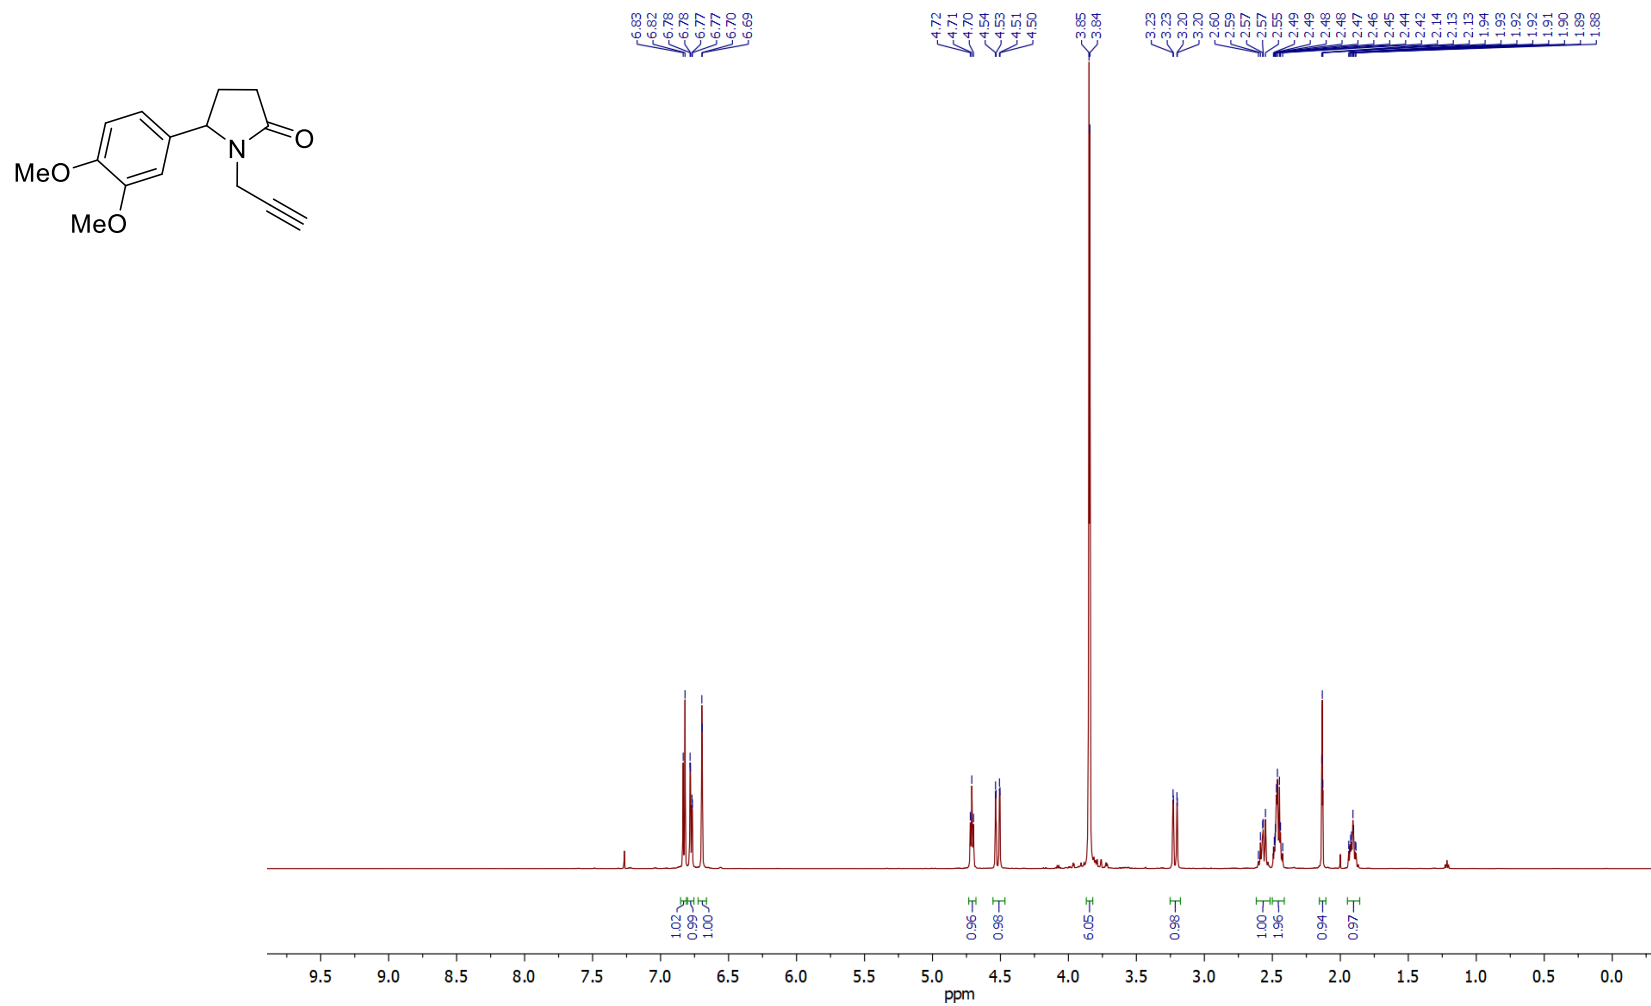

**5-(3,4-Dimethoxyphenyl)-1-(prop-2-yn-1-yl)pyrrolidin-2-one (3i)**

$^{13}\text{C}$  NMR ( $\text{CDCl}_3$ , 100 MHz)

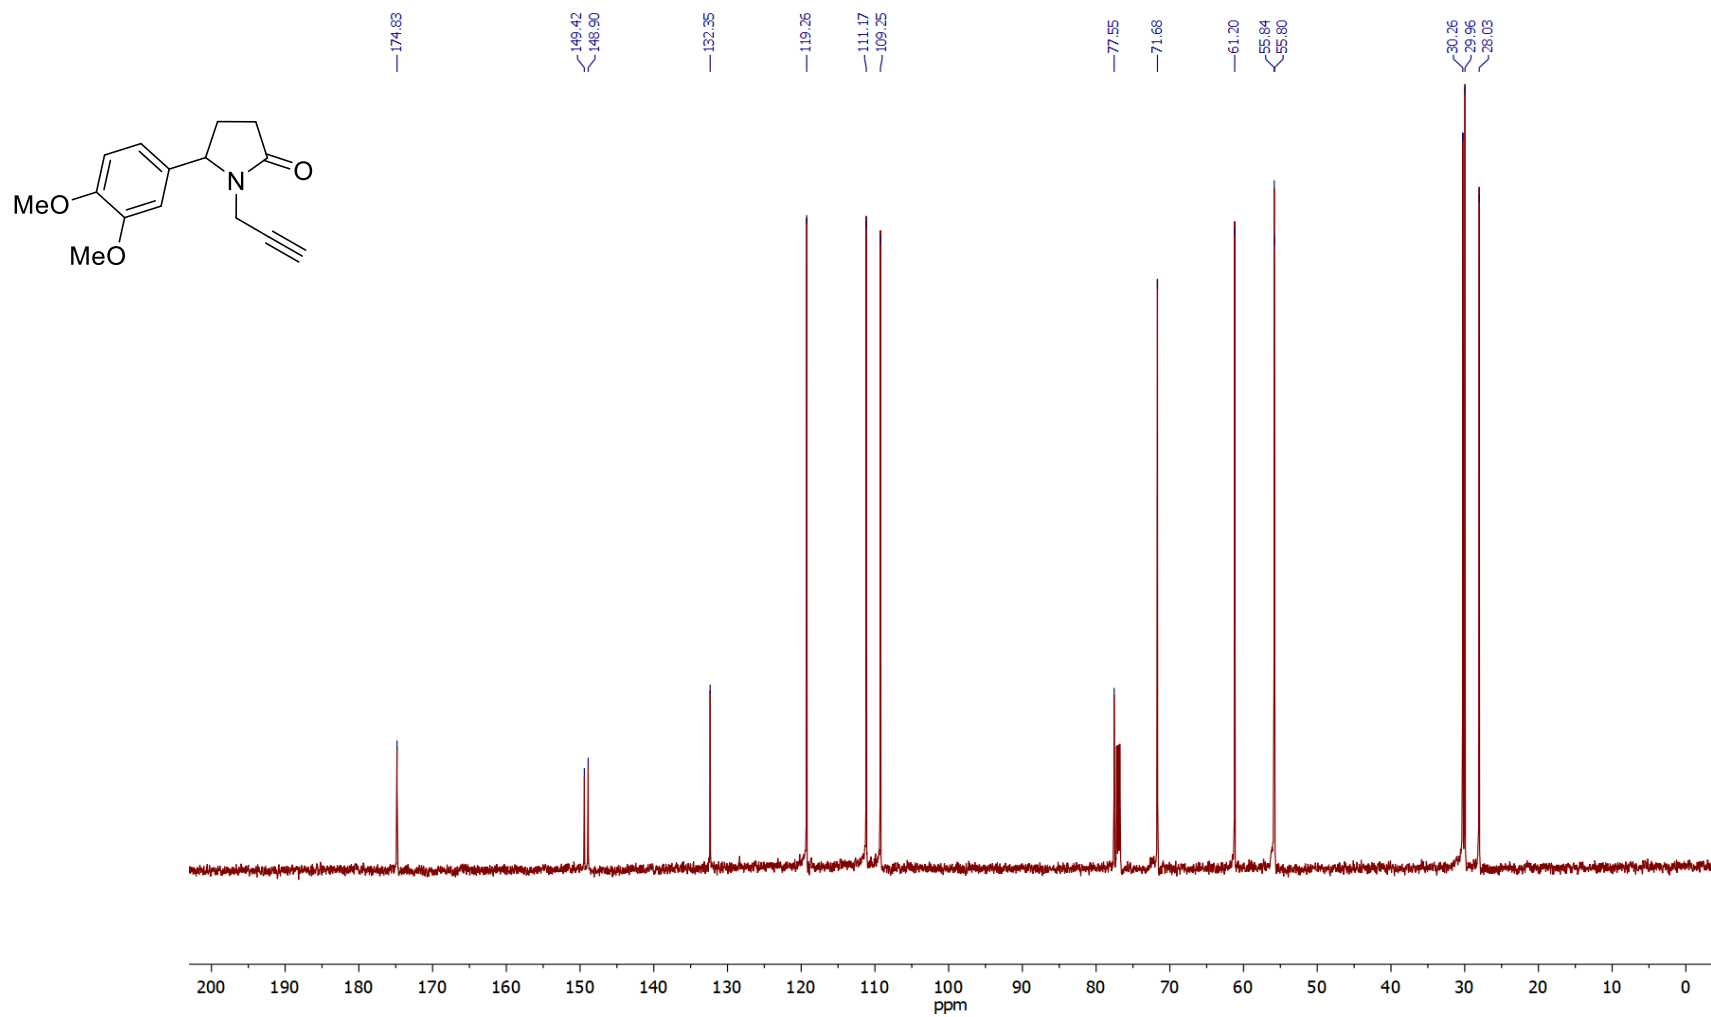

**Dimethyl 2-[2-(3,5-dimethoxyphenyl)-2-(phenylamino)ethyl]malonate (4a)**

$^1\text{H}$  NMR ( $\text{CDCl}_3$ , 600 MHz)

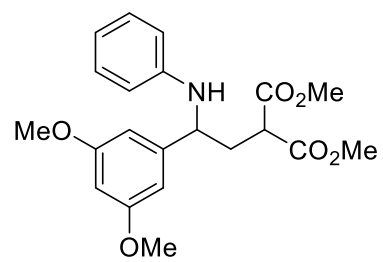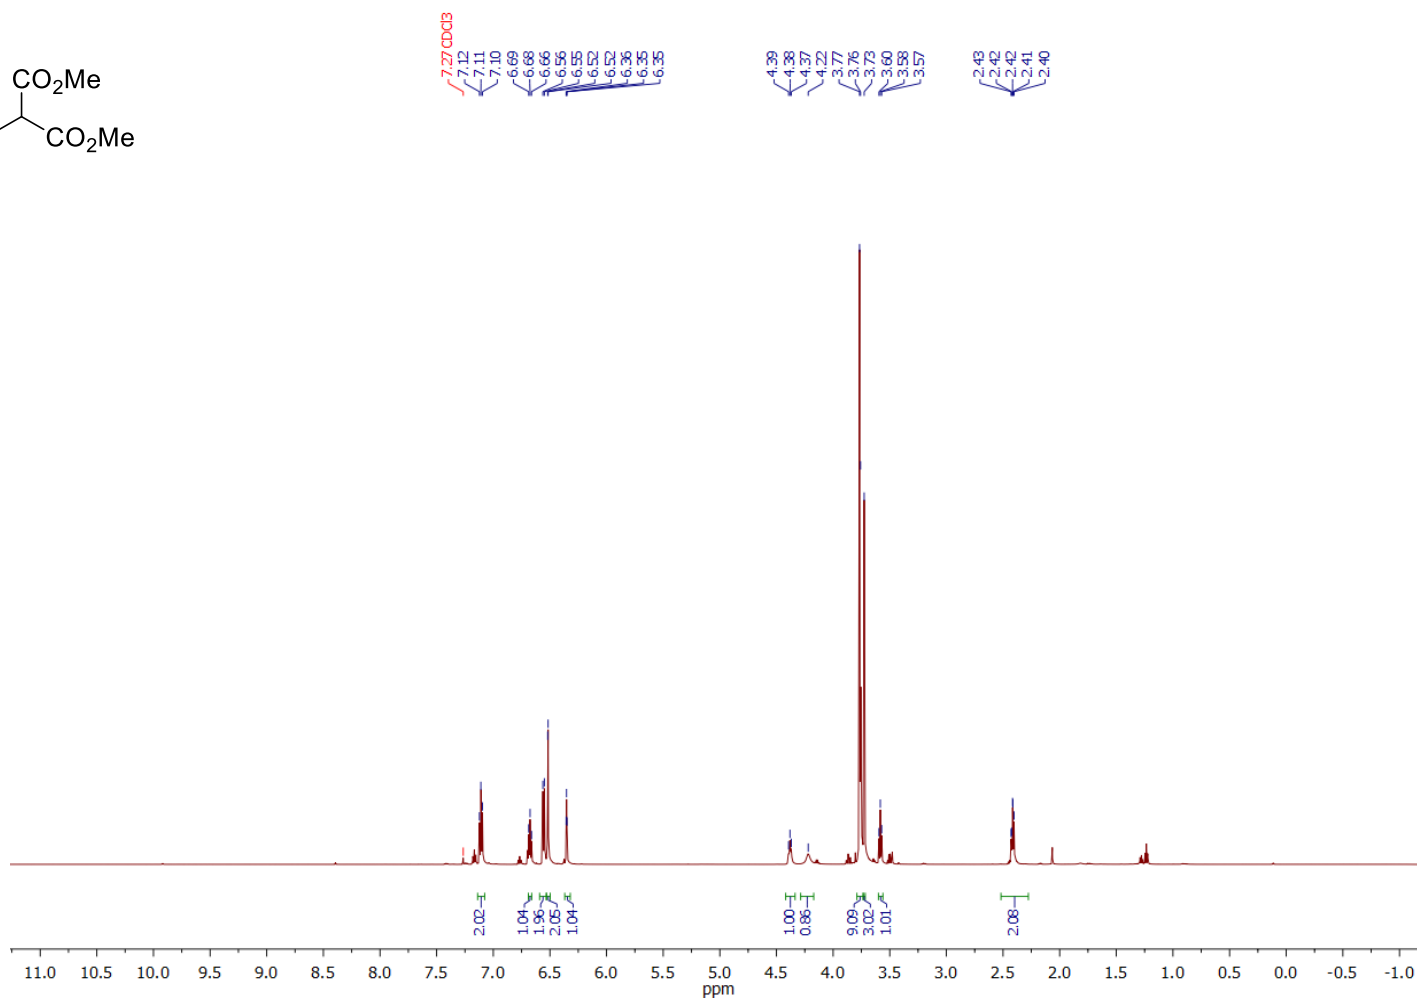

**Dimethyl 2-[2-(3,5-dimethoxyphenyl)-2-(phenylamino)ethyl]malonate (4a)**

$^{13}\text{C}$  NMR ( $\text{CDCl}_3$ , 150 MHz)

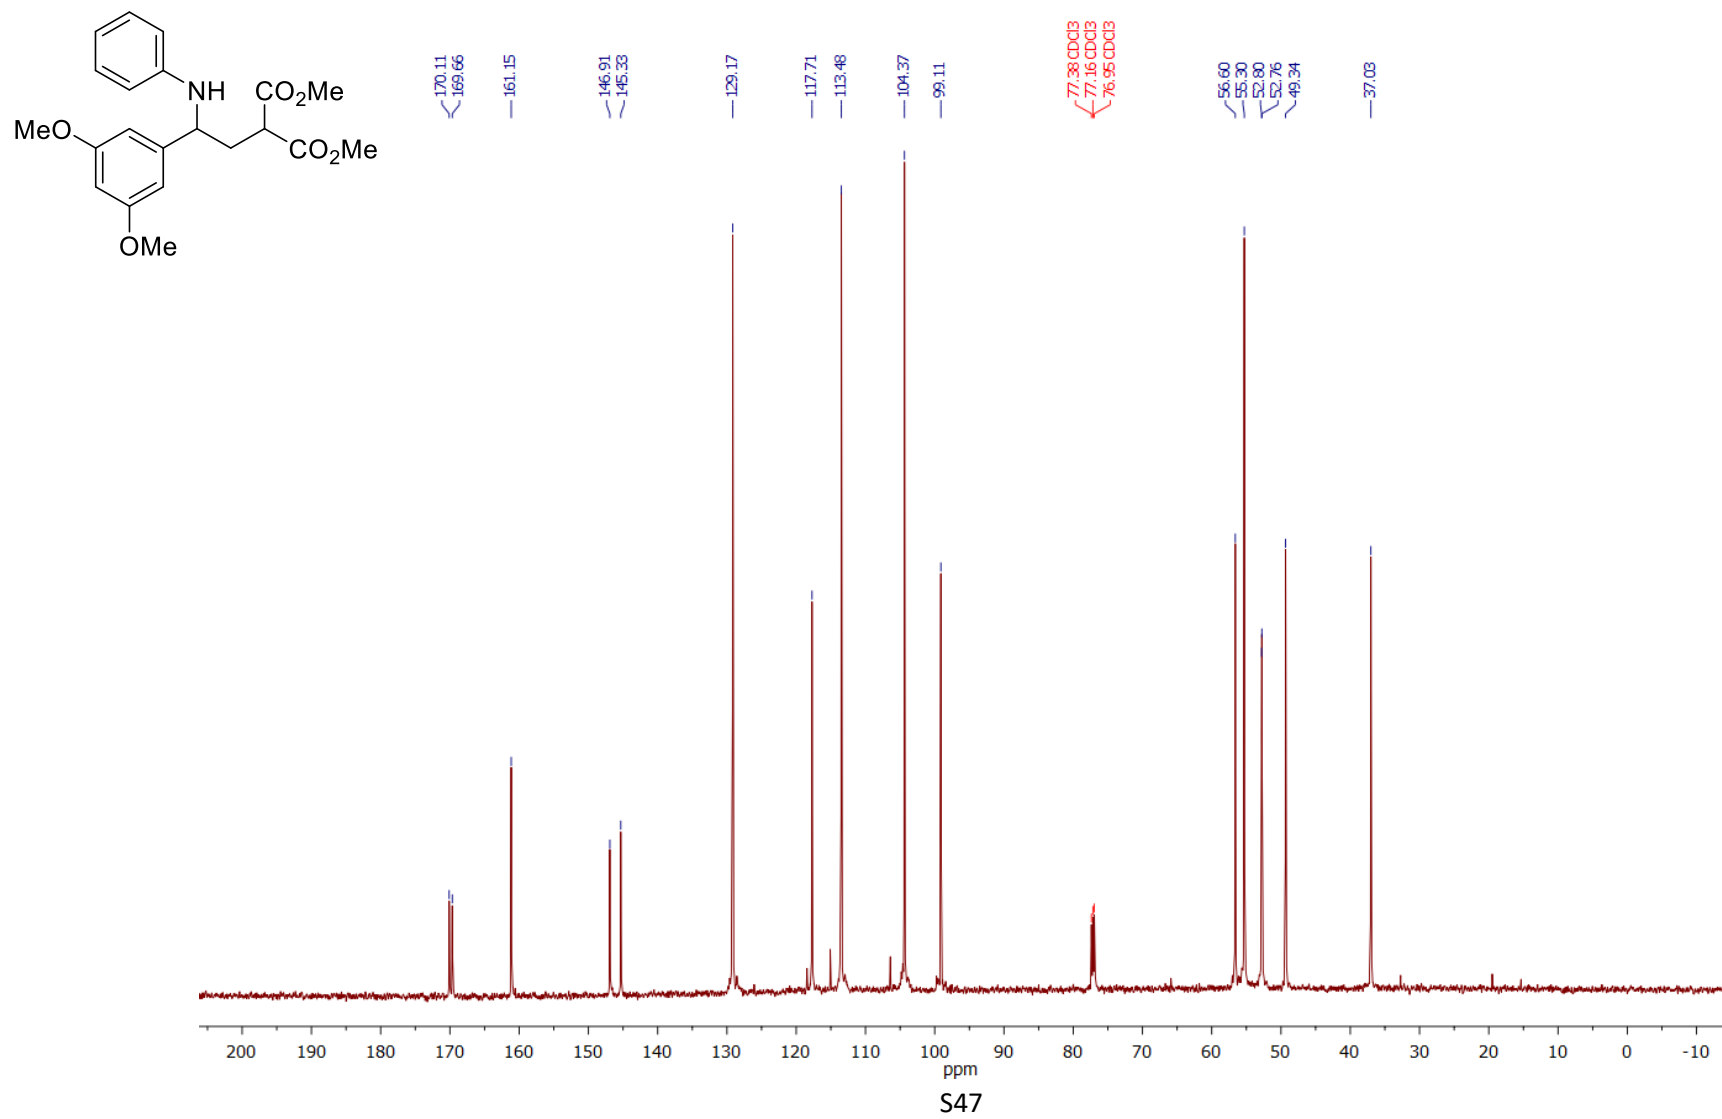

**Dimethyl 2-{2-[(2-nitrophenyl)amino]-2-phenylethyl}malonate (4b)**

$^1\text{H}$  NMR ( $\text{CDCl}_3$ , 600 MHz)

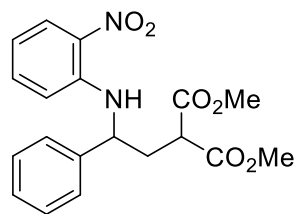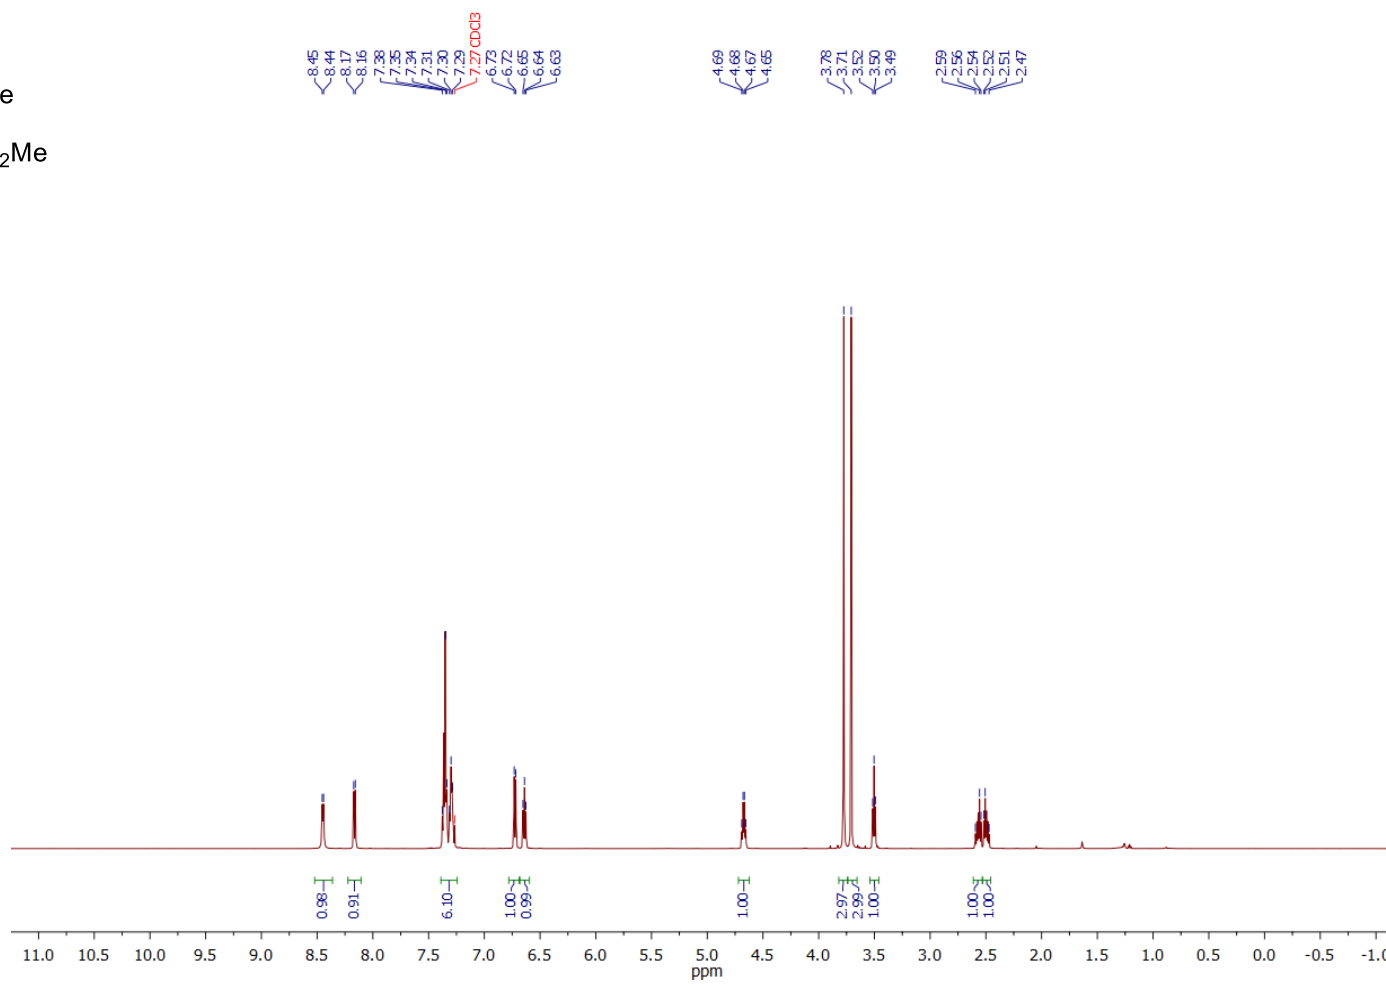

**Dimethyl 2-{2-[(2-nitrophenyl)amino]-2-phenylethyl}malonate (4b)**

$^{13}\text{C}$  NMR ( $\text{CDCl}_3$ , 150 MHz)

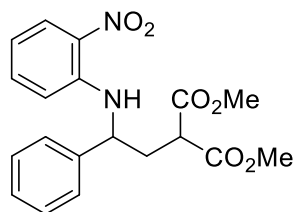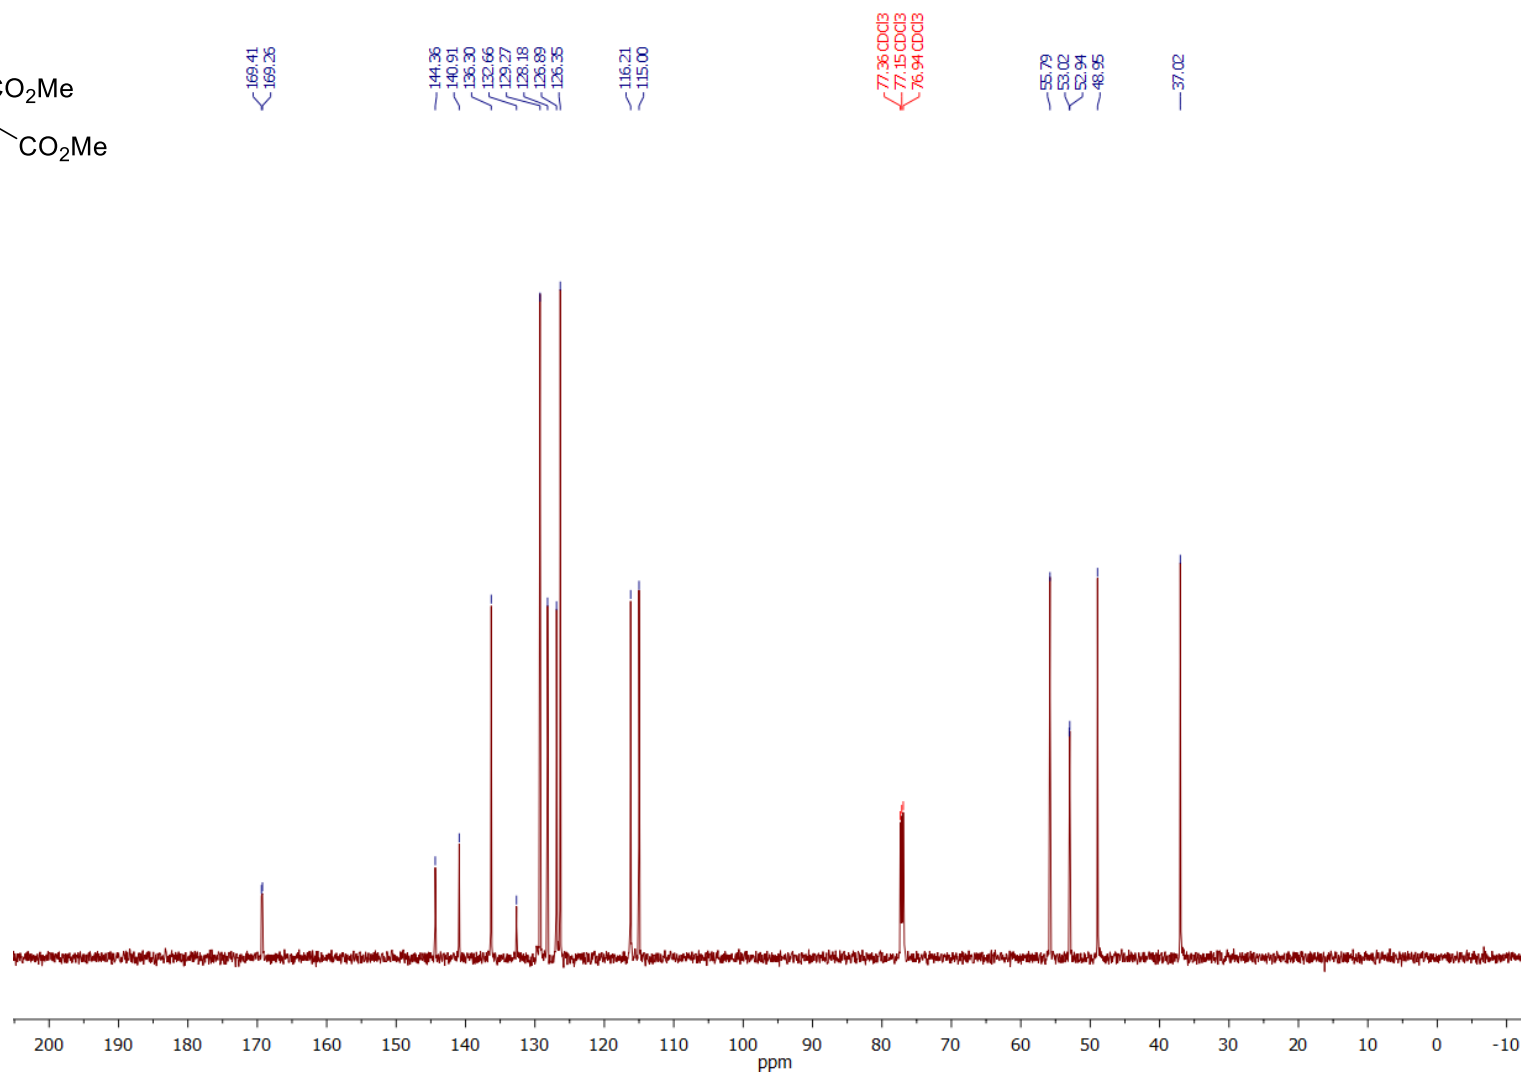



**Dimethyl 2-{2-[(2-aminophenyl)amino]-2-(3,4-dimethoxyphenyl)ethyl}malonate (4c)**

$^1\text{H}$  NMR ( $\text{CDCl}_3$ , 400 MHz)

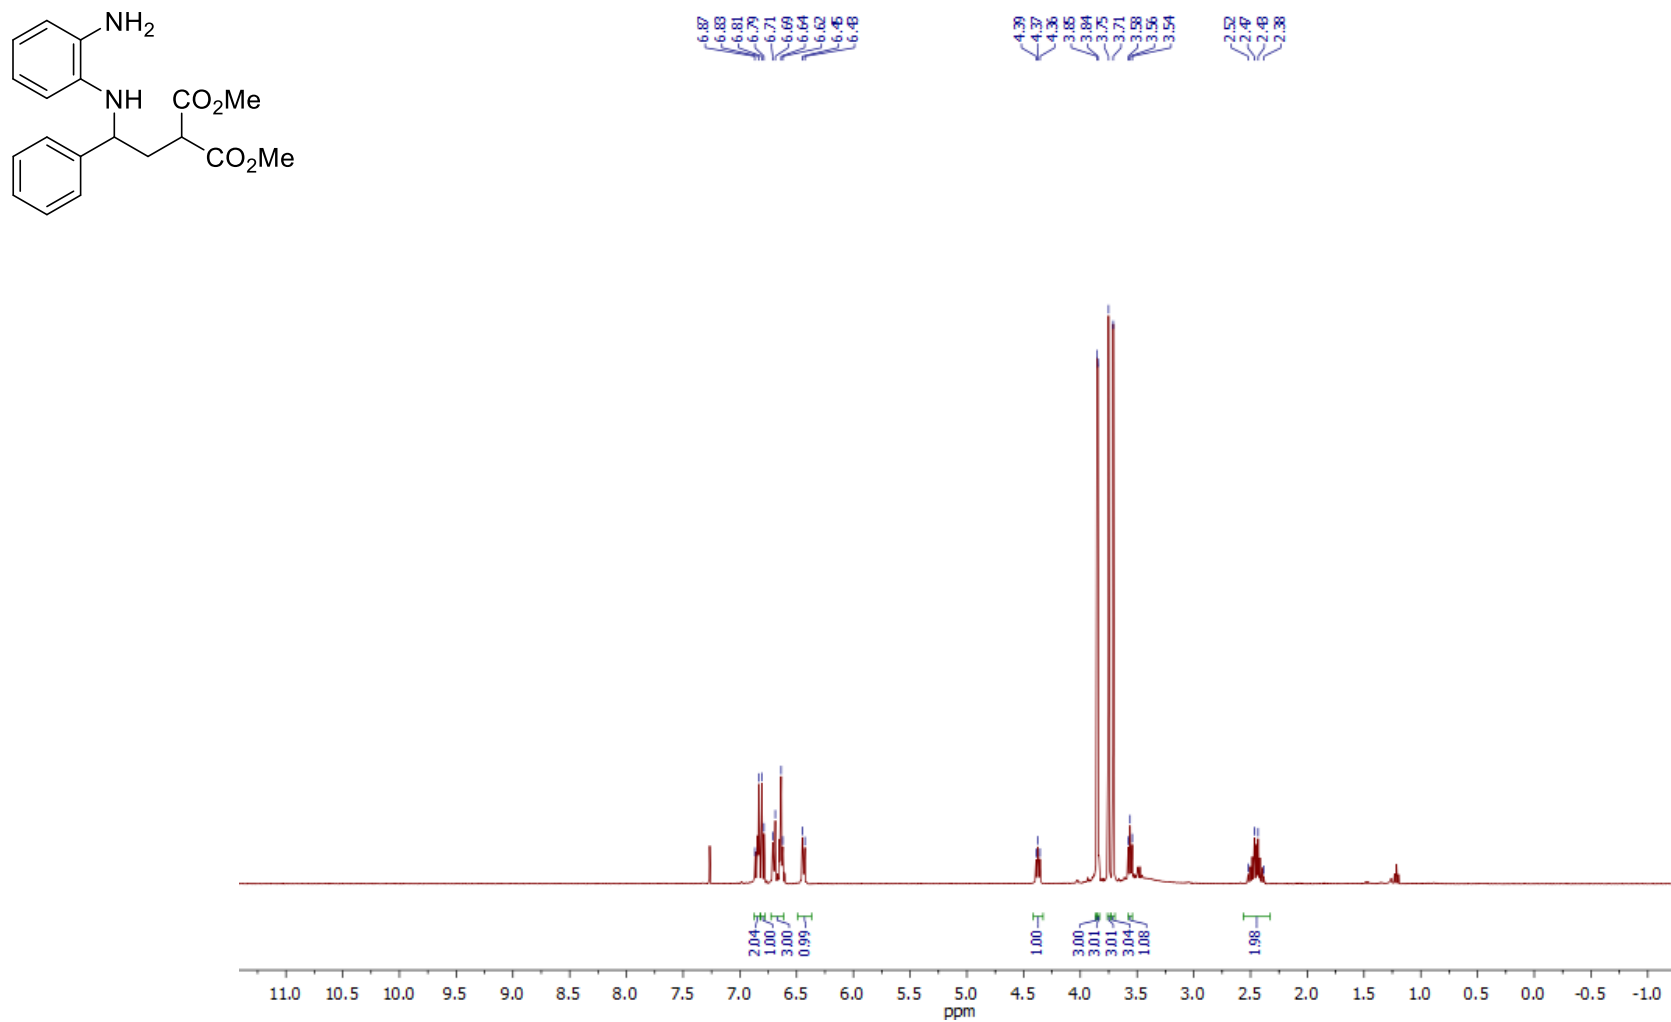

**Dimethyl 2-{2-[(2-aminophenyl)amino]-2-(3,4-dimethoxyphenyl)ethyl}malonate (4c)**

$^{13}\text{C}$  NMR ( $\text{CDCl}_3$ , 100 MHz)

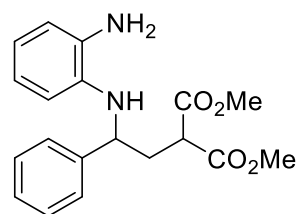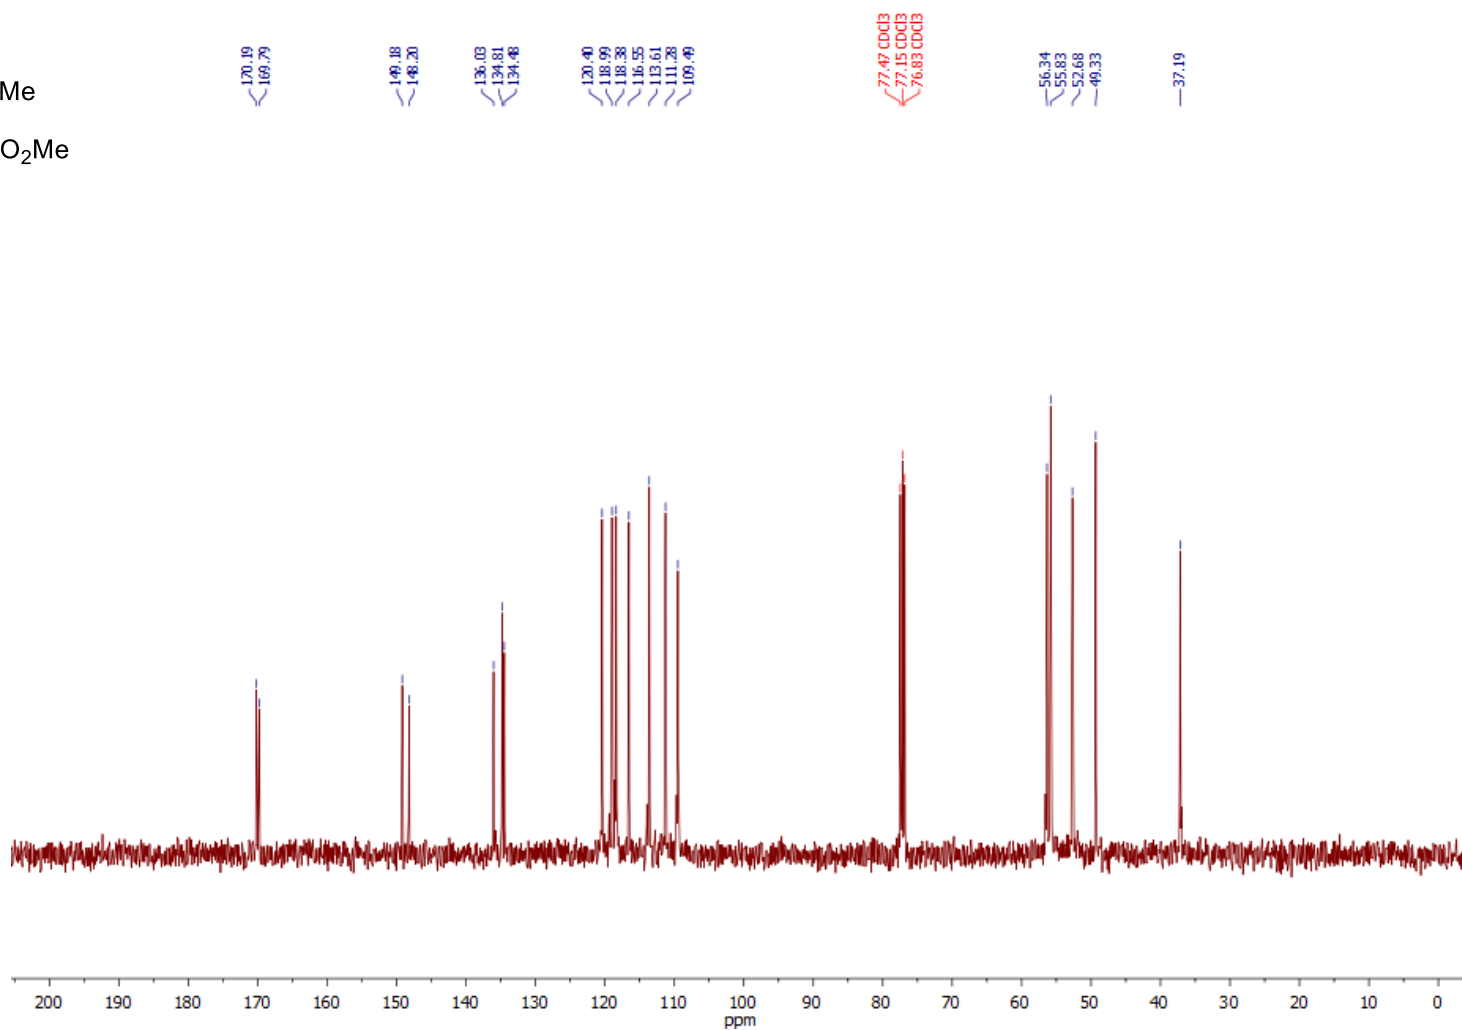

**2-[2-Phenyl-2-(phenylamino)ethyl]malononitrile (4d)**

<sup>1</sup>H NMR (CDCl<sub>3</sub>, 600 MHz)

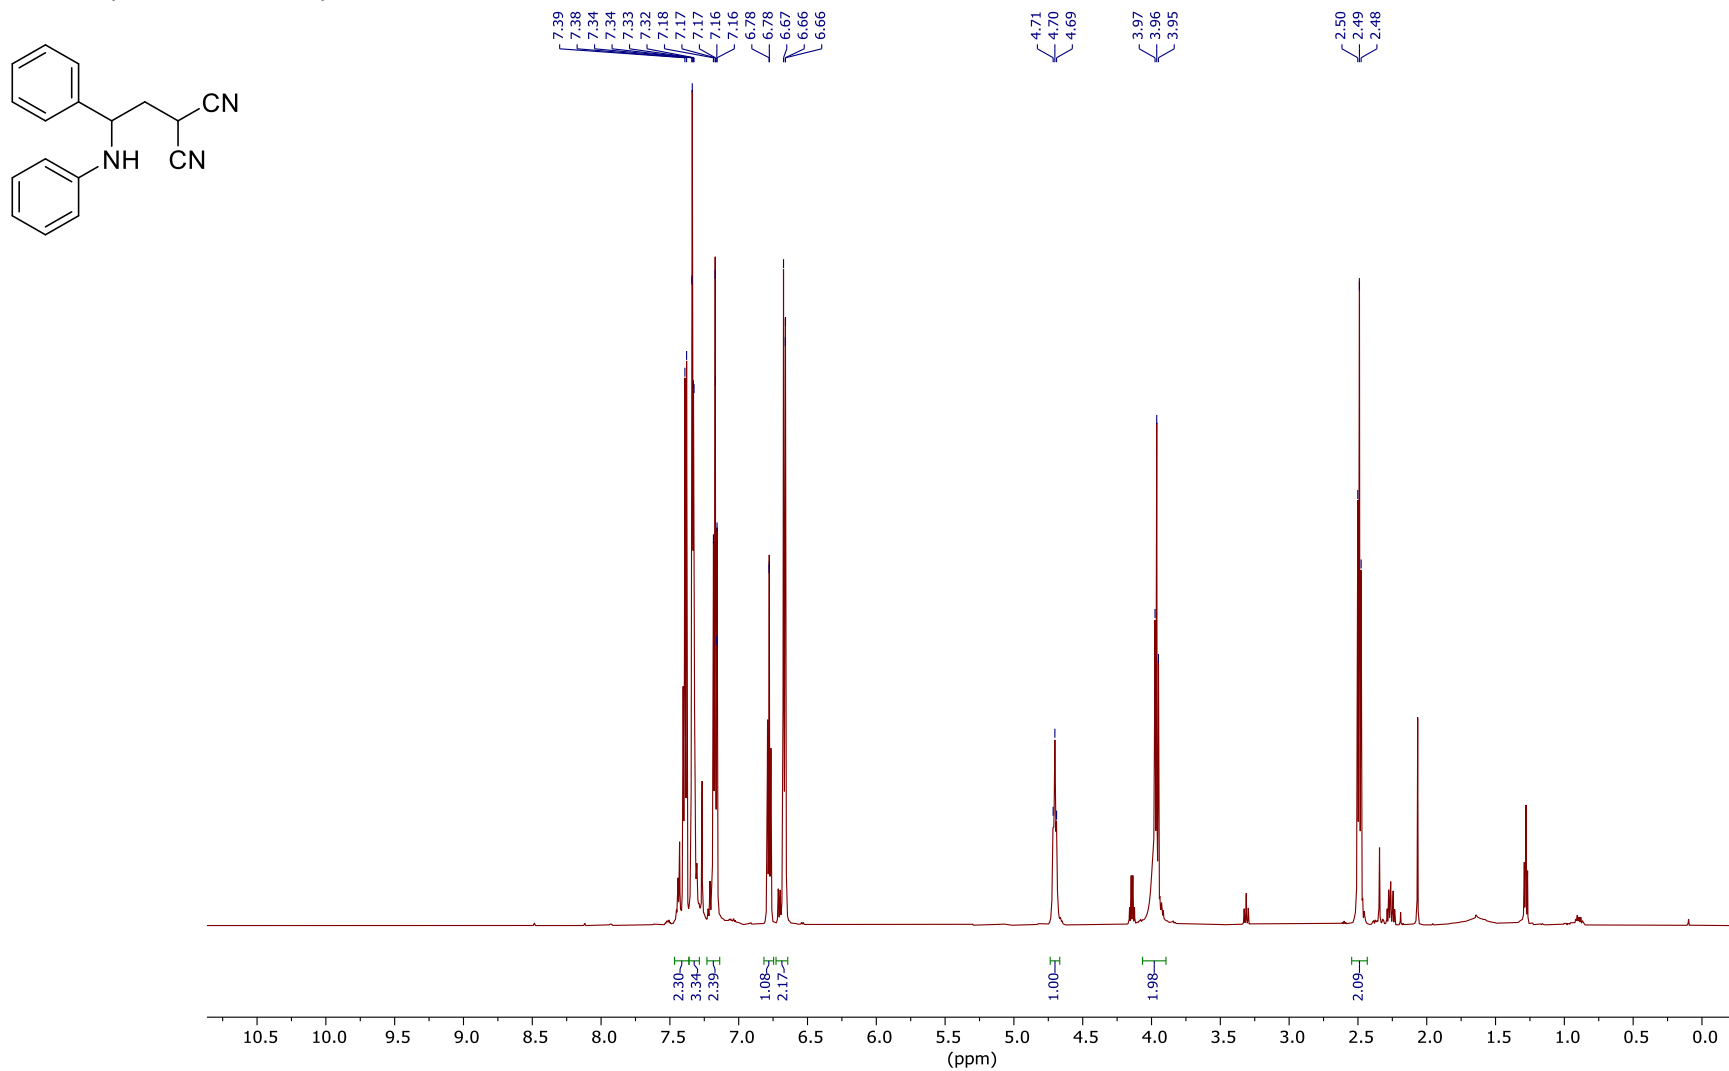

## 2-[2-Phenyl-2-(phenylamino)ethyl]malononitrile (4d)

$^{13}\text{C}$  NMR ( $\text{CDCl}_3$ , 150 MHz)

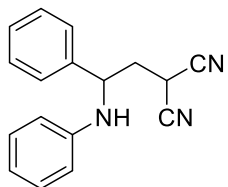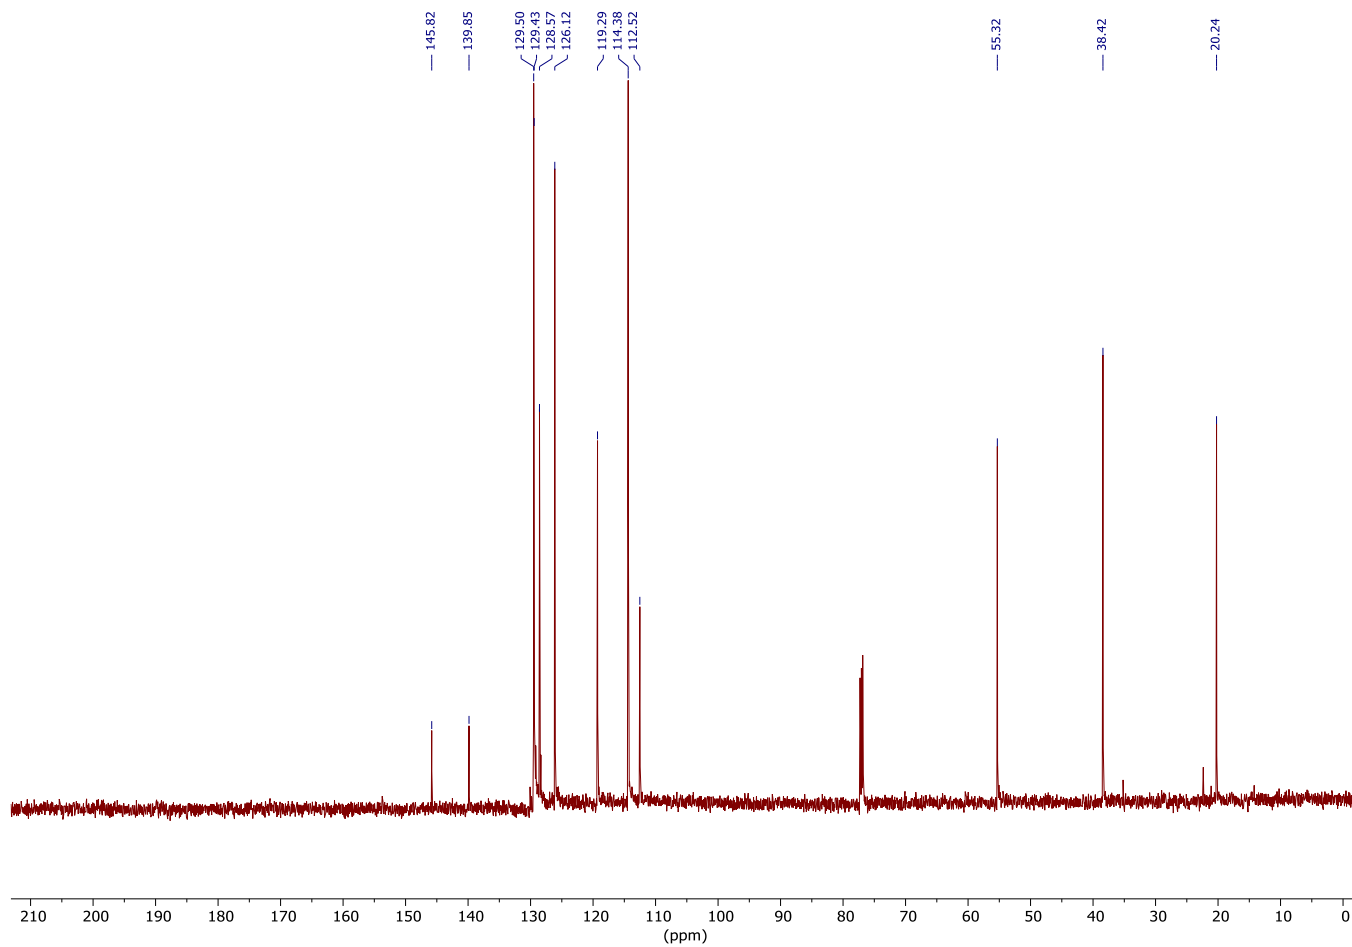

**2-[2-Phenyl-2-(phenylamino)ethyl]malononitrile (4d)**

HSQC  $^1\text{H}$ - $^{13}\text{C}$  ( $\text{CDCl}_3$ )

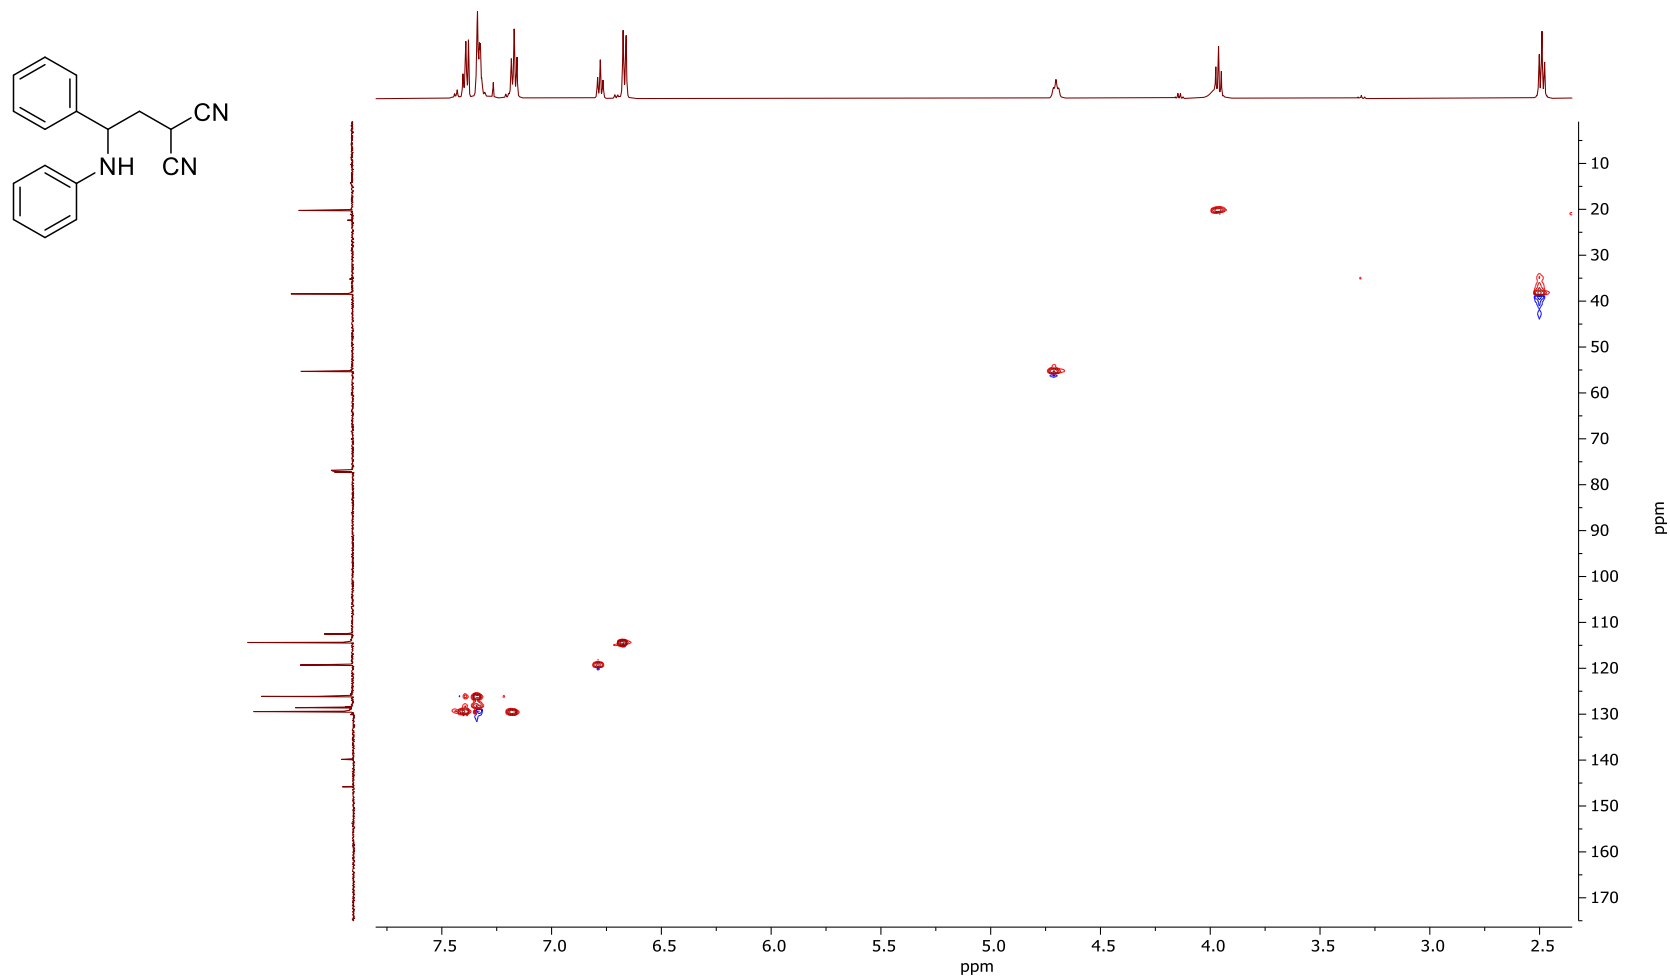

**2-[2-Phenyl-2-(phenylamino)ethyl]malononitrile (4d)**

HMBC  $^1\text{H}$ - $^{13}\text{C}$  ( $\text{CDCl}_3$ )

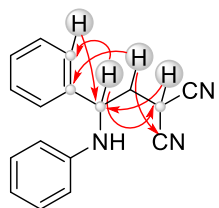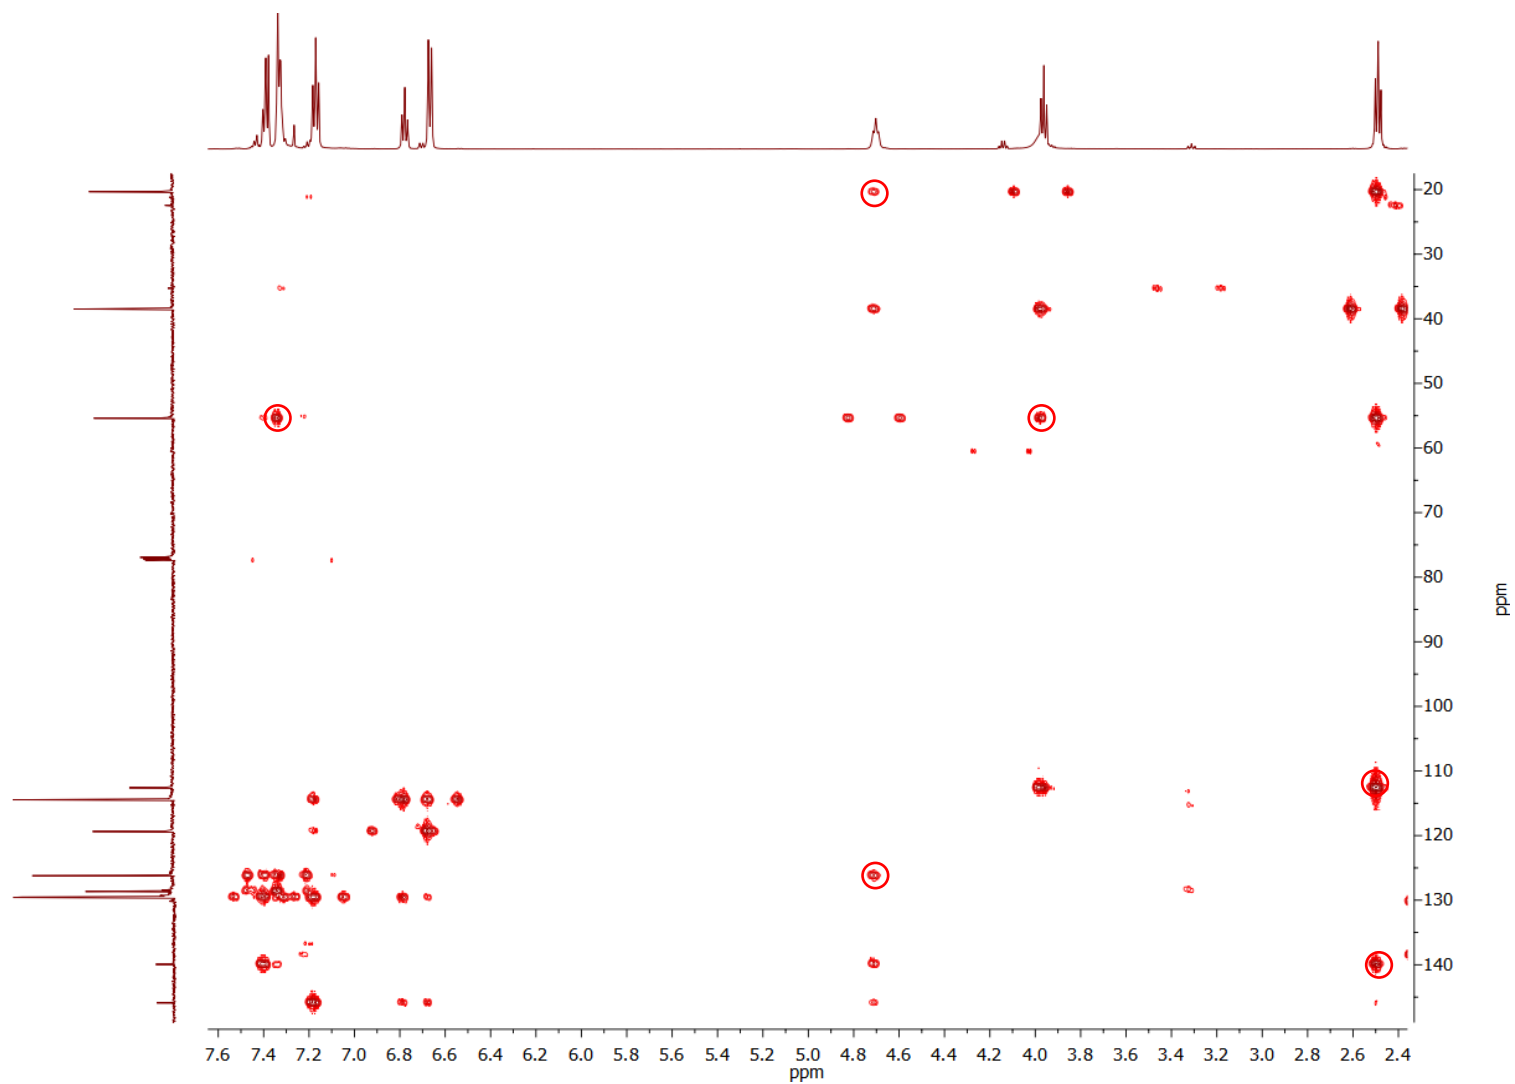

**2-{2-[(2-Bromo-4-methylphenyl)amino]-2-phenylethyl}malononitrile (4e)**

$^1\text{H}$  NMR ( $\text{CD}_3\text{OD}$ , 600 MHz)

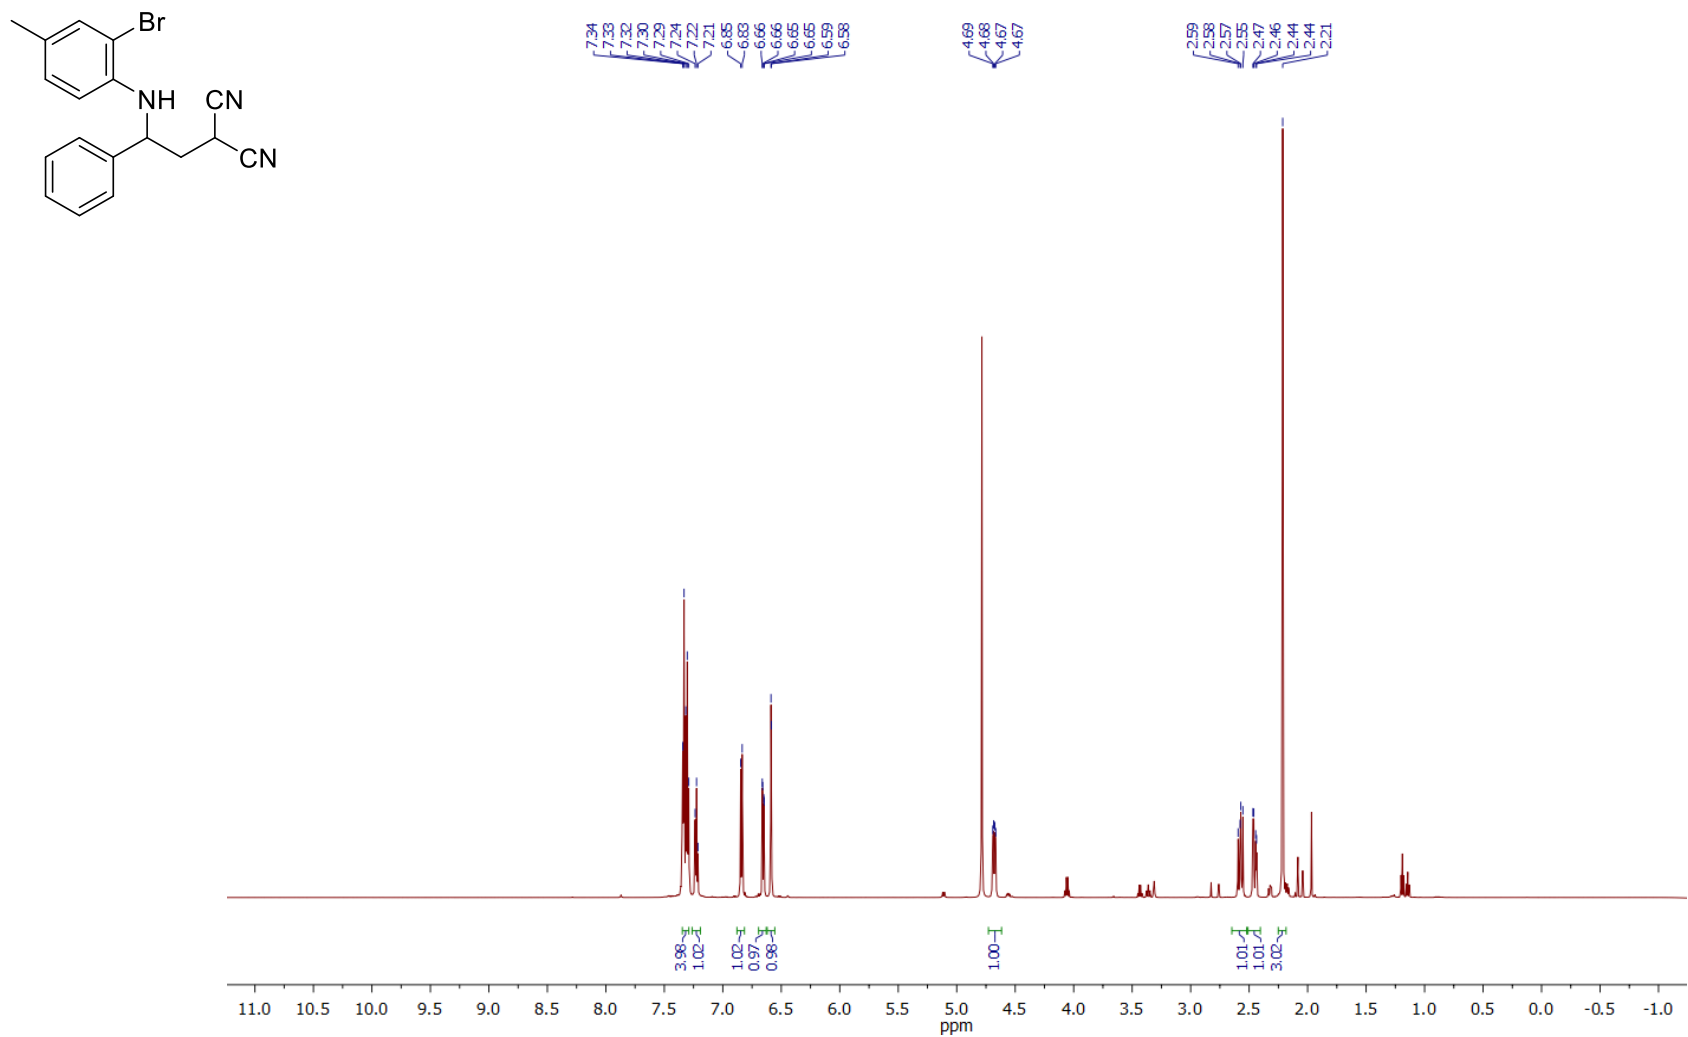

**2-{2-[(2-Bromo-4-methylphenyl)amino]-2-phenylethyl}malononitrile (4e)**

$^{13}\text{C}$  NMR ( $\text{CD}_3\text{OD}$ , 150 MHz)

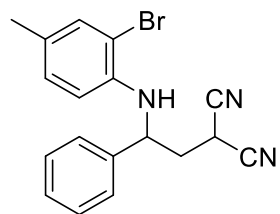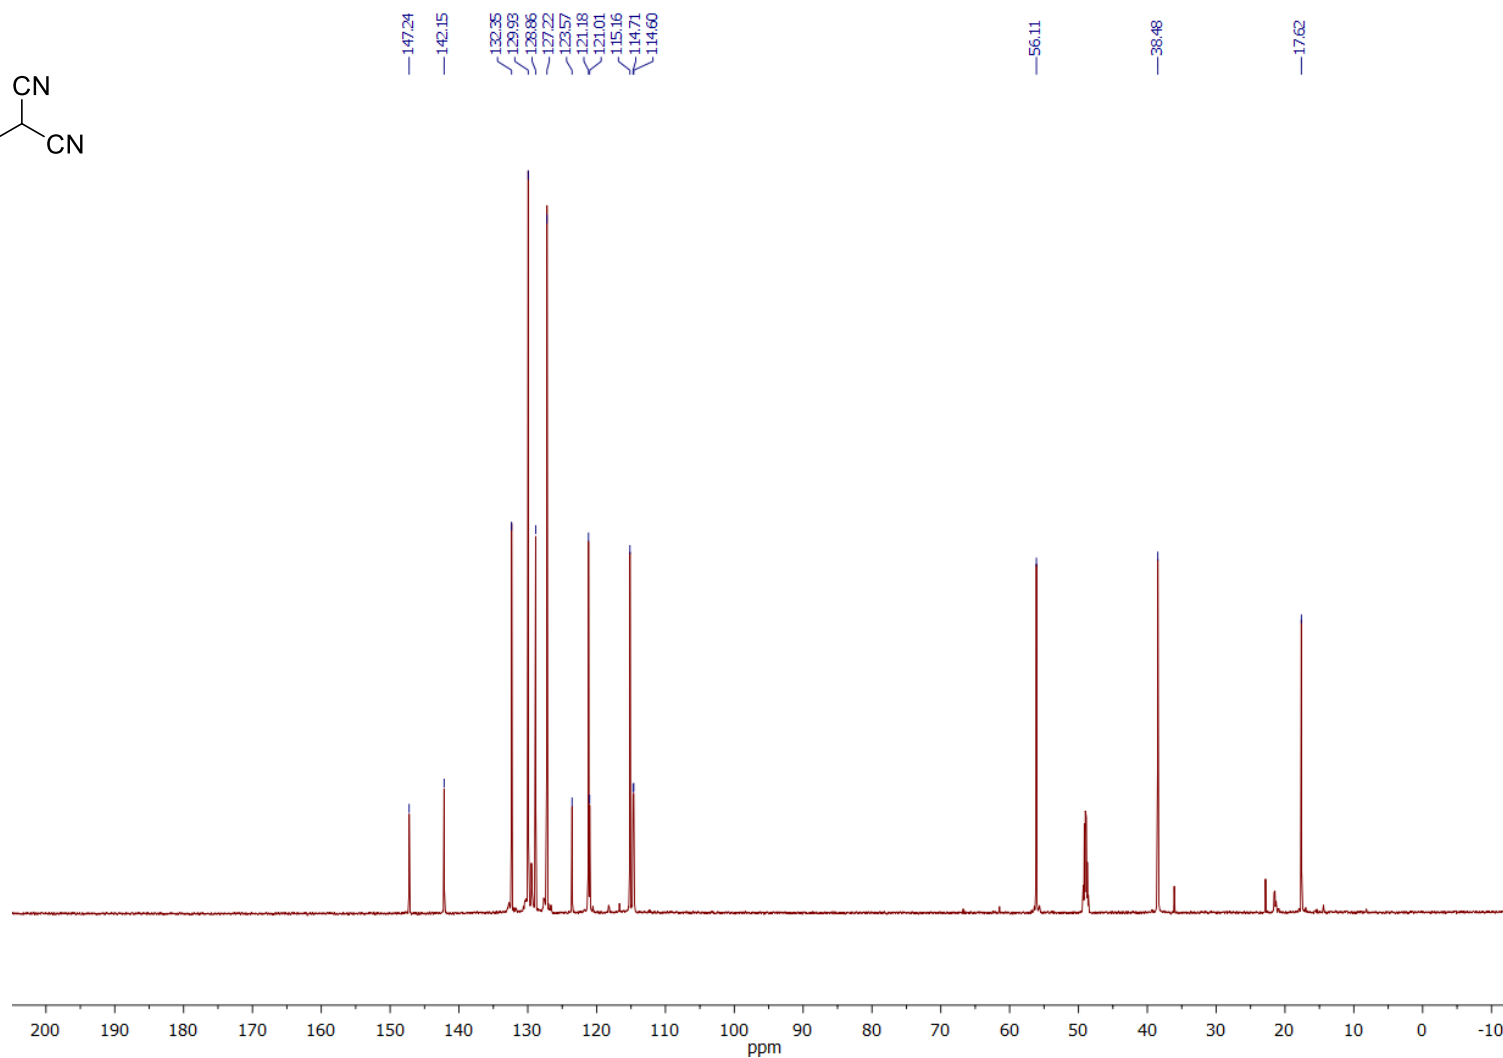



2-{2-[(2-Bromo-4-methylphenyl)amino]-2-phenylethyl}malononitrile (4e)

HSQC  $^1\text{H}$ - $^{13}\text{C}$  ( $\text{CD}_3\text{OD}$ )

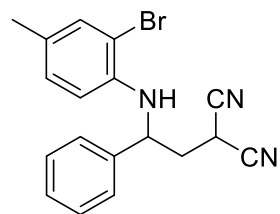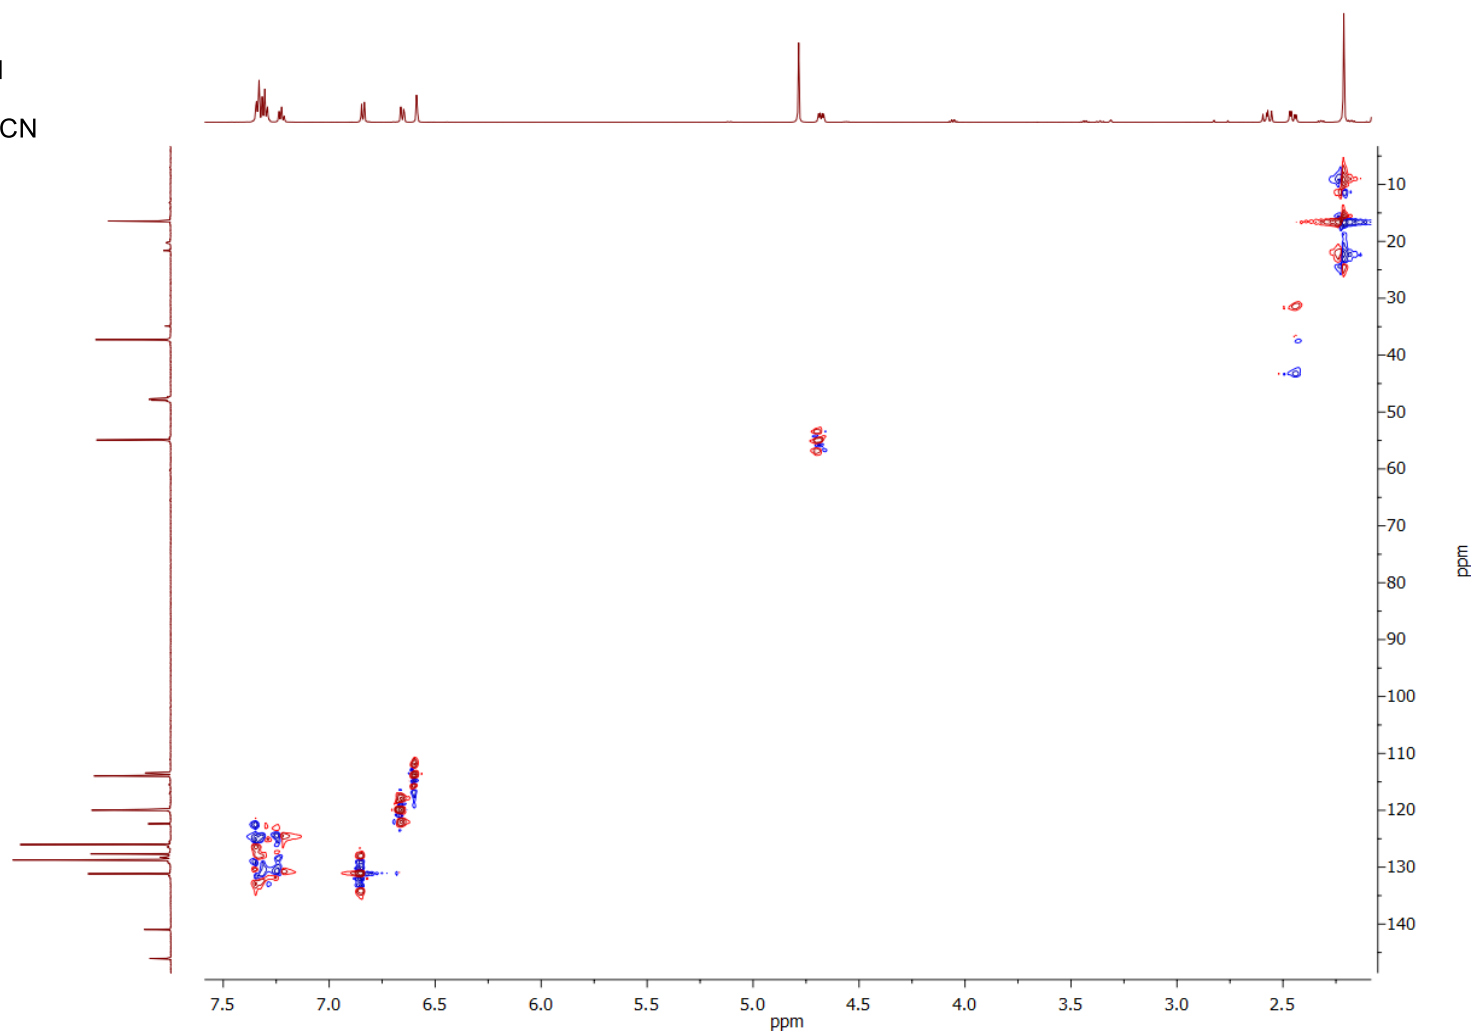

**2-{2-[(2-Bromo-4-methylphenyl)amino]-2-phenylethyl}malononitrile (4e)**

HMBC  $^1\text{H}$ - $^{13}\text{C}$  ( $\text{CD}_3\text{OD}$ )

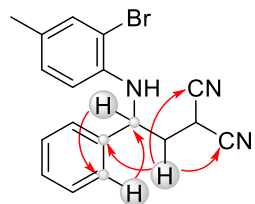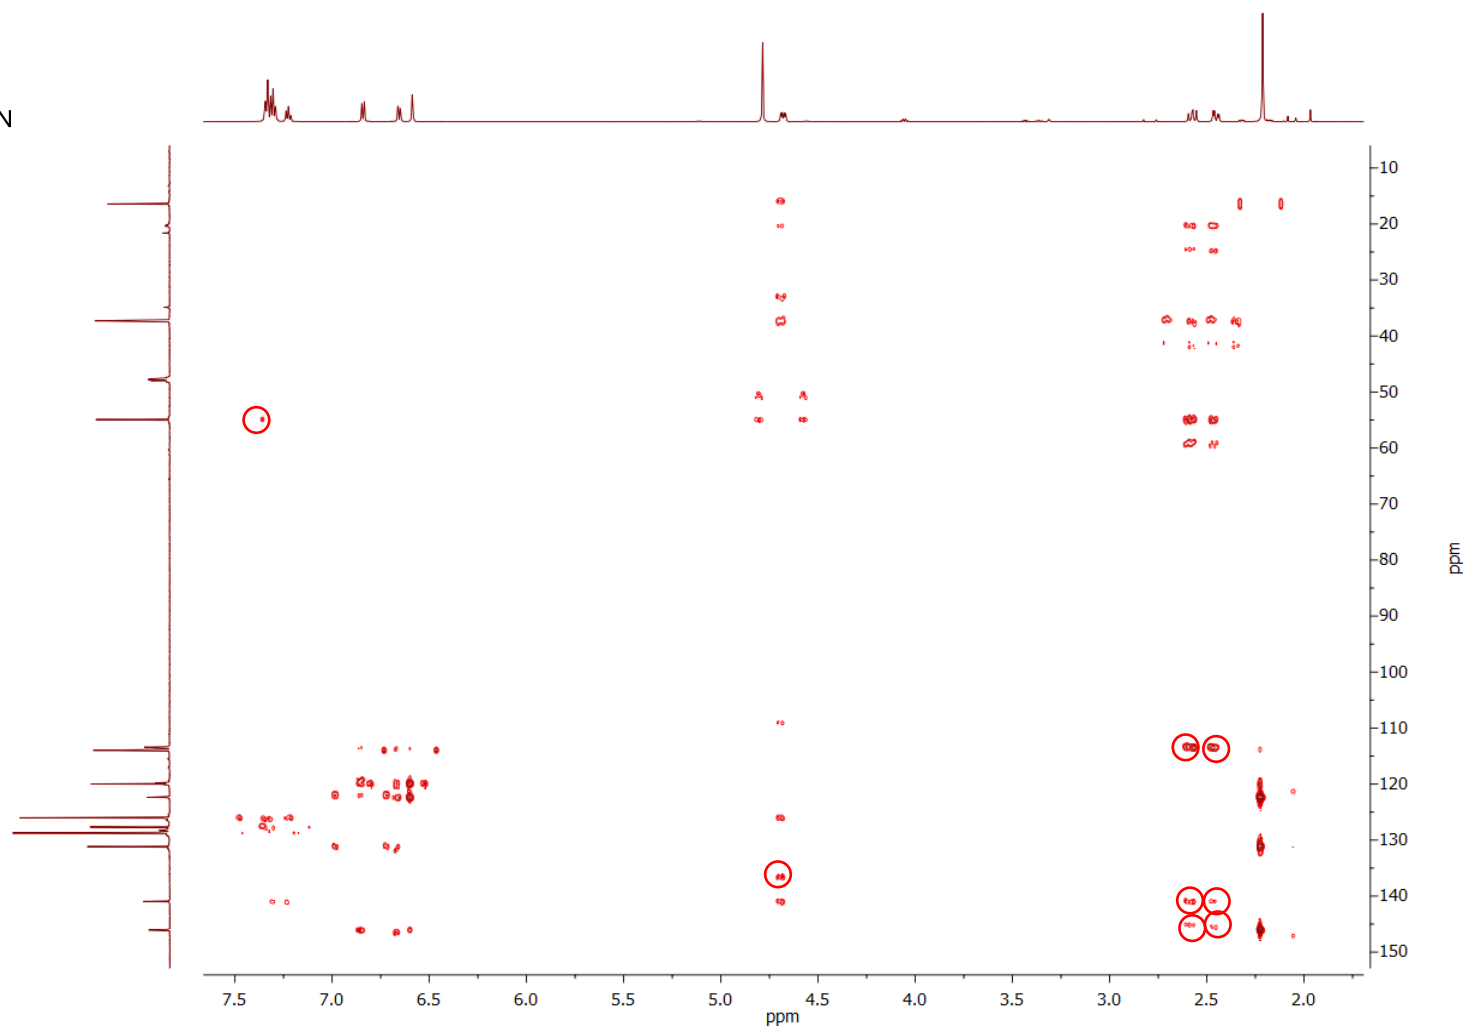

**(3*aRS*,5*RS*)-5-Phenyl-3,3*a*,4,5-tetrahydropyrrolo[1,2-*a*]quinoline-1(2*H*)-one (5)**

<sup>1</sup>H NMR (CDCl<sub>3</sub>, 600 MHz)

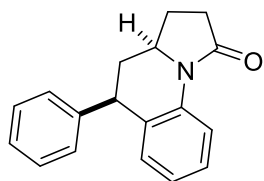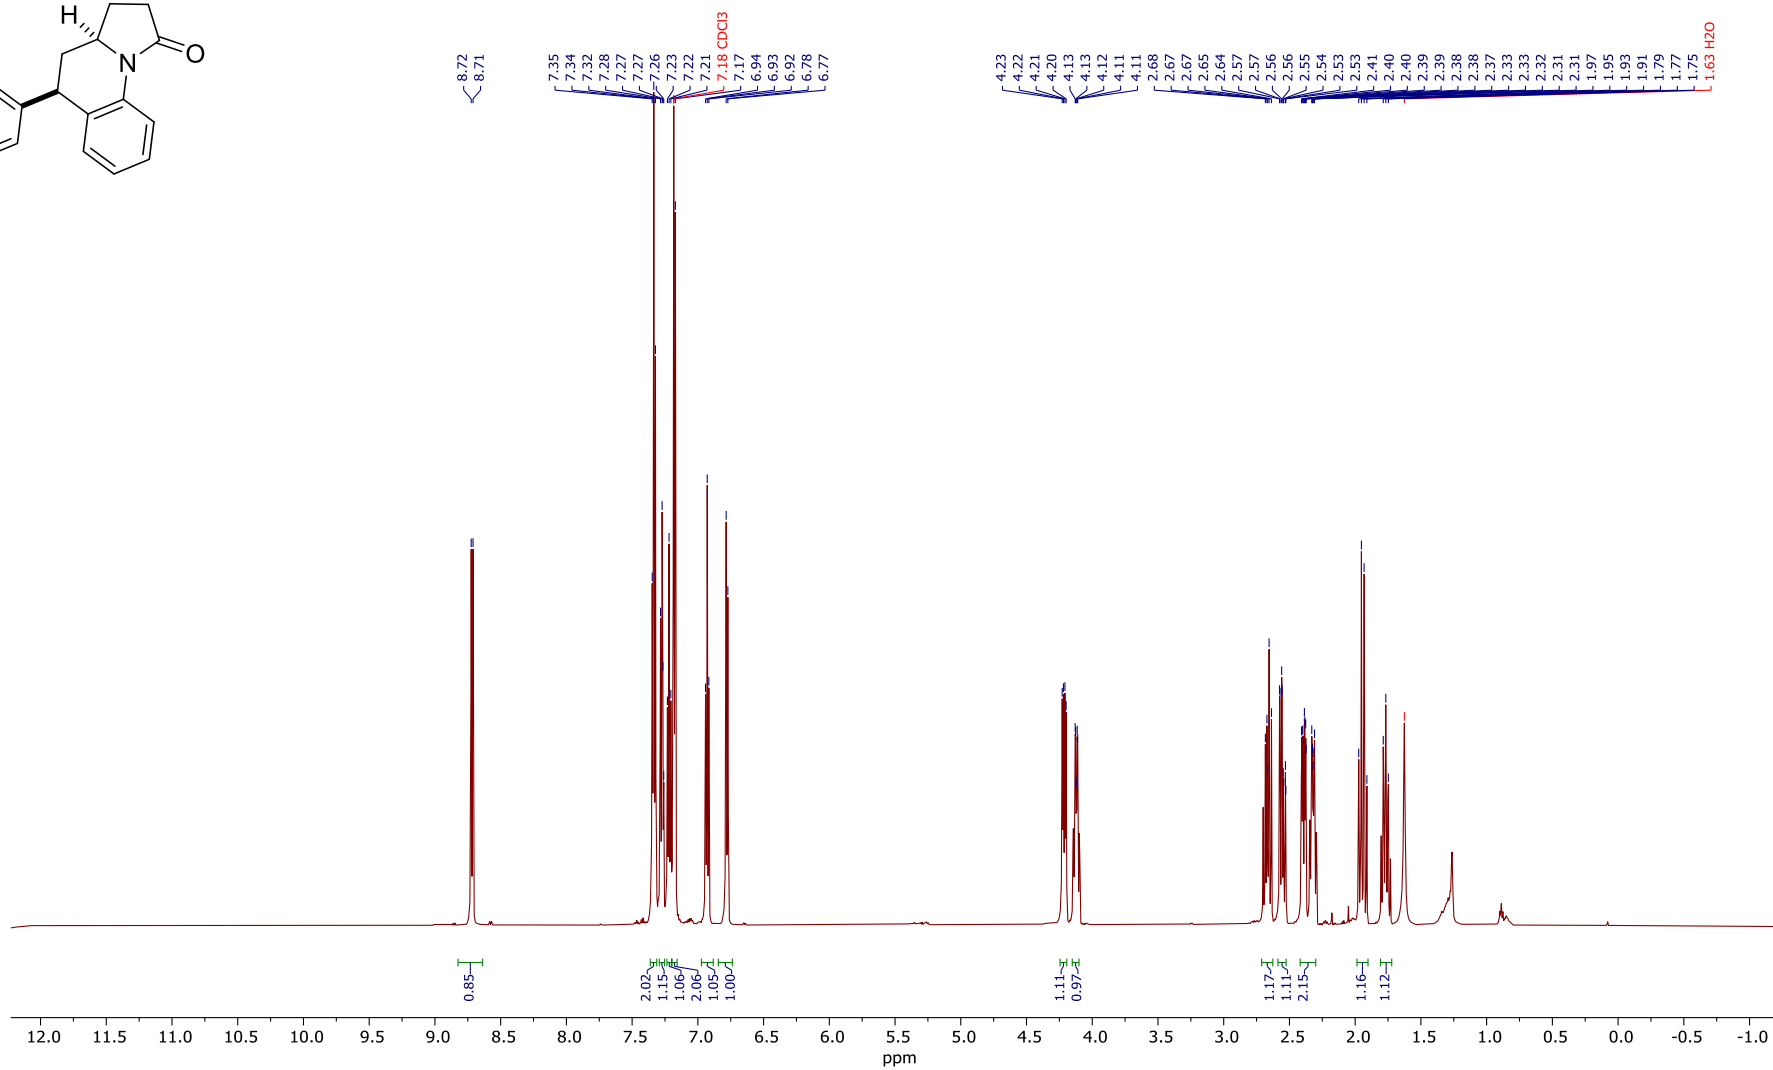

**(3*aRS*,5*RS*)-5-Phenyl-3,3*a*,4,5-tetrahydropyrrolo[1,2-*a*]quinoline-1(2*H*)-one (5)**

<sup>13</sup>C NMR (CDCl<sub>3</sub>, 150 MHz)

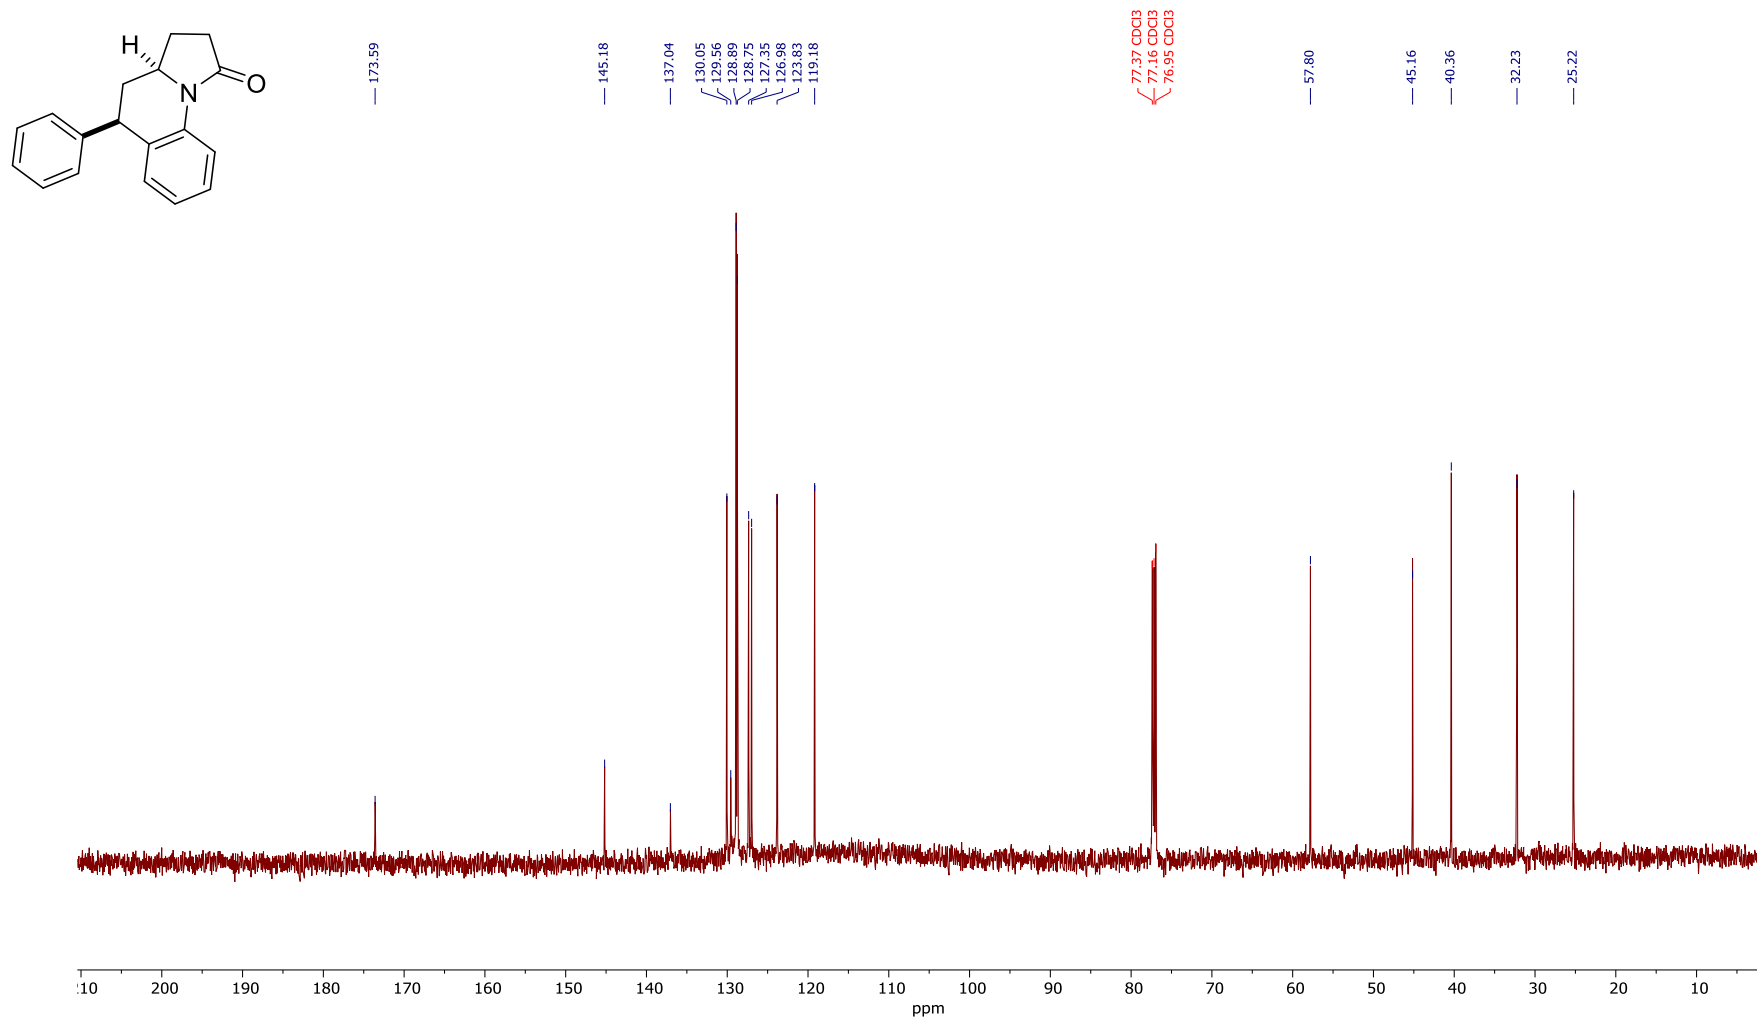

**(3*aRS*,5*RS*)-5-Phenyl-3,3*a*,4,5-tetrahydropyrrolo[1,2-*a*]quinoline-1(2*H*)-one (5)**

HSQC  $^1\text{H}$ - $^{13}\text{C}$  ( $\text{CDCl}_3$ )

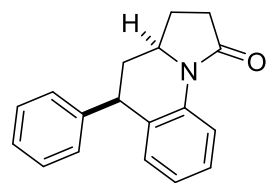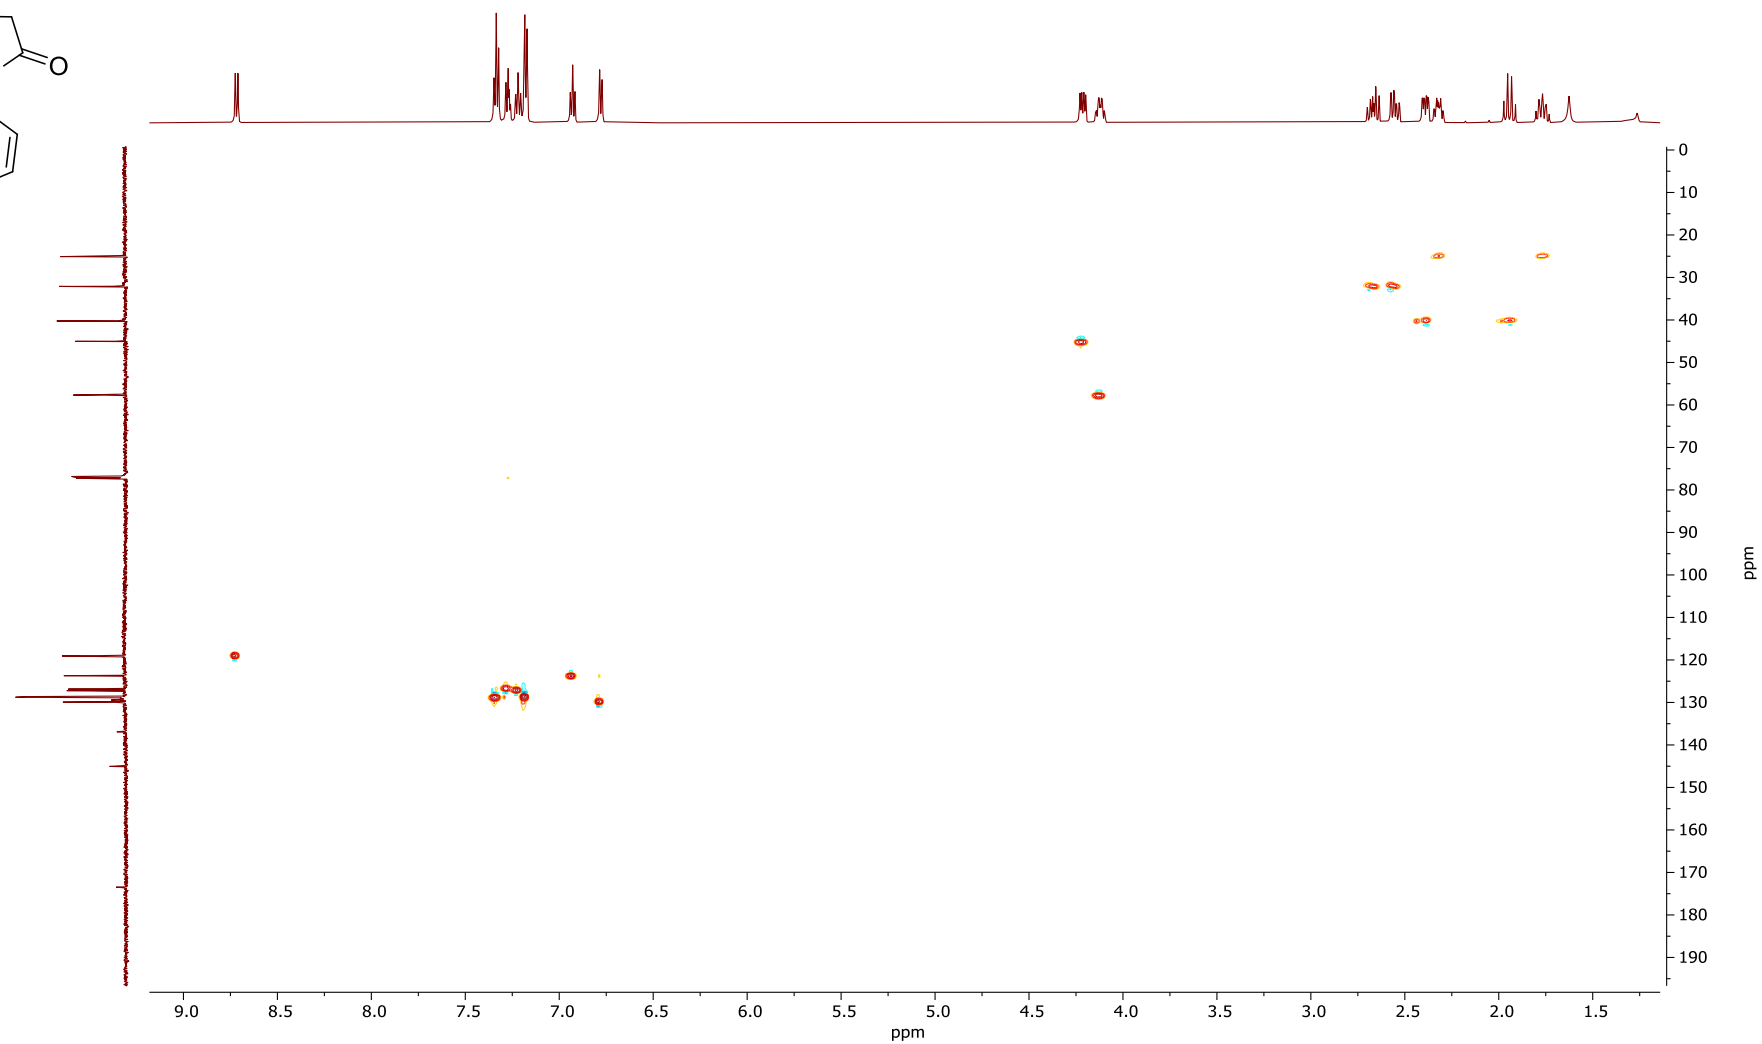

**(3*aRS*,5*RS*)-5-Phenyl-3,3*a*,4,5-tetrahydropyrrolo[1,2-*a*]quinoline-1(2*H*)-one (5)**

HMBC  $^1\text{H}$ - $^{13}\text{C}$  ( $\text{CDCl}_3$ )

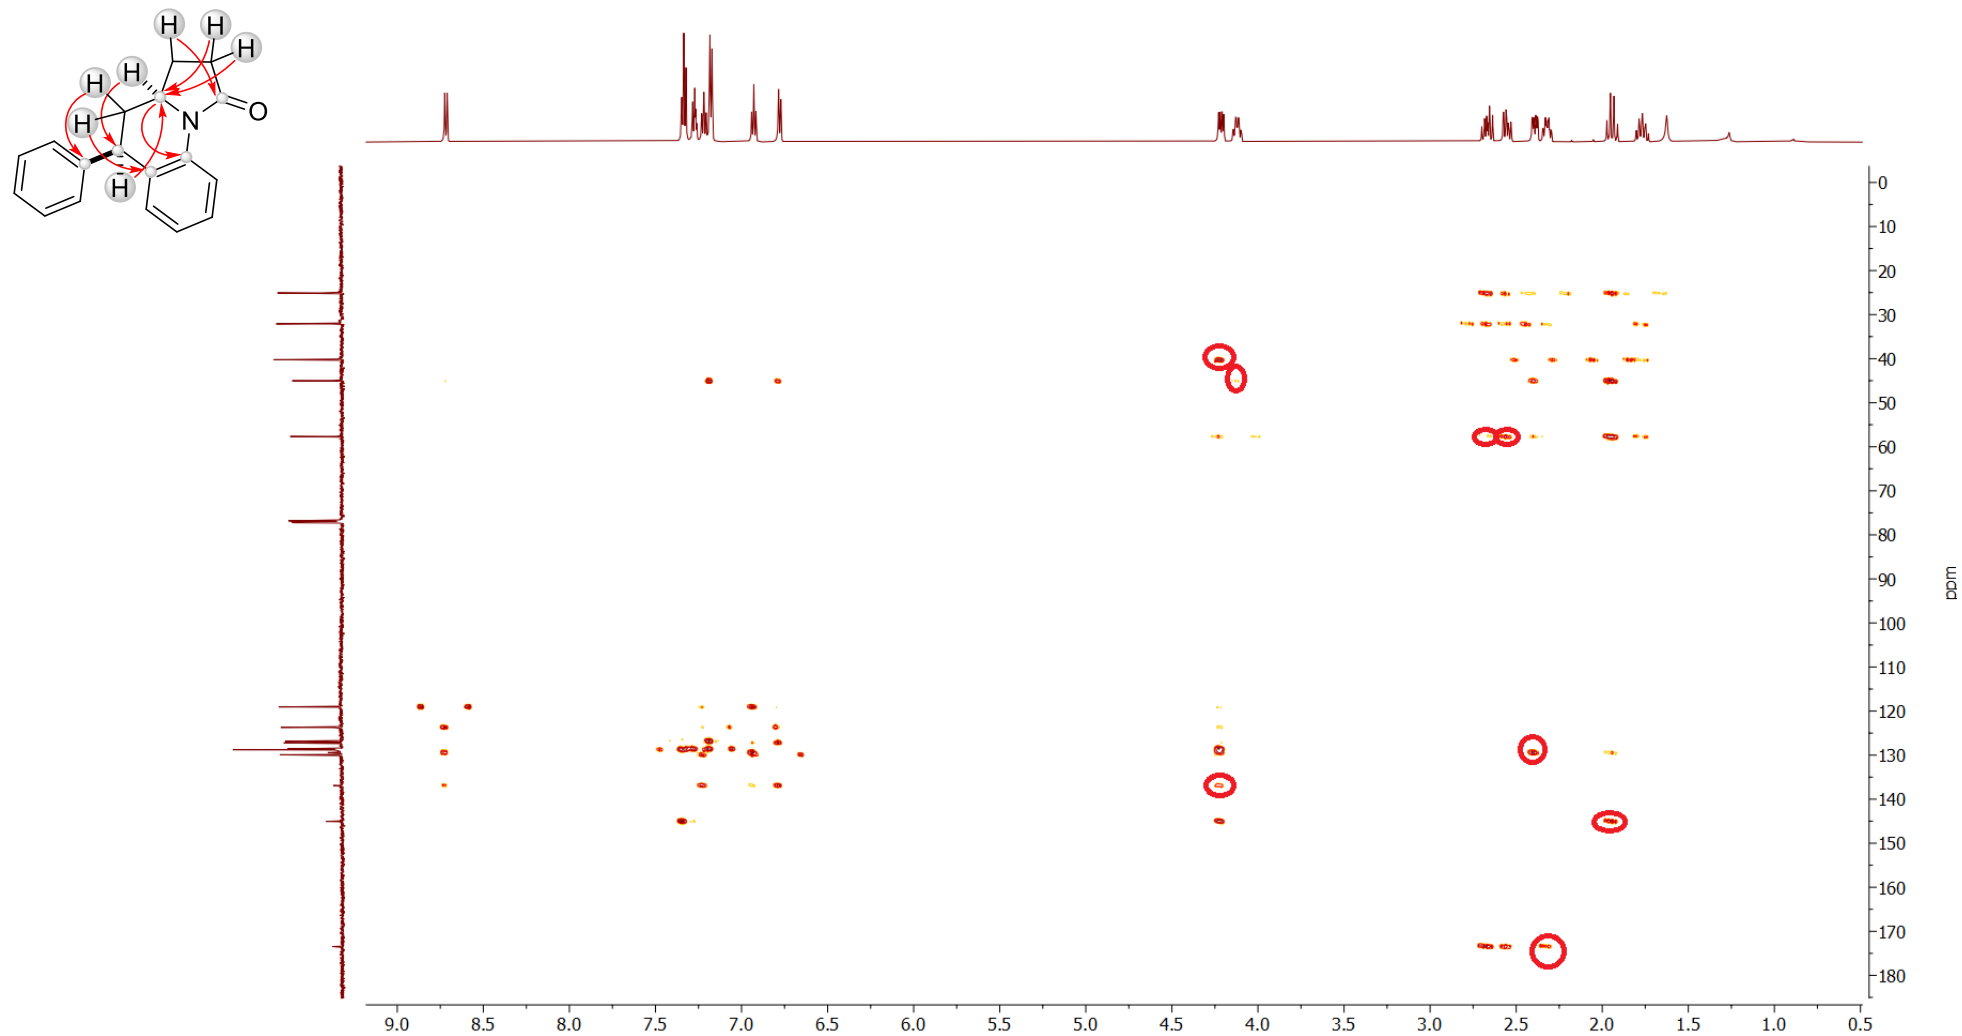

**(3*aRS*,5*RS*)-5-Phenyl-3,3*a*,4,5-tetrahydropyrrolo[1,2-*a*]quinoline-1(2*H*)-one (5)**

NOESY (CDCl<sub>3</sub>) (CDCl<sub>3</sub>)

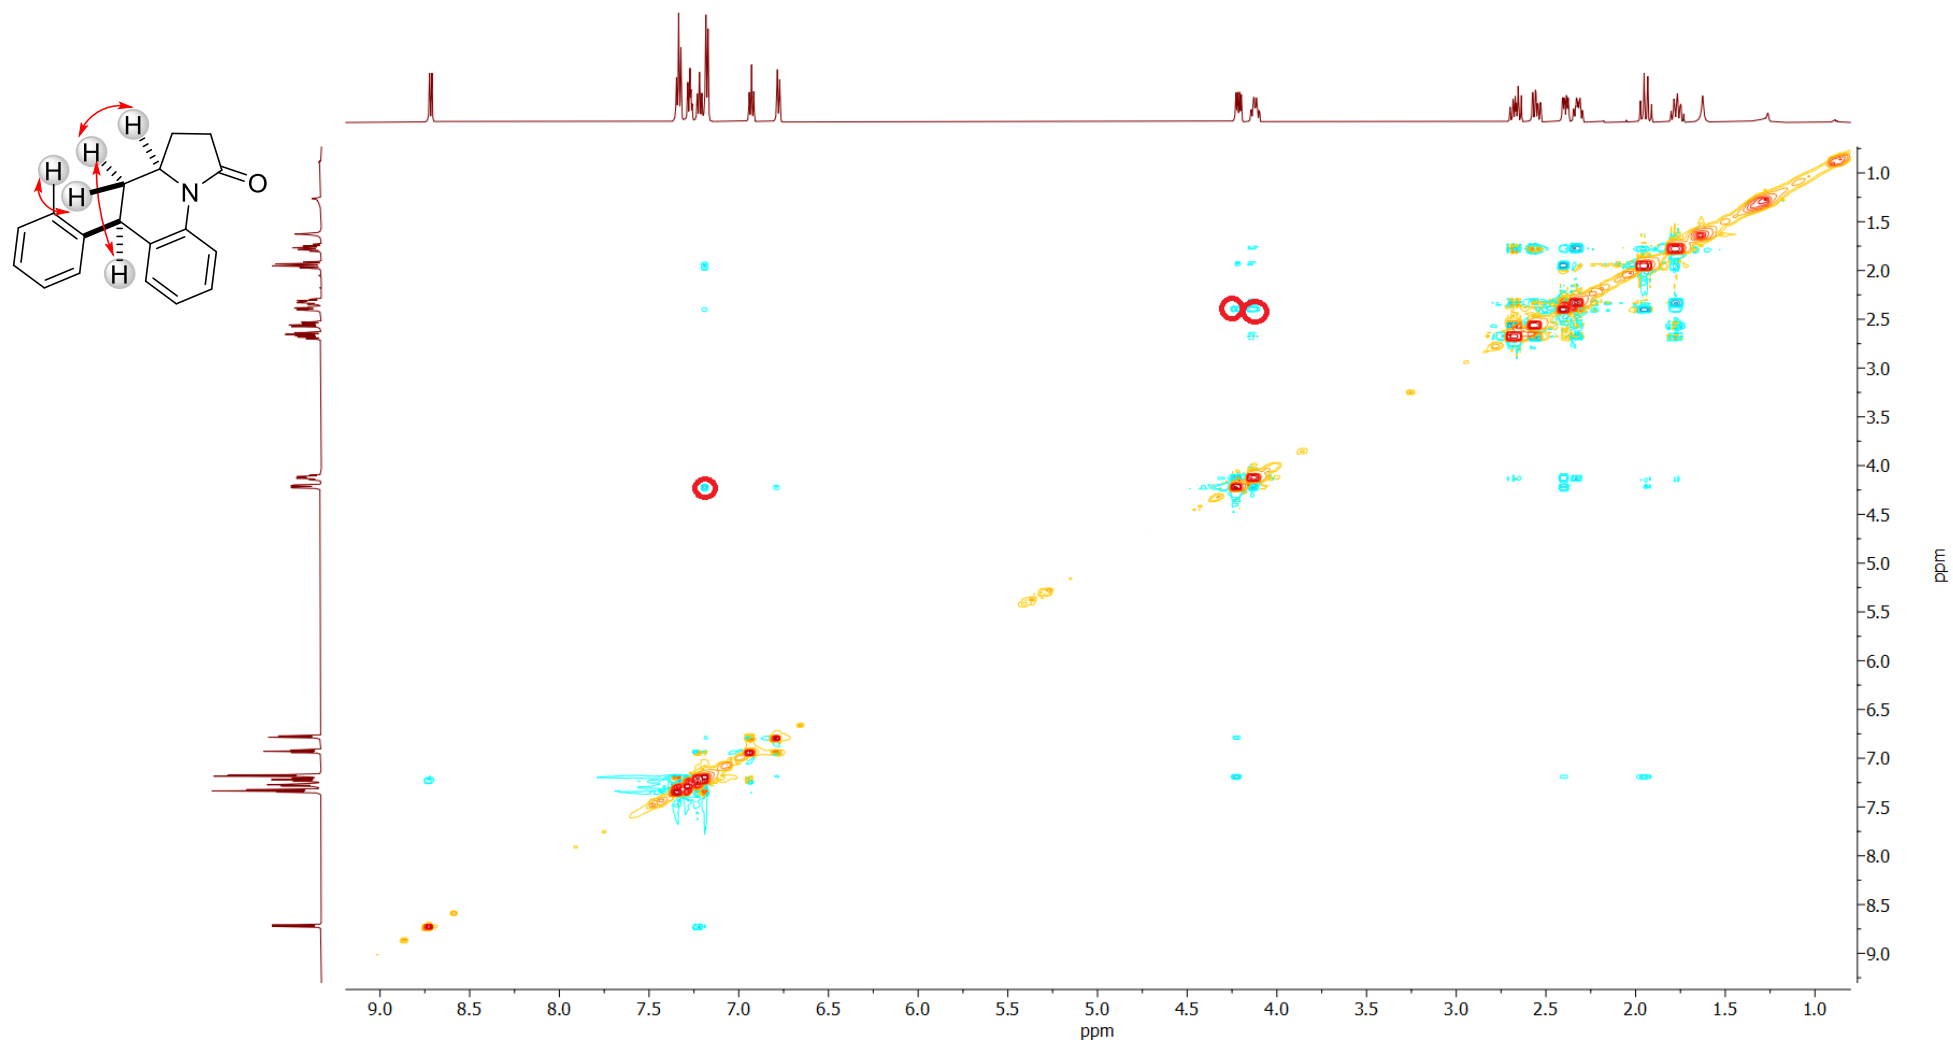

# HPLC report for racemic 1-(4-methoxyphenyl)-5-(*p*-tolyl)pyrrolidin-2-one (2d)

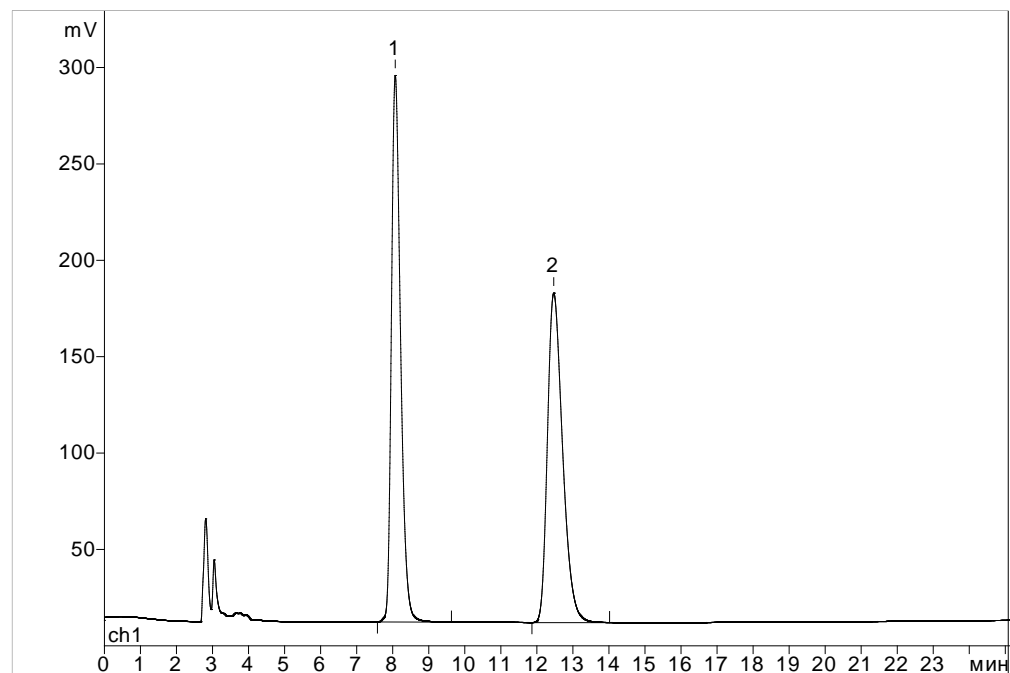

| No    | Retention<br>мин | Area<br>mV*сек | Area<br>% | Name |
|-------|------------------|----------------|-----------|------|
| 1     | 8.07             | 4999.208       | 50.04     |      |
| 2     | 12.47            | 4990.657       | 49.96     |      |
| <hr/> |                  |                |           |      |
| 2     | 25.15            | 9989.865       | 100.00    |      |



# HPLC report for enantioenriched 1-(4-methoxyphenyl)-5-(*p*-tolyl)pyrrolidin-2-one (*R*)-2d

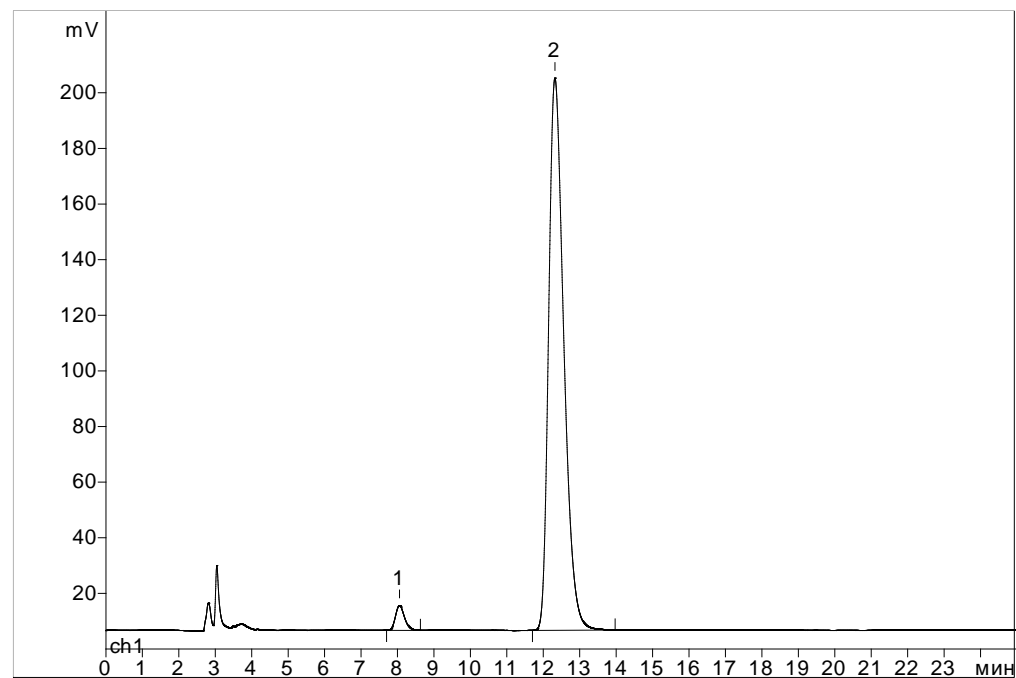

| No    | Retention<br>мин | Area<br>mV*сек | Area<br>% | Name |
|-------|------------------|----------------|-----------|------|
| 1     | 8.05             | 154.491        | 2.63      |      |
| 2     | 12.32            | 5720.528       | 97.37     |      |
| <hr/> |                  |                |           |      |
| 2     | 25.00            | 5875.020       | 100.00    |      |
